# Supplementary material for: A one-pot dilithiation–lithium–zinc exchange–Negishi coupling approach to 2,6-di(hetero)aryl substituted dithienothiazines – a novel class of electronically fine-tunable redox systems
Source: Royal Society of Chemistry journal article supplement (doi:10.1039/c5qo00046g), 2015-01-01
Supplement: c5qo00046g1.pdf [file c5qo00046g1.pdf]

## Supporting Information

# **One-pot Dilithiation-Lithium-Zinc Exchange- Negishi Coupling Approach to 2,6-Di(hetero)aryl Substituted Dithienothiazines – A Novel Class of Electronically Fine-tunable Redox Systems**

Catherine Dostert and Thomas J. J. Müller\*

Institut für Organische und Makromolekulare Chemie

Heinrich-Heine-Universität Düsseldorf

Universitätsstr. 1, D-40225 Düsseldorf, Germany

E-Mail: [ThomasJJ.Mueller@uni-duesseldorf.de](mailto:ThomasJJ.Mueller@uni-duesseldorf.de)

Fax: (+)49 (0)211-8114324

## Table of contents

|                                                                                                              |    |
|--------------------------------------------------------------------------------------------------------------|----|
| 1 $^1\text{H}$ - and $^{13}\text{C}$ -NMR spectra of 2,6-di(hetero)aryl dithienothiazines <b>3a-3l</b> ..... | 3  |
| 2 $^1\text{H}$ - and $^{13}\text{C}$ -NMR spectra of 2-(hetero)aryl dithienothiazines <b>6a-6c</b> .....     | 27 |
| 3 UV and fluorescence spectra of 2,6-di(hetero)aryl dithienothiazines <b>3a-3l</b> .....                     | 33 |
| 4 UV and fluorescence spectra of 2-(hetero)aryl dithienothiazines <b>6a-6c</b> .....                         | 39 |
| 5 Cyclic voltammograms of 2,6-di(hetero)aryl dithienothiazines <b>3a-3l</b> .....                            | 41 |
| 6 Cyclic voltammograms of 2-(hetero)aryl dithienothiazines <b>6a-6c</b> .....                                | 47 |
| 7 Molecular modeling coordinates and FMO energies of compounds <b>3a</b> , <b>3c</b> and <b>3g-3j</b> .....  | 49 |

## 1 $^1\text{H}$ - and $^{13}\text{C}$ -NMR spectra of 2,6-di(hetero)aryl dithienothiazines 3a-3l

### 1.1 4-(4-Hexylphenyl)-2,6-bis(4-methoxyphenyl)-4H-dithieno[2,3-b:3',2'-e][1,4]thiazine (3a)

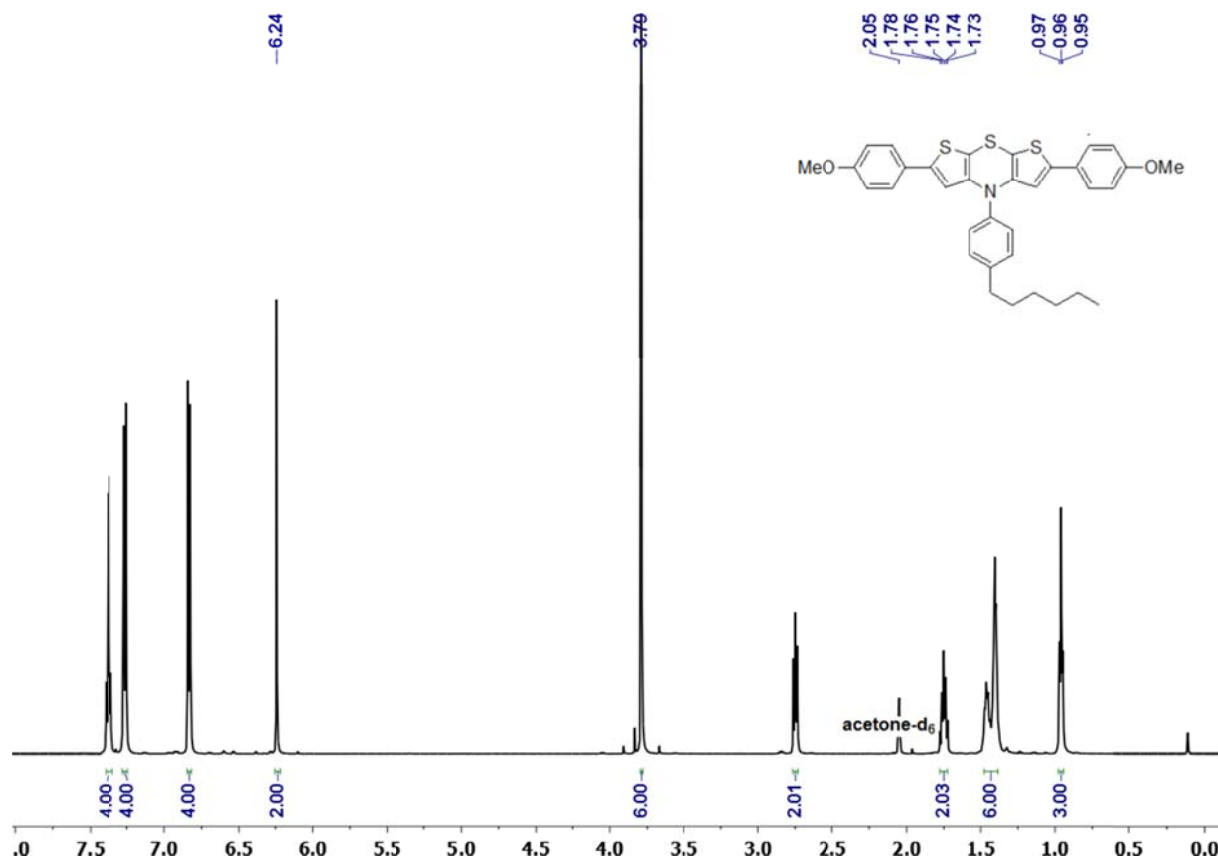

$^1\text{H}$ -NMR (600 MHz) of **3a** (20 mg) in acetone- $d_6$ /CS $_2$  1:1 at 313 K ( $\delta$  in ppm).

$^1\text{H}$ - and  $^{13}\text{C}$ -NMR spectra of 2,6-di(hetero)aryl dithienothiazines

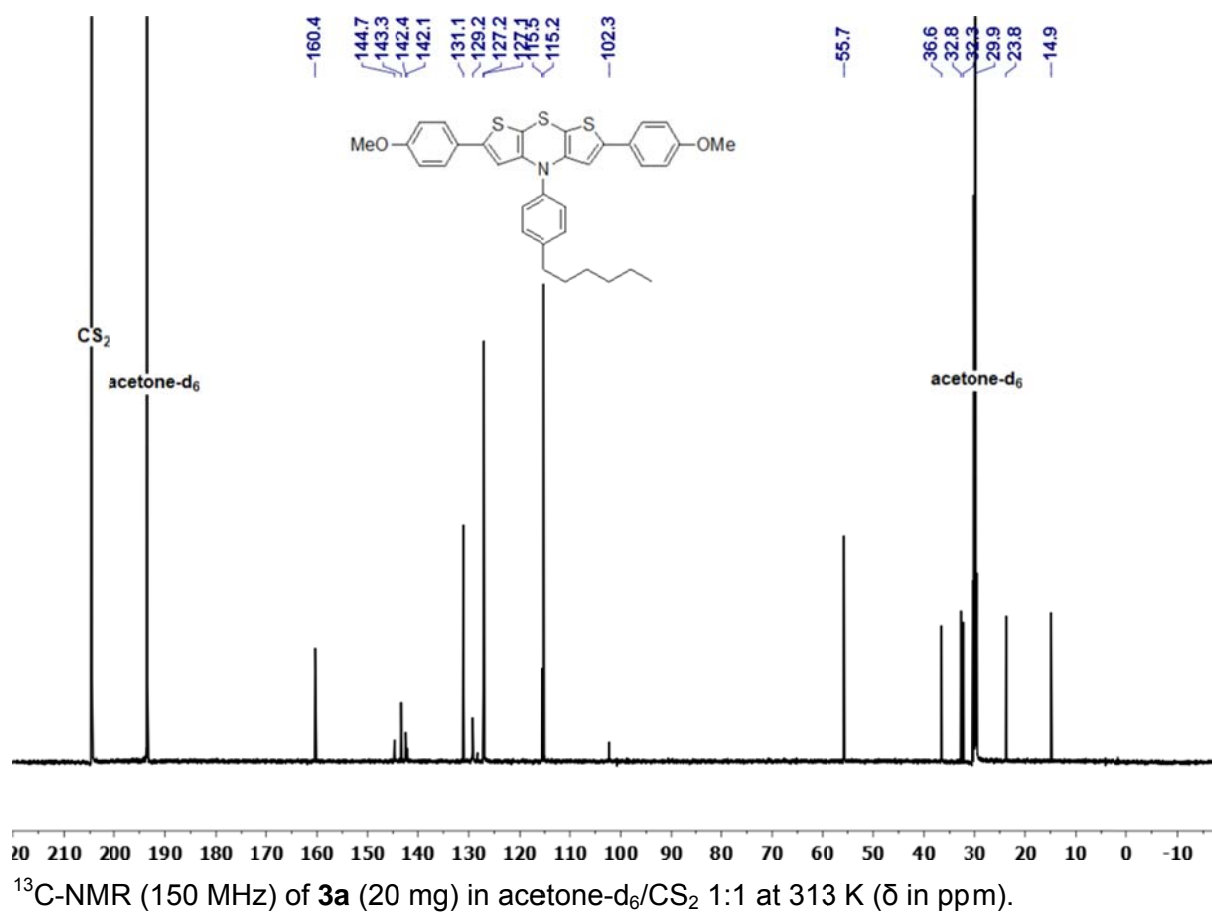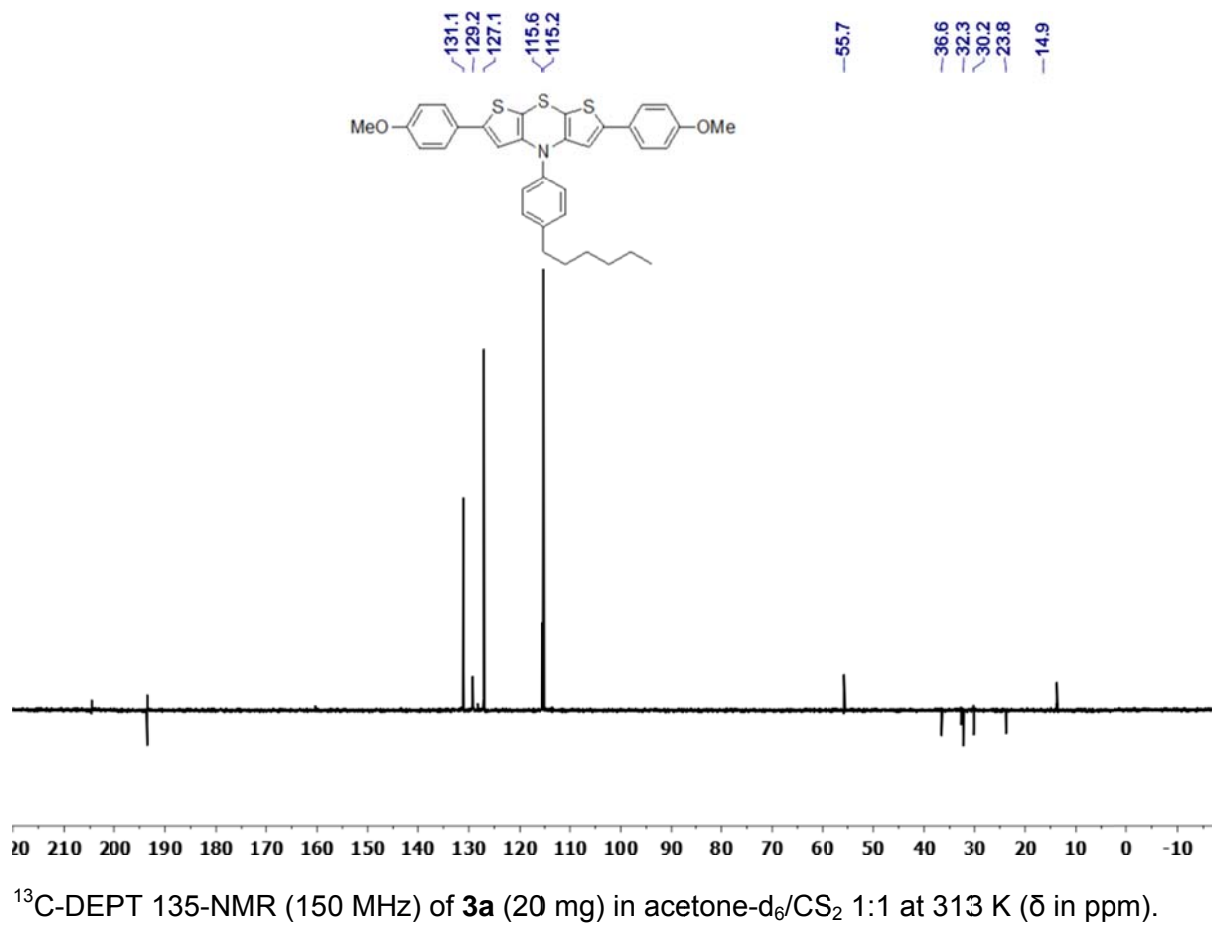

### 1.2 4-(4-Hexylphenyl)-2,6-di-p-tolyl-4H-dithieno[2,3-b:3',2'-e][1,4]thiazine (3b)

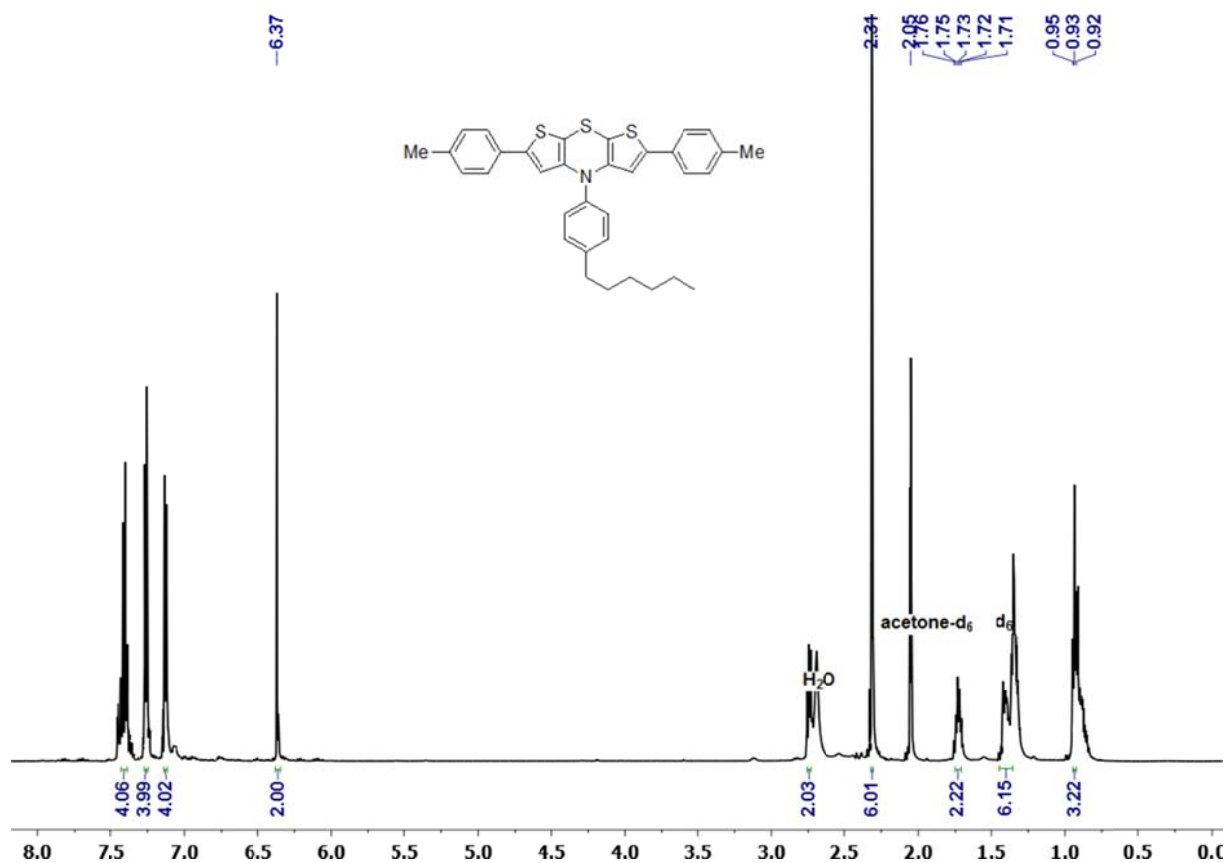

$^1\text{H}$ -NMR (600 MHz) of **3b** (20 mg) in acetone- $\text{d}_6/\text{CS}_2$  1:1 at 298 K ( $\delta$  in ppm).

$^1\text{H}$ - and  $^{13}\text{C}$ -NMR spectra of 2,6-di(hetero)aryl dithienothiazines

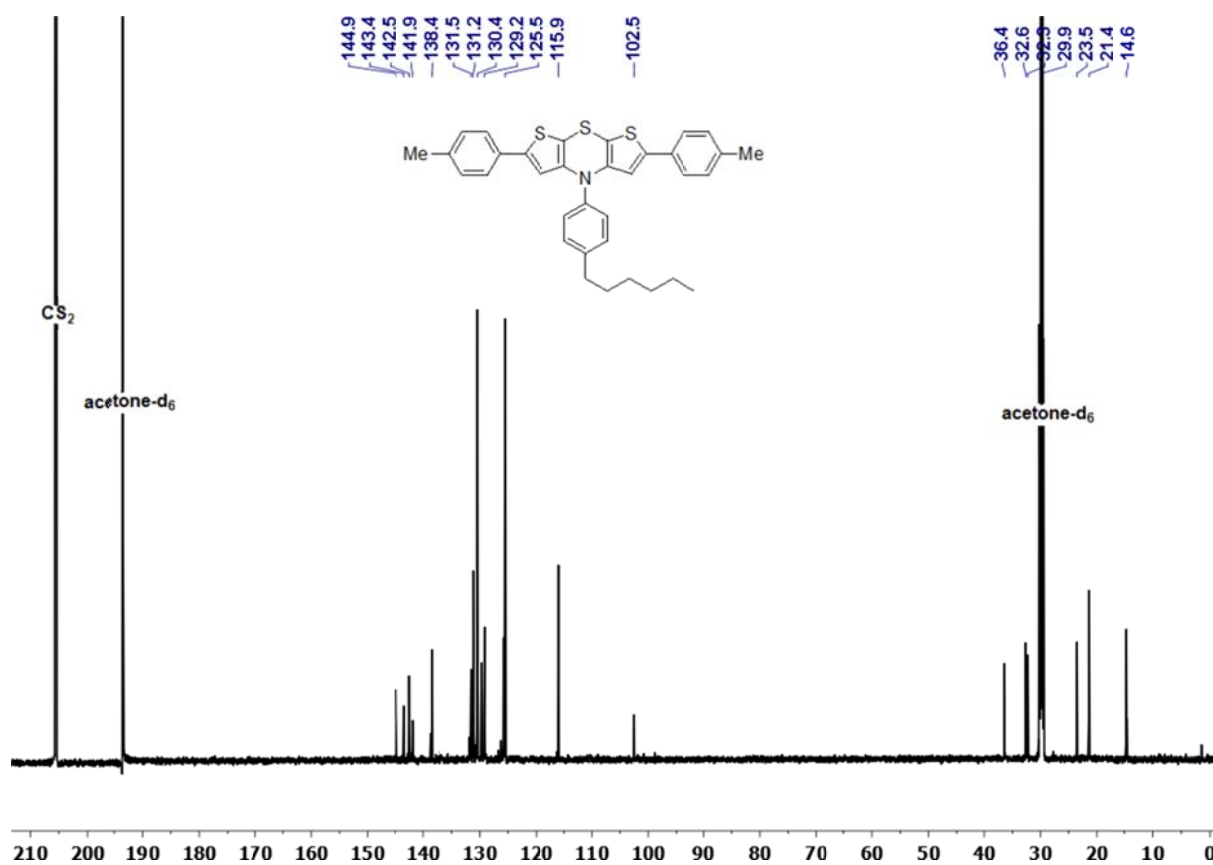

$^{13}\text{C}$ -NMR (150 MHz) of **3b** (20 mg) in acetone- $\text{d}_6$ /CS $_2$  1:1 at 298 K ( $\delta$  in ppm).

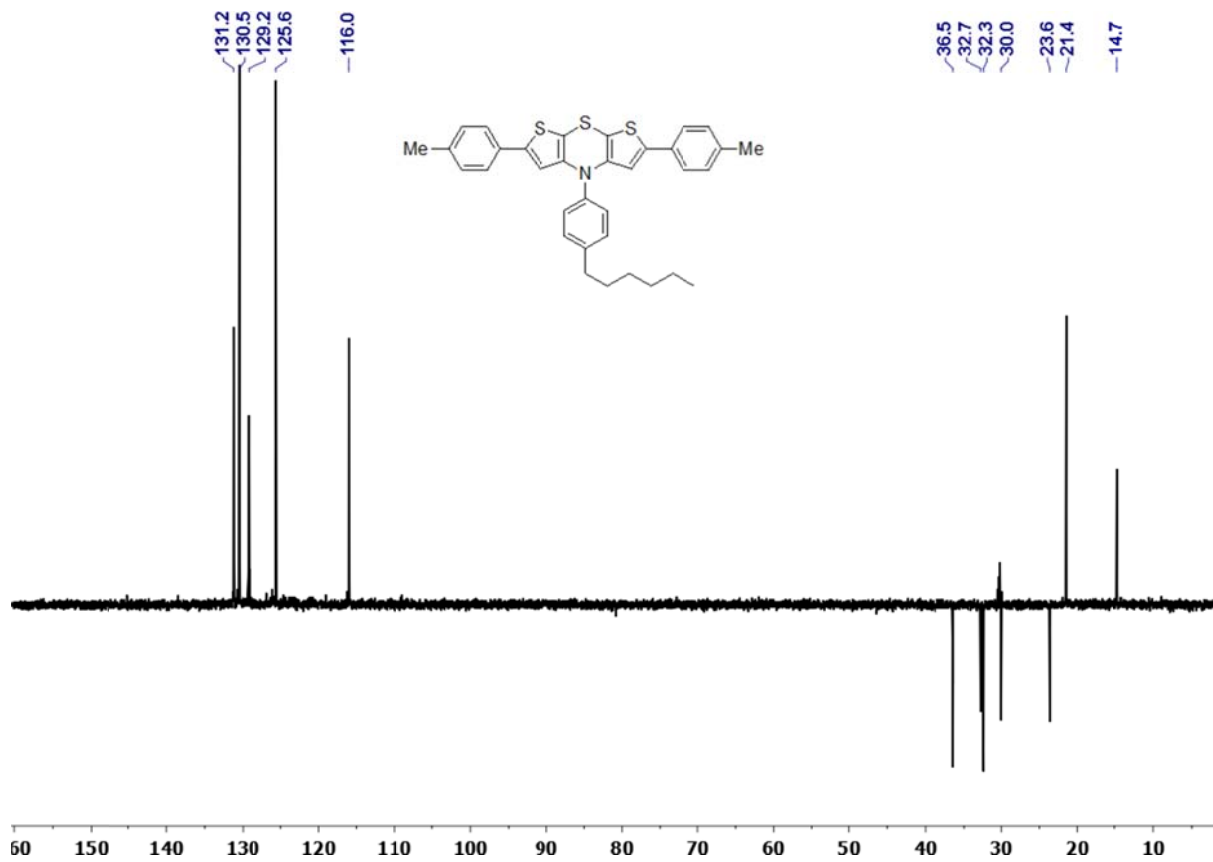

$^{13}\text{C}$ -DEPT 135-NMR (150 MHz) of **3b** (20 mg) in acetone- $\text{d}_6$ /CS $_2$  1:1 at 298 K ( $\delta$  in ppm).

### 1.3 4-(4-Hexylphenyl)-2,6-diphenyl-4H-dithieno[2,3-b:3',2'-e][1,4]thiazine (3c)

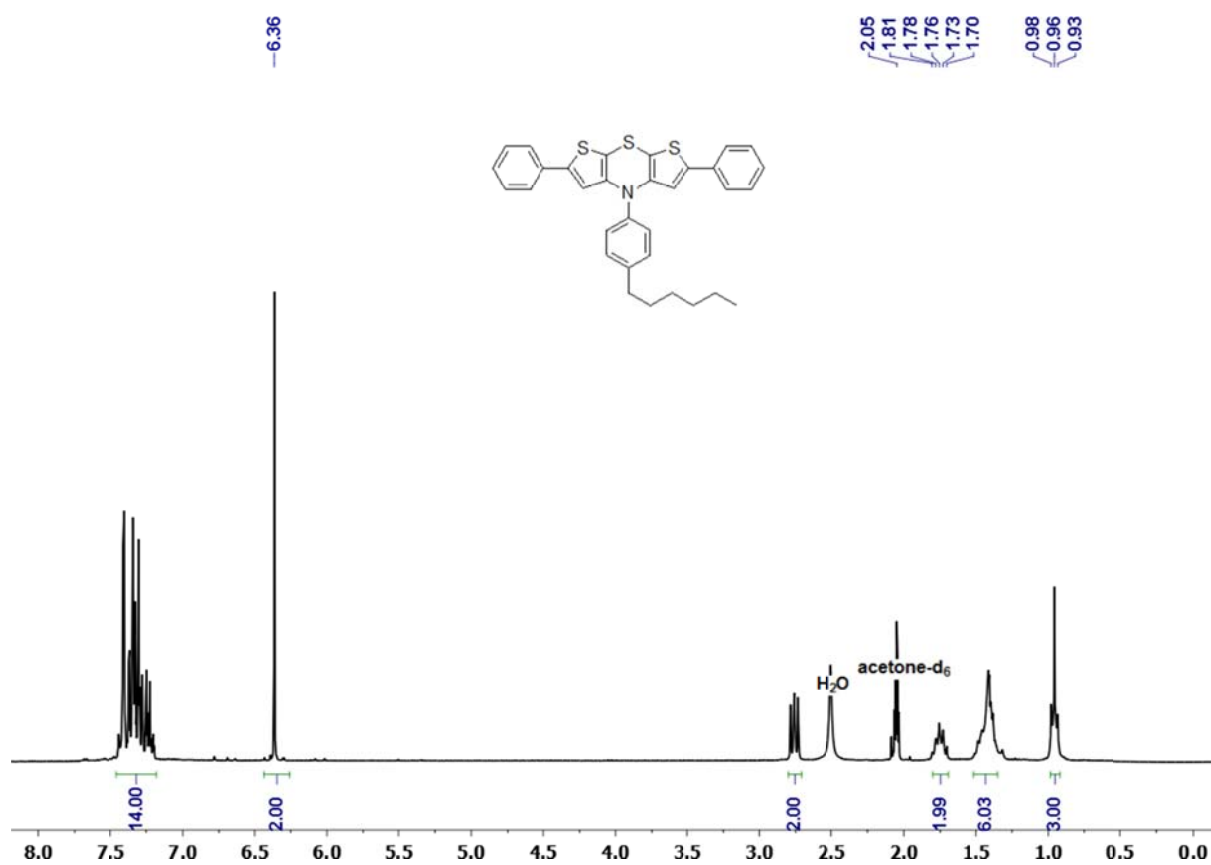

$^1\text{H}$ - and  $^{13}\text{C}$ -NMR spectra of 2,6-di(hetero)aryl dithienothiazines

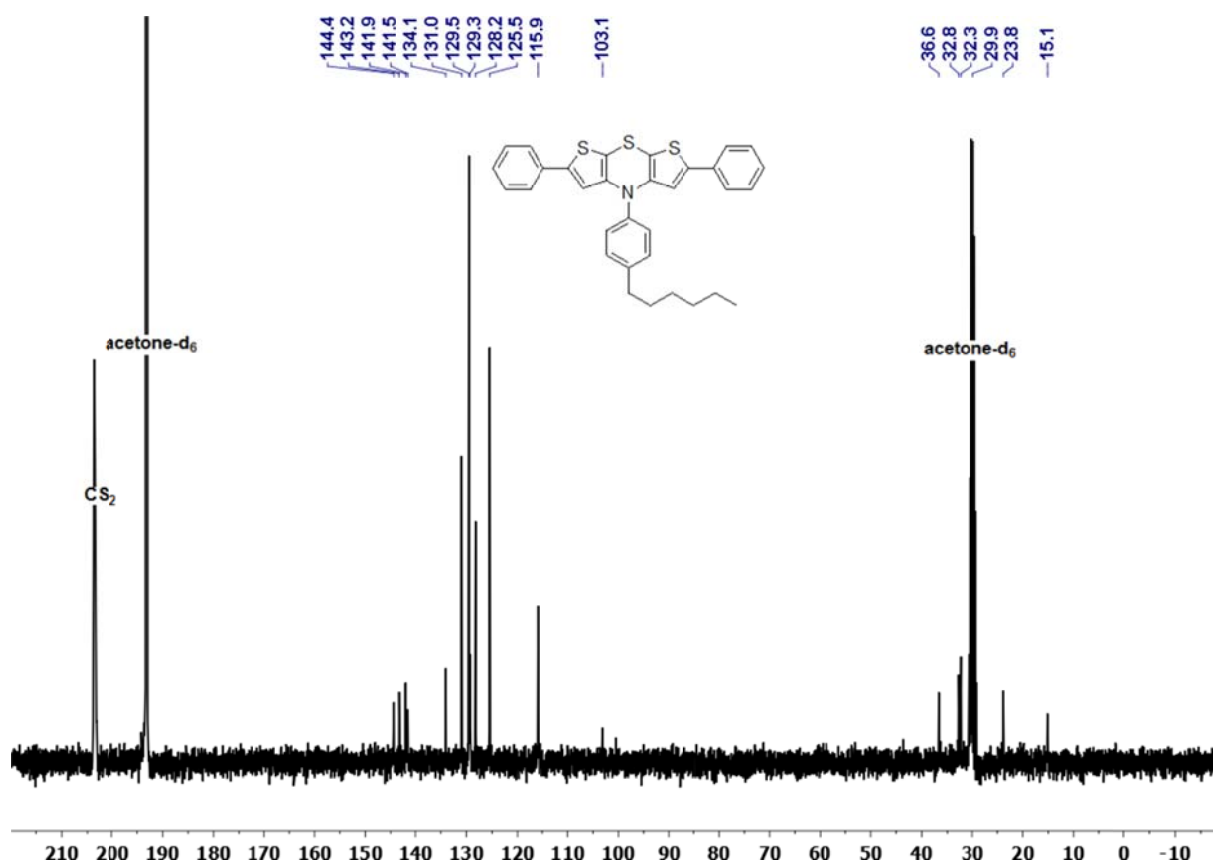

$^{13}\text{C}$ -NMR (75 MHz) of **3c** (20 mg) in acetone- $\text{d}_6$ /CS $_2$  2:1 at 298 K ( $\delta$  in ppm).

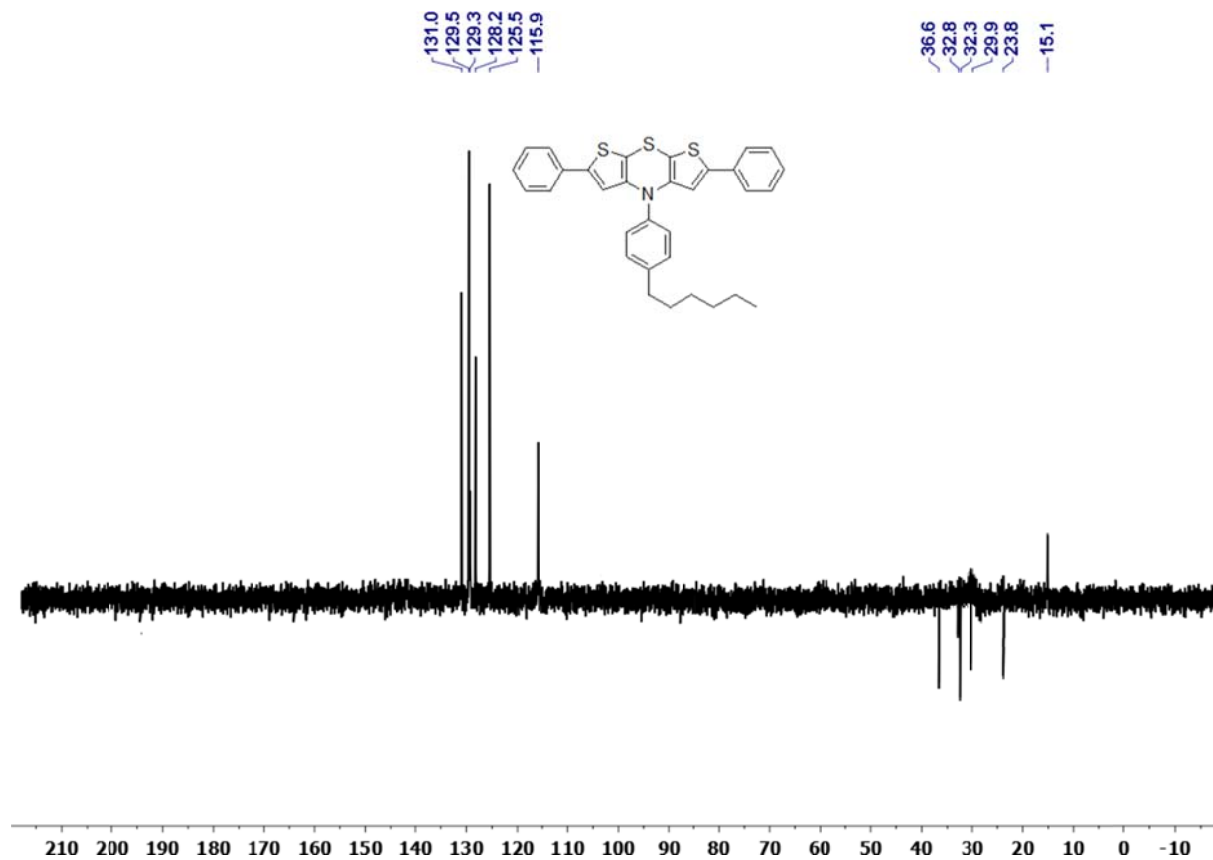

$^{13}\text{C}$ -DEPT 135-NMR (75 MHz) of **3c** (20 mg) in acetone- $\text{d}_6$ /CS $_2$  2:1 at 298 K ( $\delta$  in ppm).



**1.4 2,6-Bis(4-chlorophenyl)-4-(4-hexylphenyl)-4H-dithieno[2,3-b:3',2'-e][1,4]thiazine (3d)**

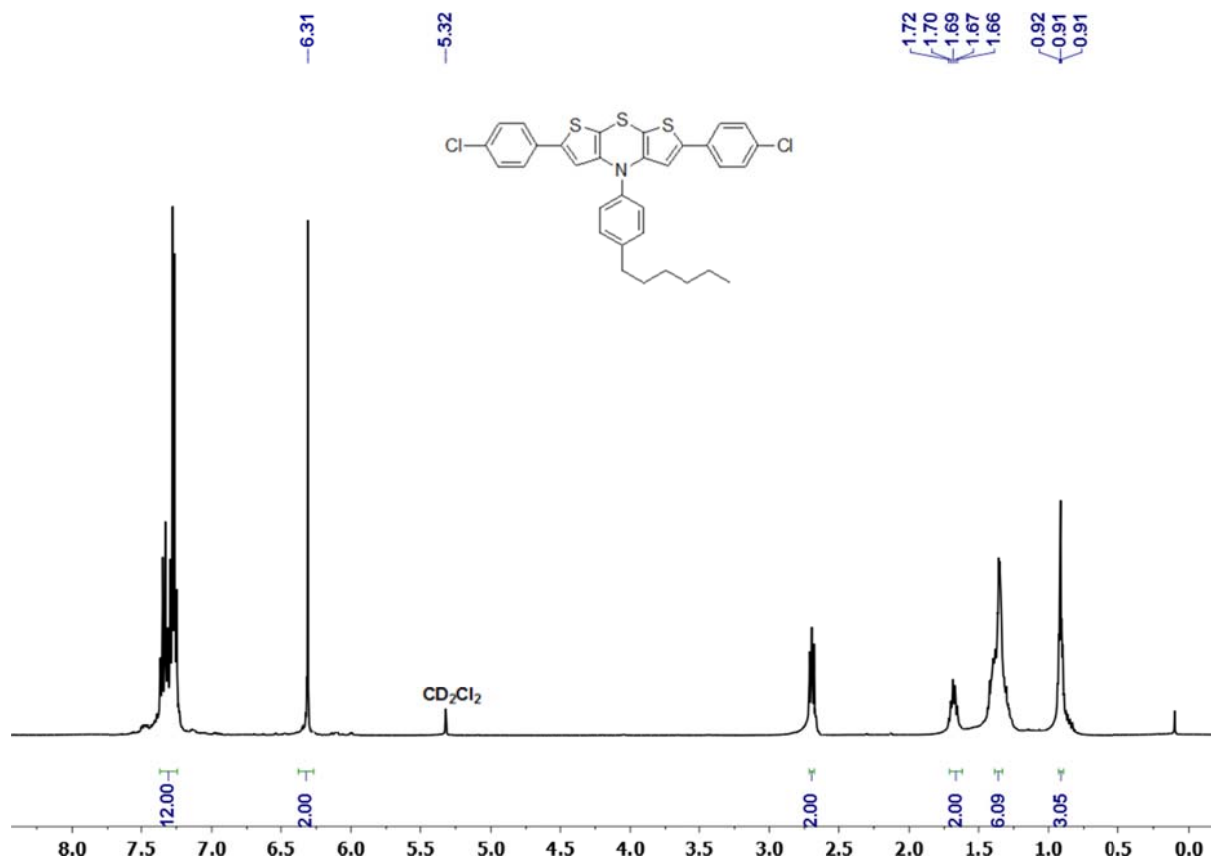

$^1\text{H}$ -NMR (500 MHz) of **3d** (20 mg) in dichloromethane- $d_2$  at 298 K ( $\delta$  in ppm).

$^1\text{H}$ - and  $^{13}\text{C}$ -NMR spectra of 2,6-di(hetero)aryl dithienothiazines

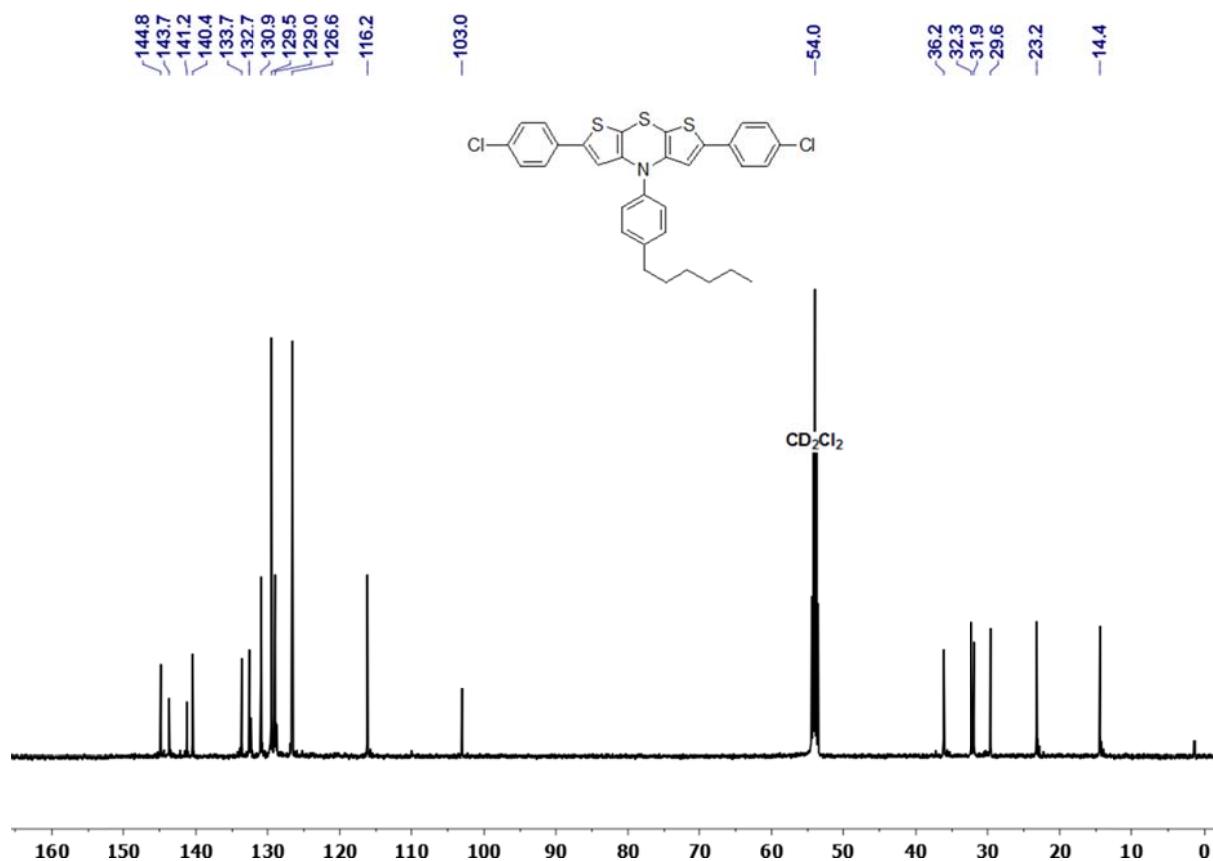

$^{13}\text{C}$ -NMR (125 MHz) of **3d** (20 mg) in dichloromethane- $d_2$  at 298 K ( $\delta$  in ppm).

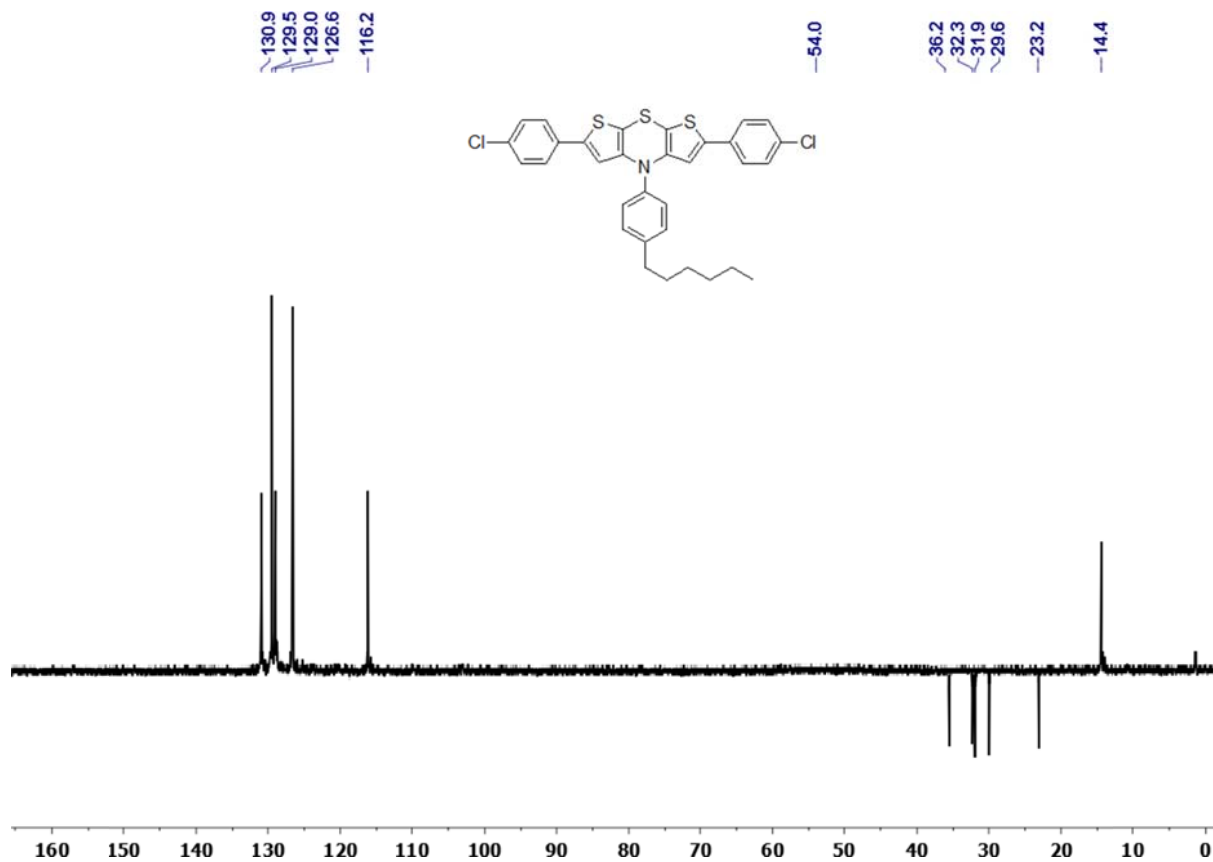

$^{13}\text{C}$ -DEPT 135-NMR (125 MHz) of **3d** (20 mg) in dichloromethane- $d_2$  at 298 K ( $\delta$  in ppm).

**1.5 Dimethyl 4,4'-(4-(4-hexylphenyl)-4H-dithieno[2,3-b:3',2'-e][1,4]thiazine-2,6-diyl)dibenzoate (3e)**

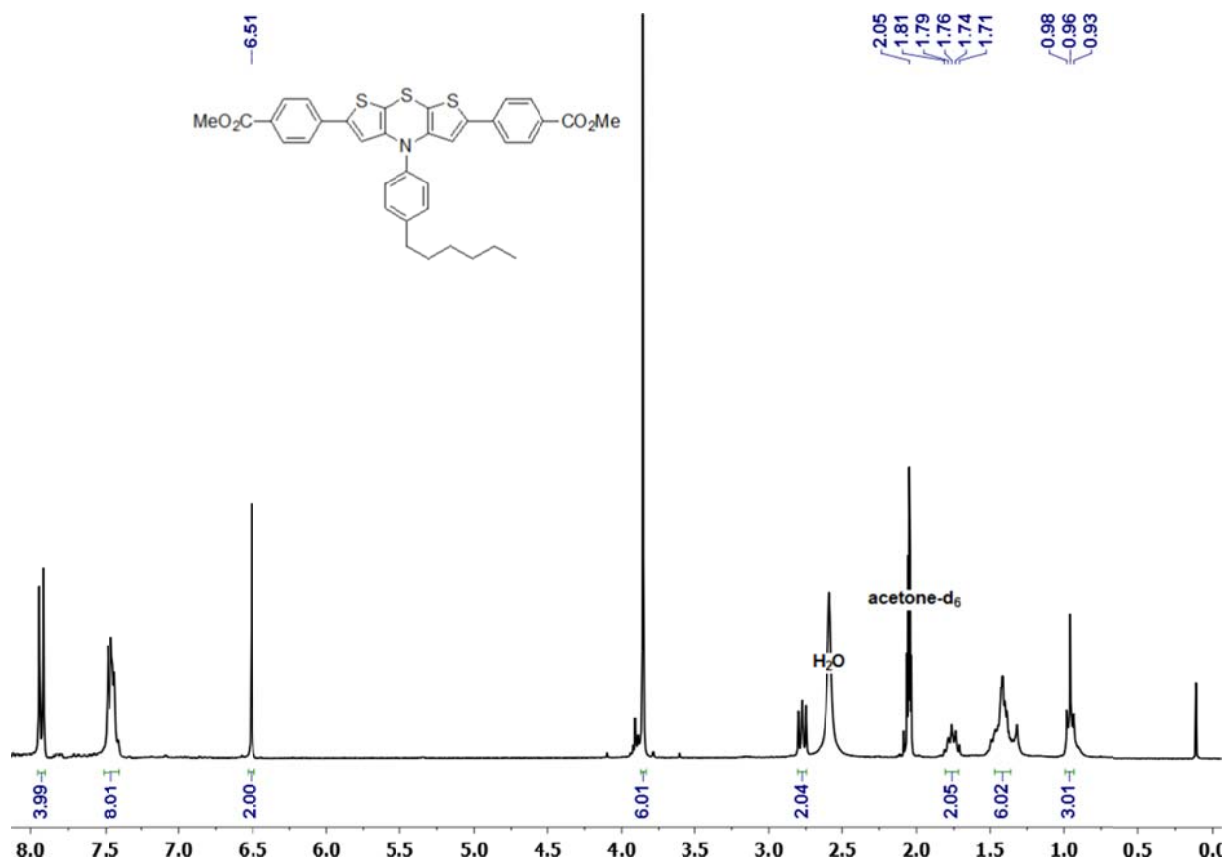

$^1\text{H}$ -NMR (300 MHz) of **3e** (20 mg) in acetone- $\text{d}_6/\text{CS}_2$  1:1 at 293 K ( $\delta$  in ppm).

$^1\text{H}$ - and  $^{13}\text{C}$ -NMR spectra of 2,6-di(hetero)aryl dithienothiazines

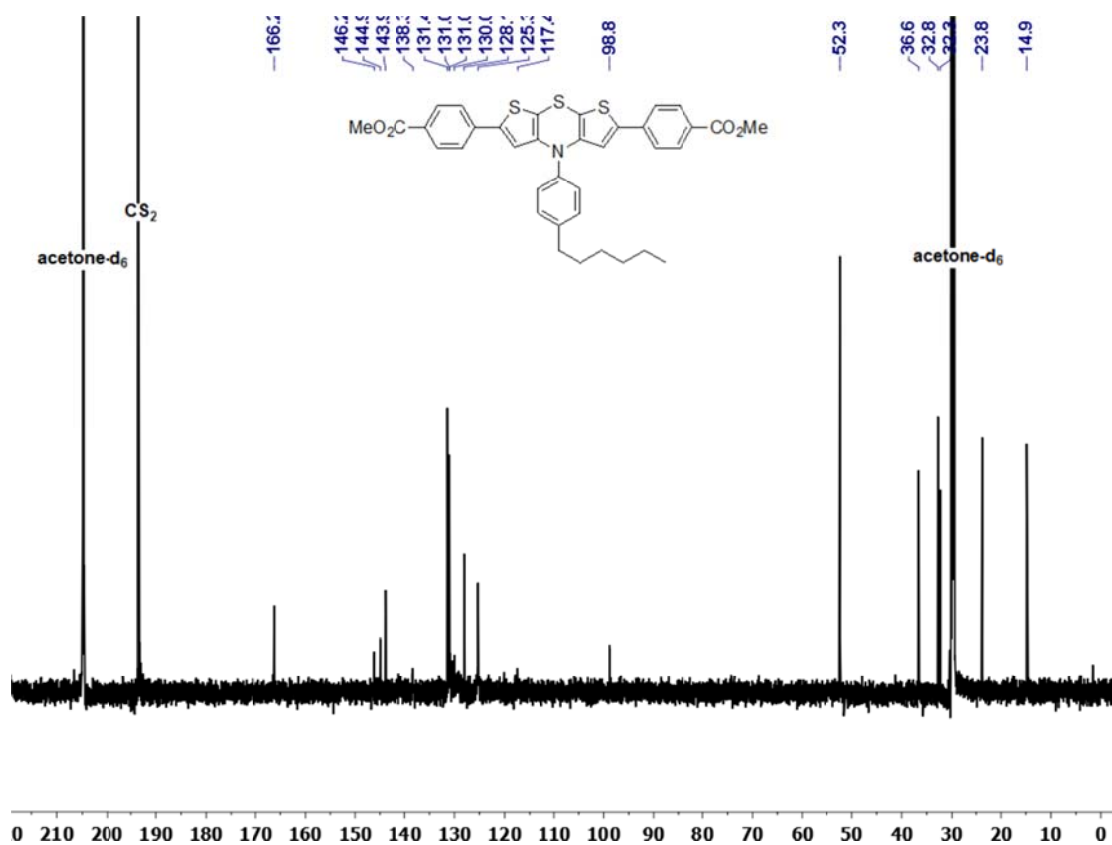

$^{13}\text{C}$ -NMR (75 MHz) of **3e** (20 mg) in acetone- $\text{d}_6$ / $\text{CS}_2$  1:1 at 293 K ( $\delta$  in ppm).

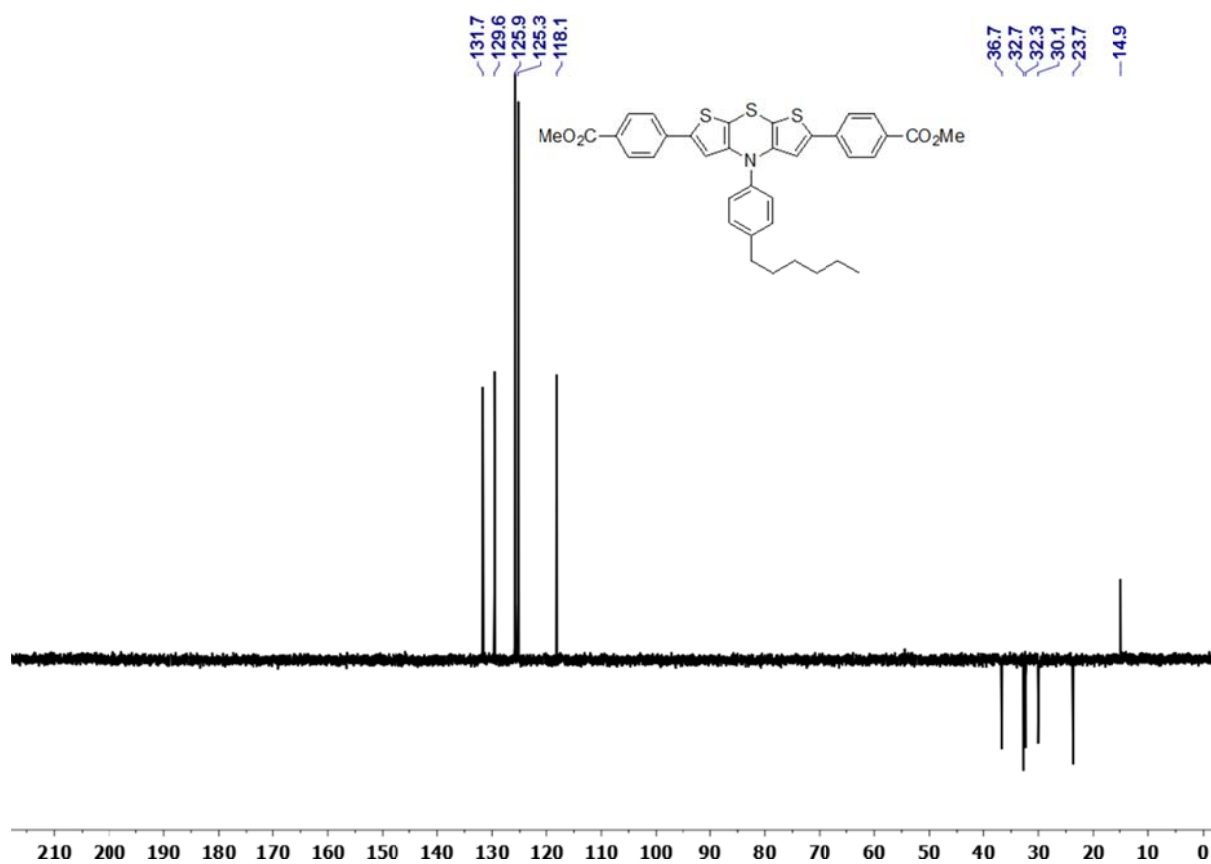

$^{13}\text{C}$ -DEPT 135-NMR (75 MHz) of **3e** (20mg) in acetone- $\text{d}_6$ / $\text{CS}_2$  1:1 at 293 K ( $\delta$  in ppm).

**1.6 4-(4-Hexylphenyl)-2,6-bis(4-(trifluoromethyl)phenyl)-4H-dithieno[2,3-b:3',2'-e][1,4]thiazine (3f)**

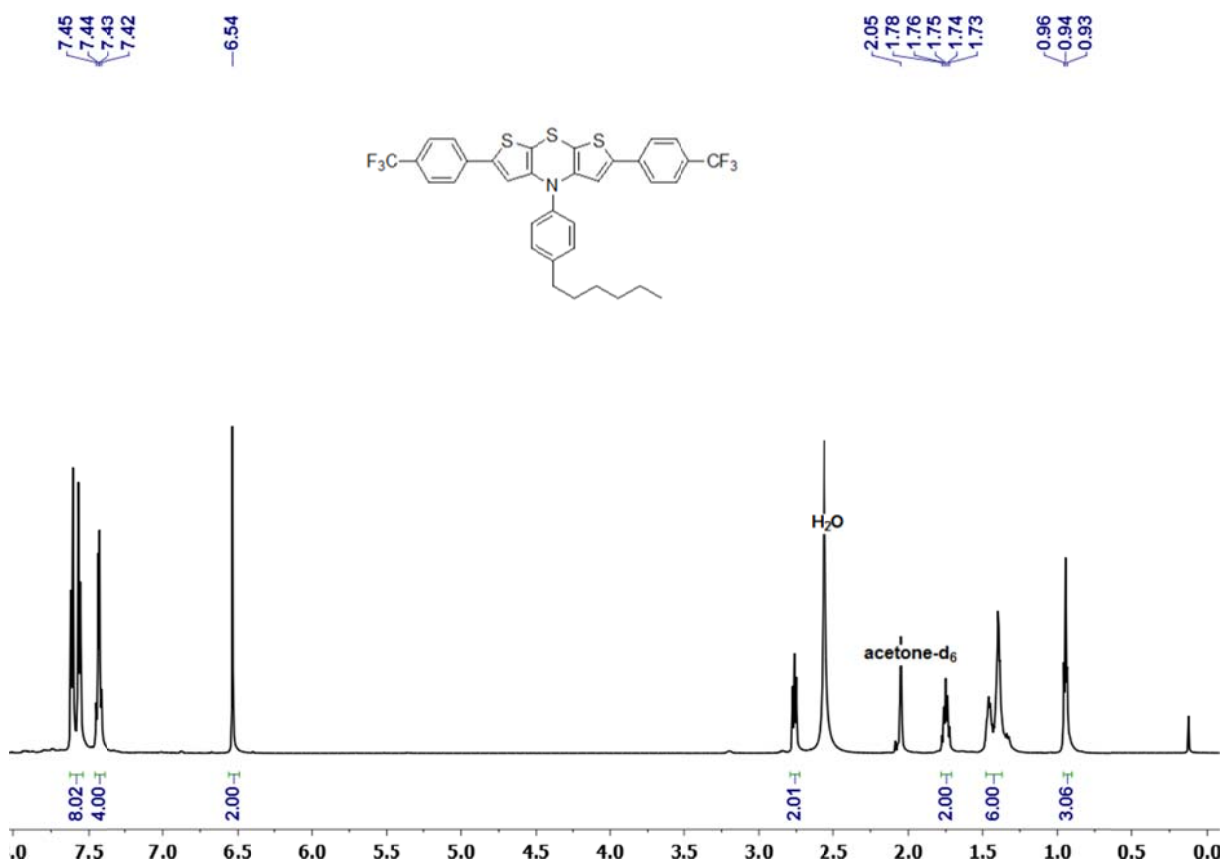

$^1\text{H}$ - and  $^{13}\text{C}$ -NMR spectra of 2,6-di(hetero)aryl dithienothiazines

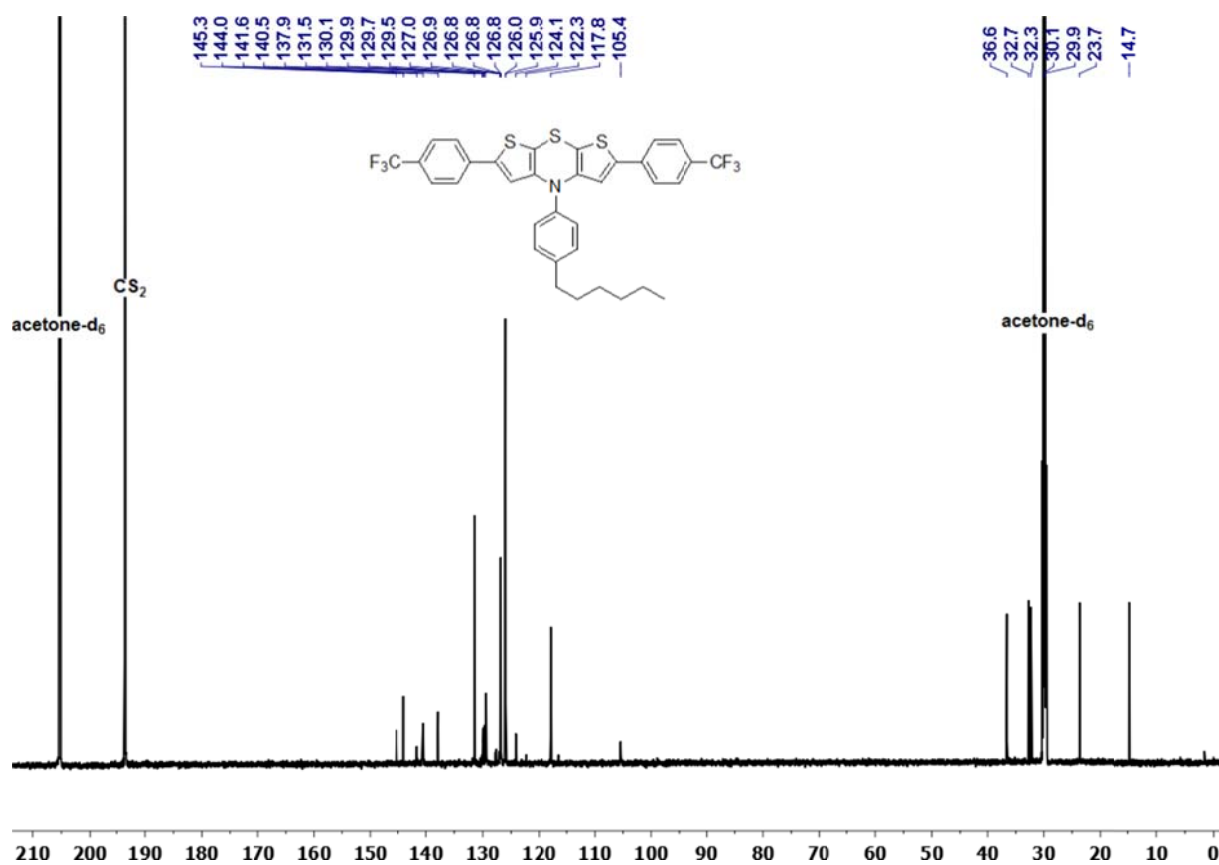

$^{13}\text{C}$ -NMR (150 MHz) of **3f** (20 mg) in acetone- $\text{d}_6/\text{CS}_2$  1:1 at 313 K ( $\delta$  in ppm).

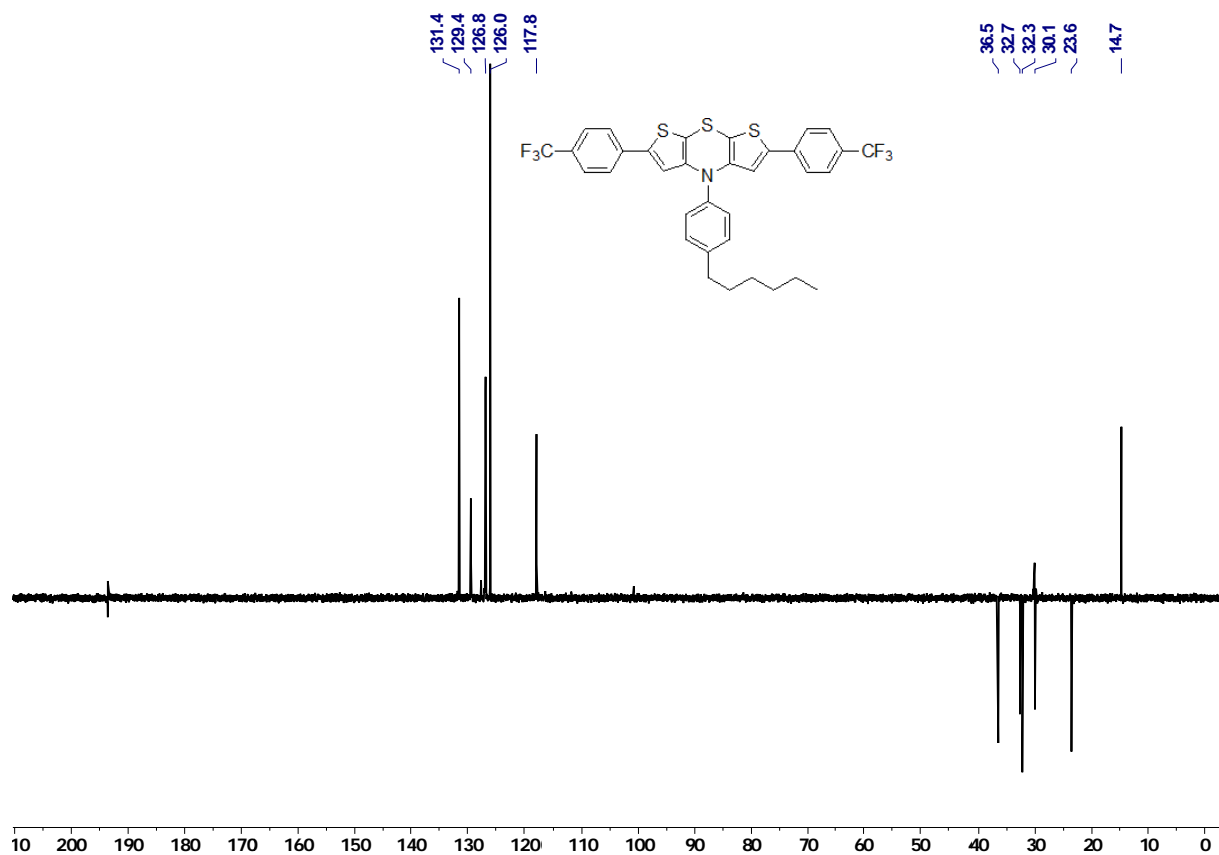

$^{13}\text{C}$ -DEPT 135-NMR (150 MHz) of **3f** (20 mg) in acetone- $\text{d}_6/\text{CS}_2$  1:1 at 313 K ( $\delta$  in ppm).

**1.7 4,4'-(4-(4-Hexylphenyl)-4H-dithieno[2,3-b:3',2'-e][1,4]thiazine-2,6-diyl)dibenzonitrile (3g)**

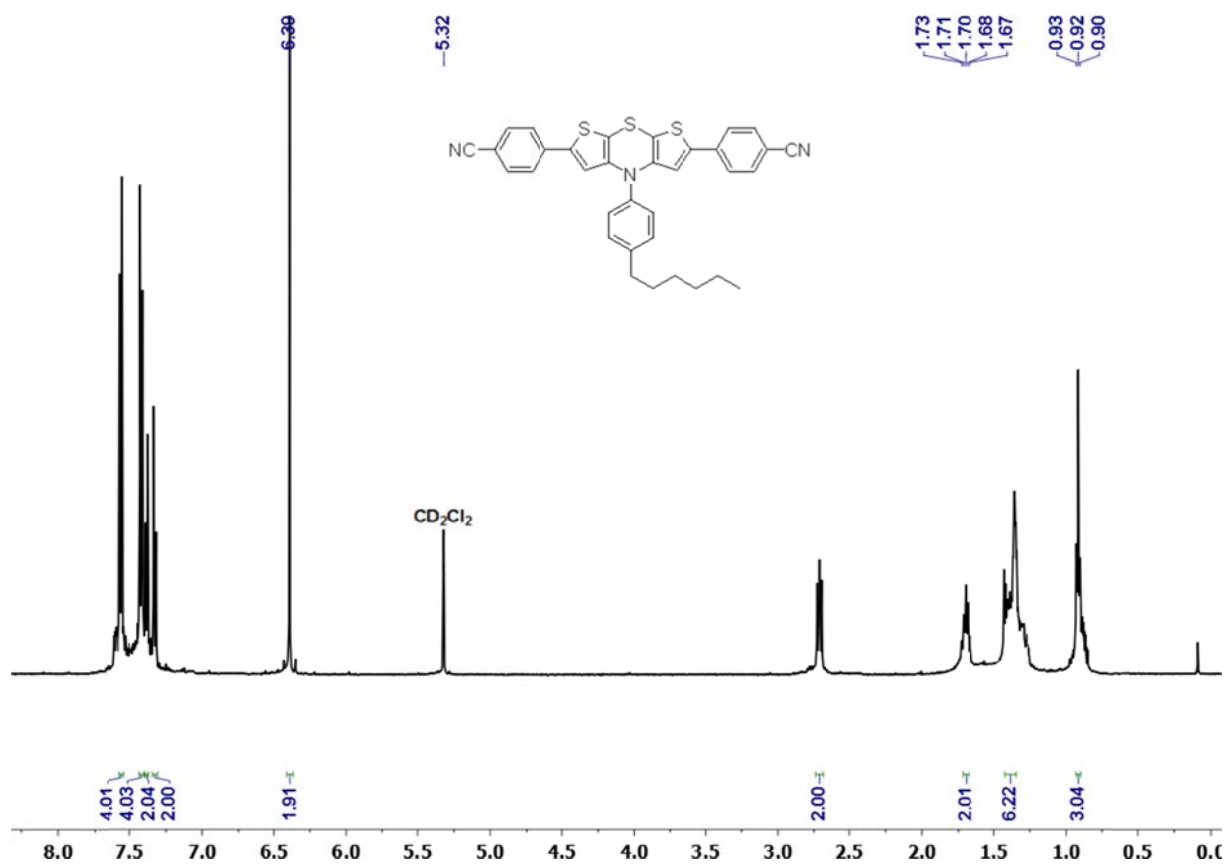

$^1\text{H}$ -NMR (600 MHz) of **3g** (20 mg) in dichloromethane- $d_2$  at 293 K ( $\delta$  in ppm).

$^1\text{H}$ - and  $^{13}\text{C}$ -NMR spectra of 2,6-di(hetero)aryl dithienothiazines

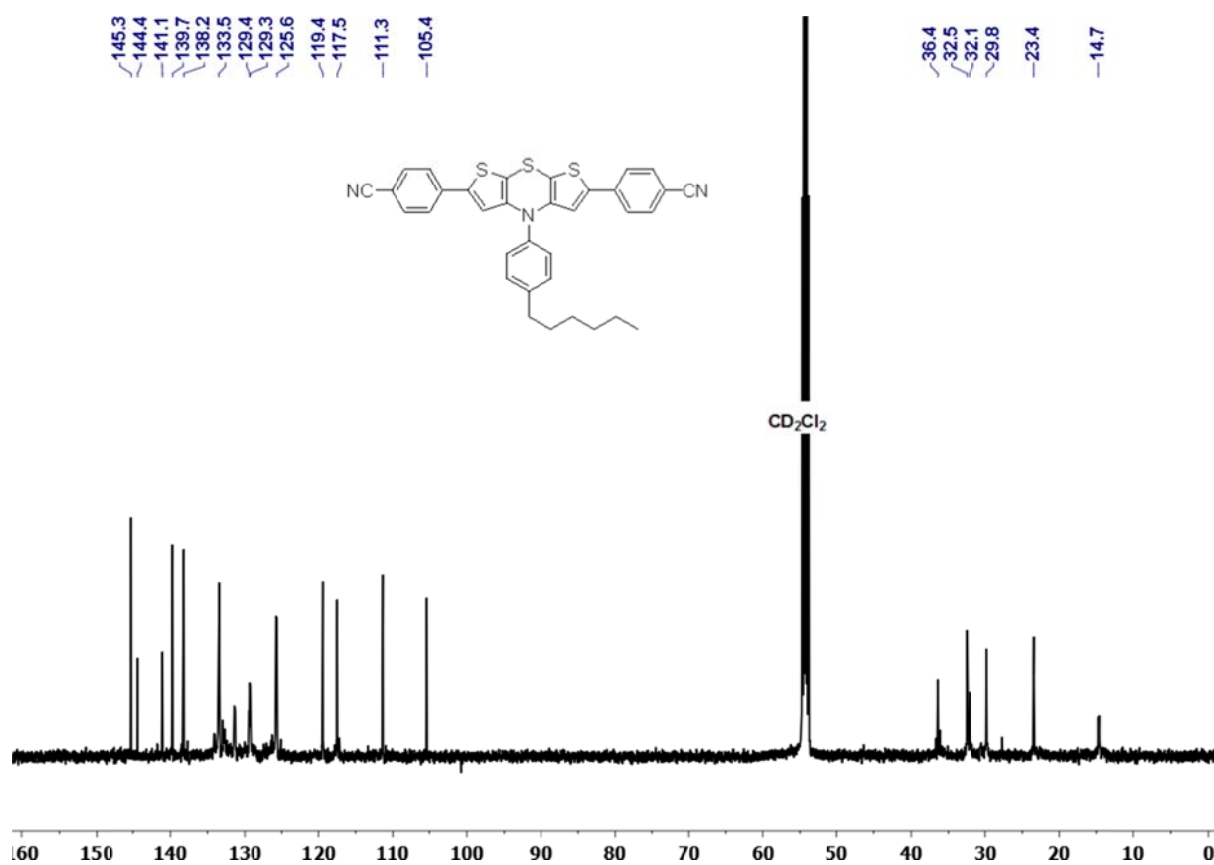

$^{13}\text{C}$ -NMR (150 MHz) of **3g** (20 mg) in dichloromethane- $d_2$  at 298 K ( $\delta$  in ppm).

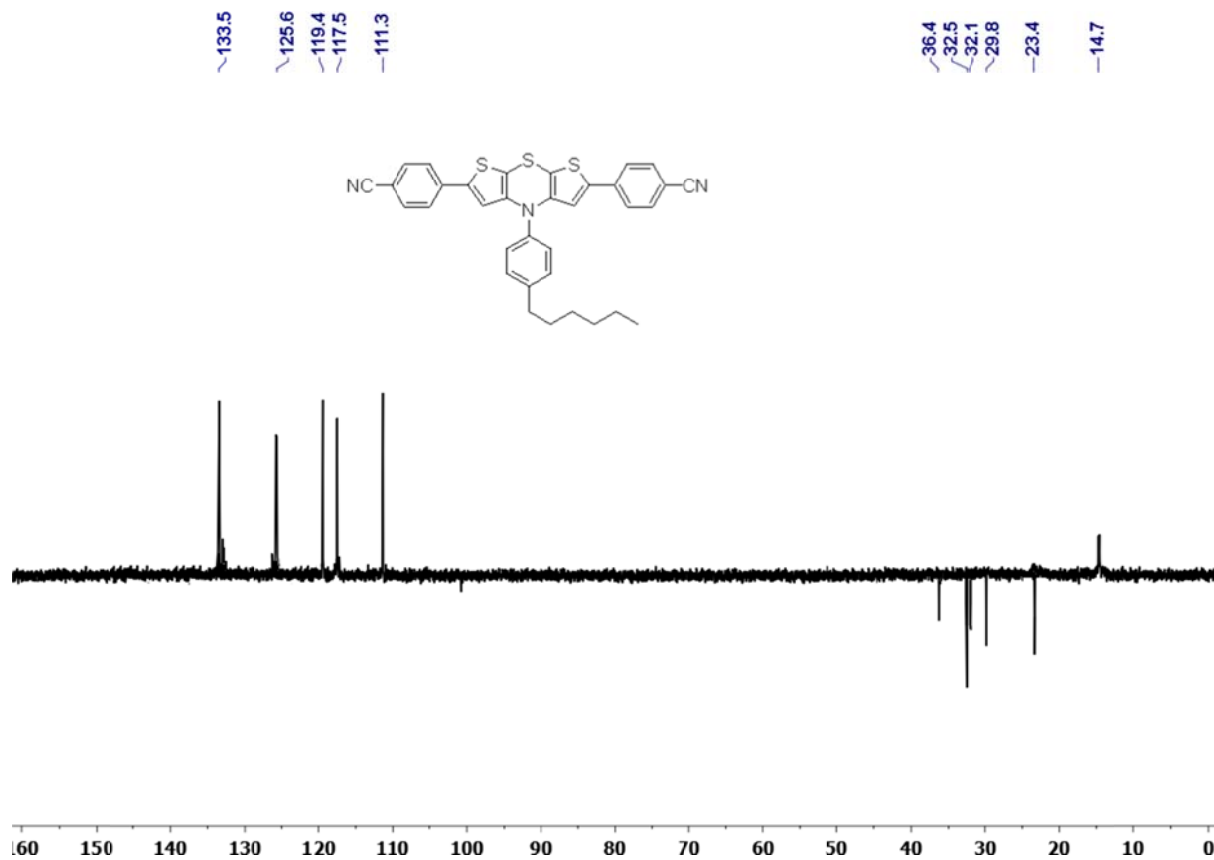

$^{13}\text{C}$ -DEPT 135-NMR (150 MHz) of **3g** (20 mg) in dichloromethane- $d_2$  at 313 K ( $\delta$  in ppm).



**1.8 4-(4-Hexylphenyl)-2,6-bis(4-nitrophenyl)-4H-dithieno[2,3-b:3',2'-e][1,4]thiazine (3h)**

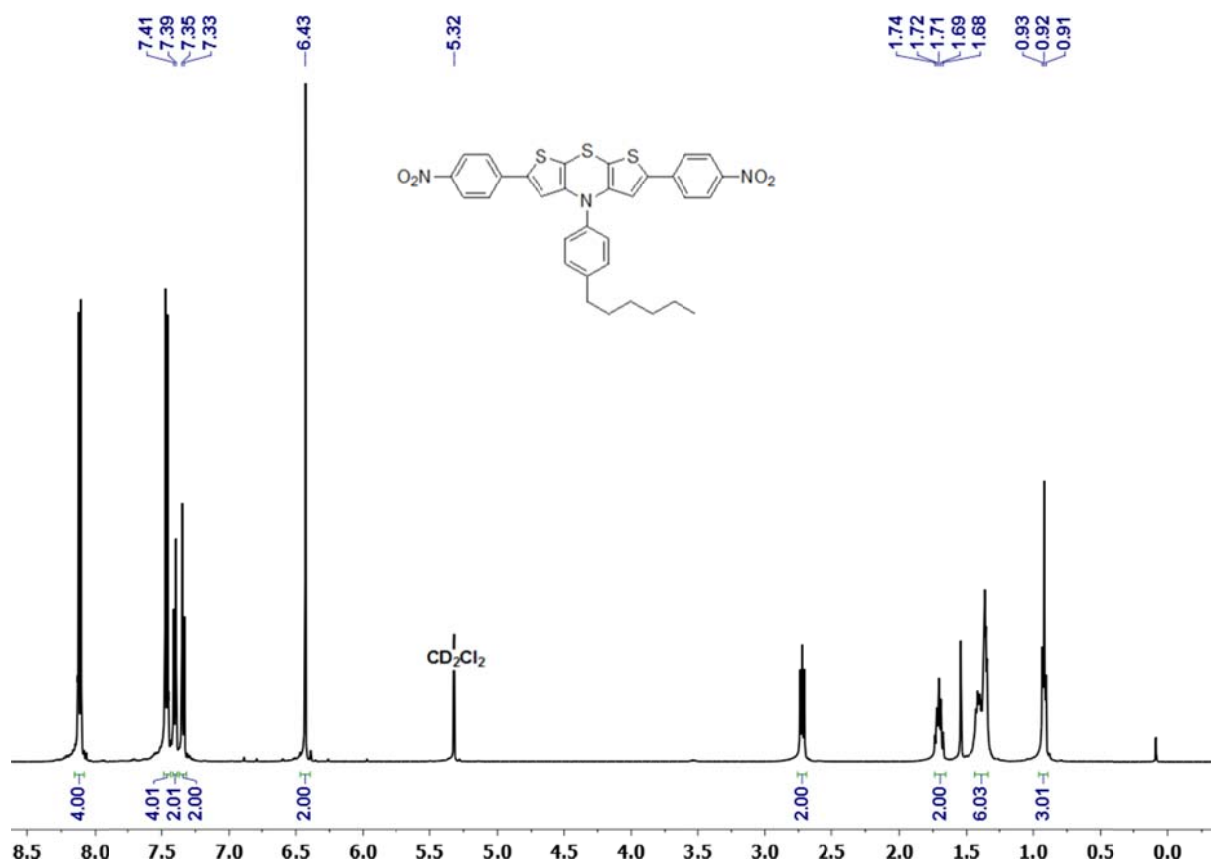

$^1\text{H}$ -NMR (500 MHz) of **3f** (20 mg) in dichloromethane- $d_2$  at 298 K ( $\delta$  in ppm).

$^1\text{H}$ - and  $^{13}\text{C}$ -NMR spectra of 2,6-di(hetero)aryl dithienothiazines

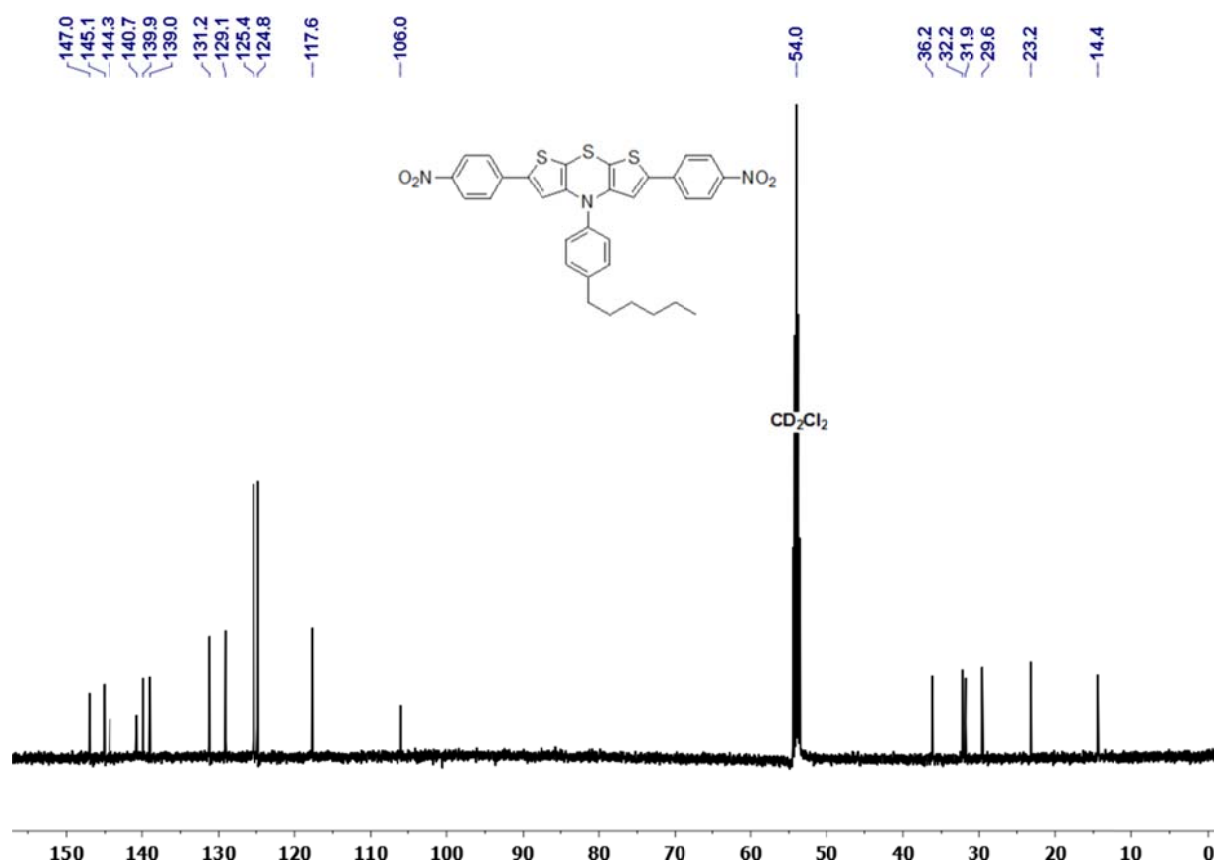

$^{13}\text{C}$ -NMR (125 MHz) of **3f** (20 mg) in dichloromethane- $d_2$  at 298 K ( $\delta$  in ppm).

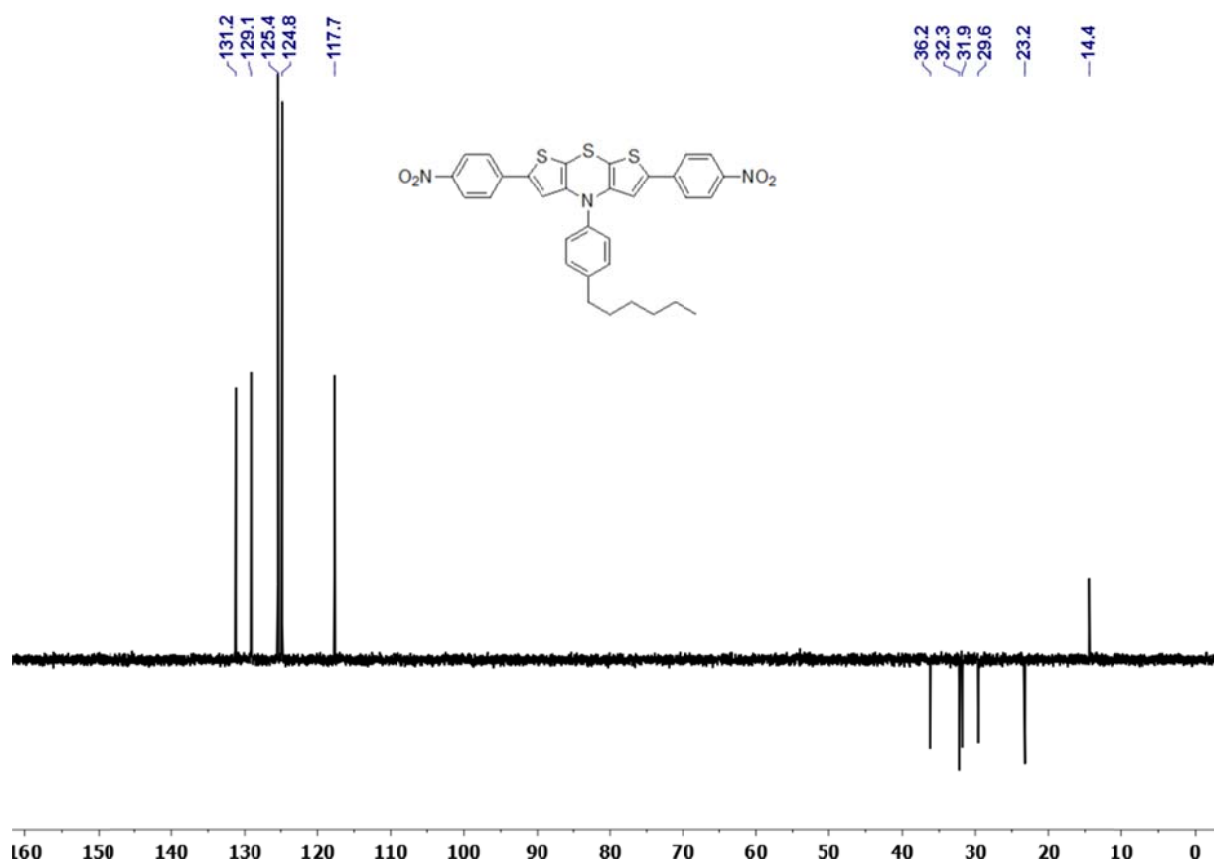

$^{13}\text{C}$ -DEPT 135-NMR (125 MHz) of **3f** (20 mg) in dichloromethane- $d_2$  at 298 K ( $\delta$  in ppm).

**1.9 4-(4-Hexylphenyl)-2,6-bis(3-nitrophenyl)-4H-dithieno[2,3-b:3',2'-e][1,4]thiazine (3i)**

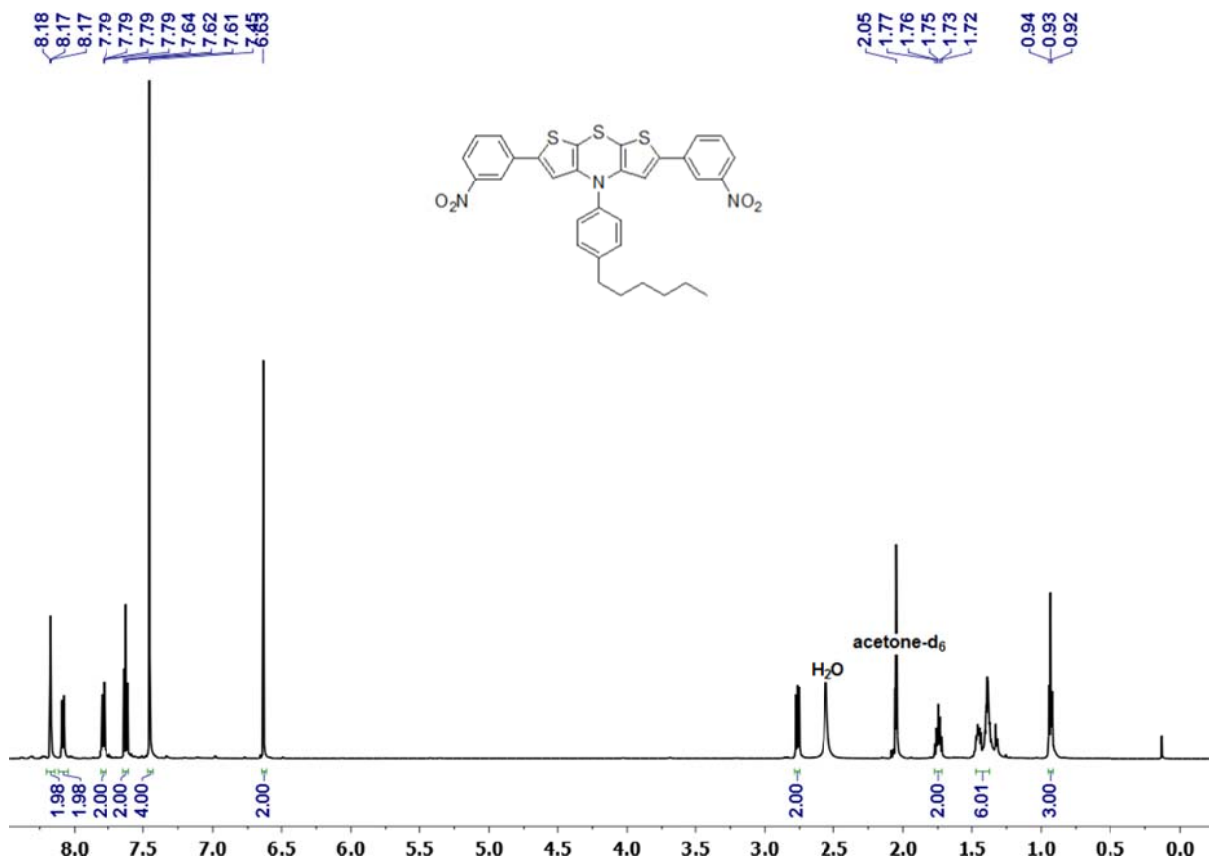

$^1\text{H}$ -NMR (600 MHz) of **3i** (20 mg) in acetone- $\text{d}_6$ / $\text{CS}_2$  1:1 at 313 K ( $\delta$  in ppm).

$^1\text{H}$ - and  $^{13}\text{C}$ -NMR spectra of 2,6-di(hetero)aryl dithienothiazines

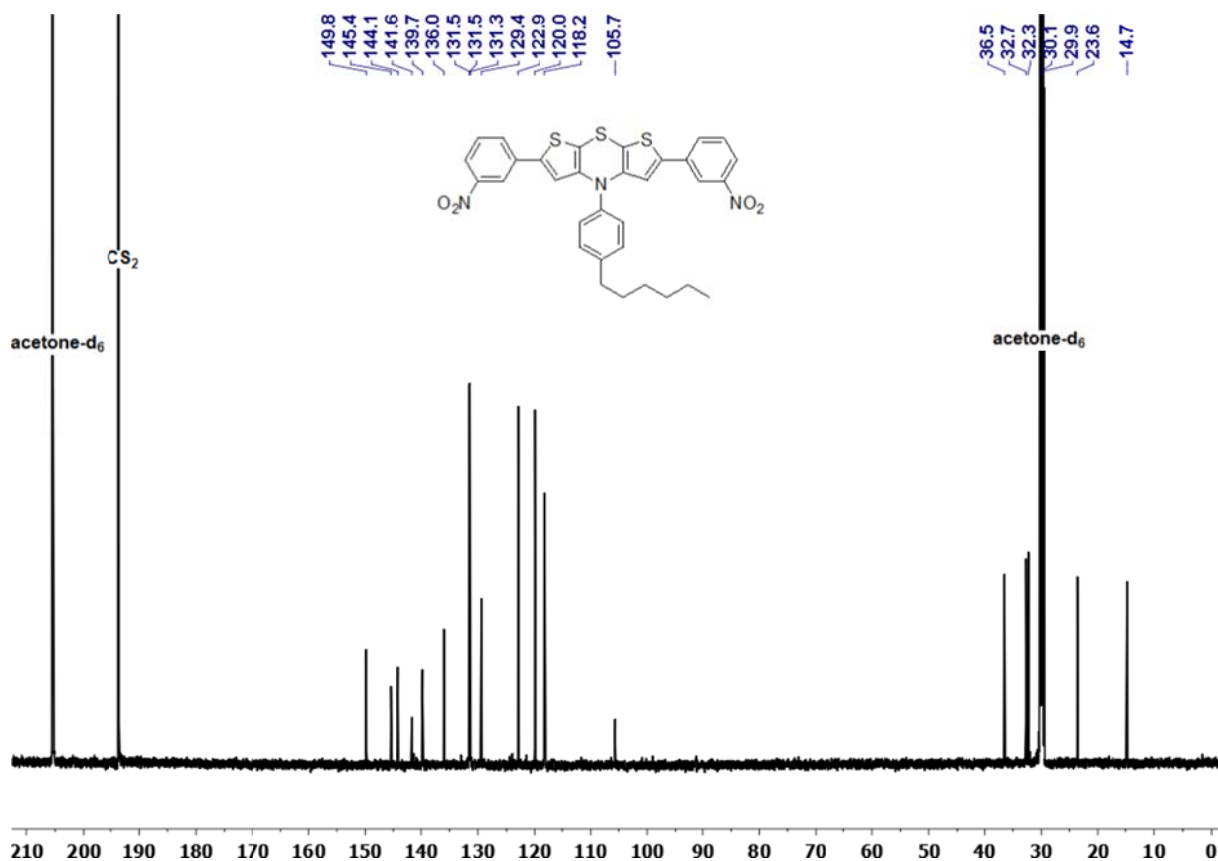

$^{13}\text{C}$ -NMR (150 MHz) of **3i** (20 mg) in acetone- $\text{d}_6$ /CS $_2$  1:1 at 313 K ( $\delta$  in ppm).

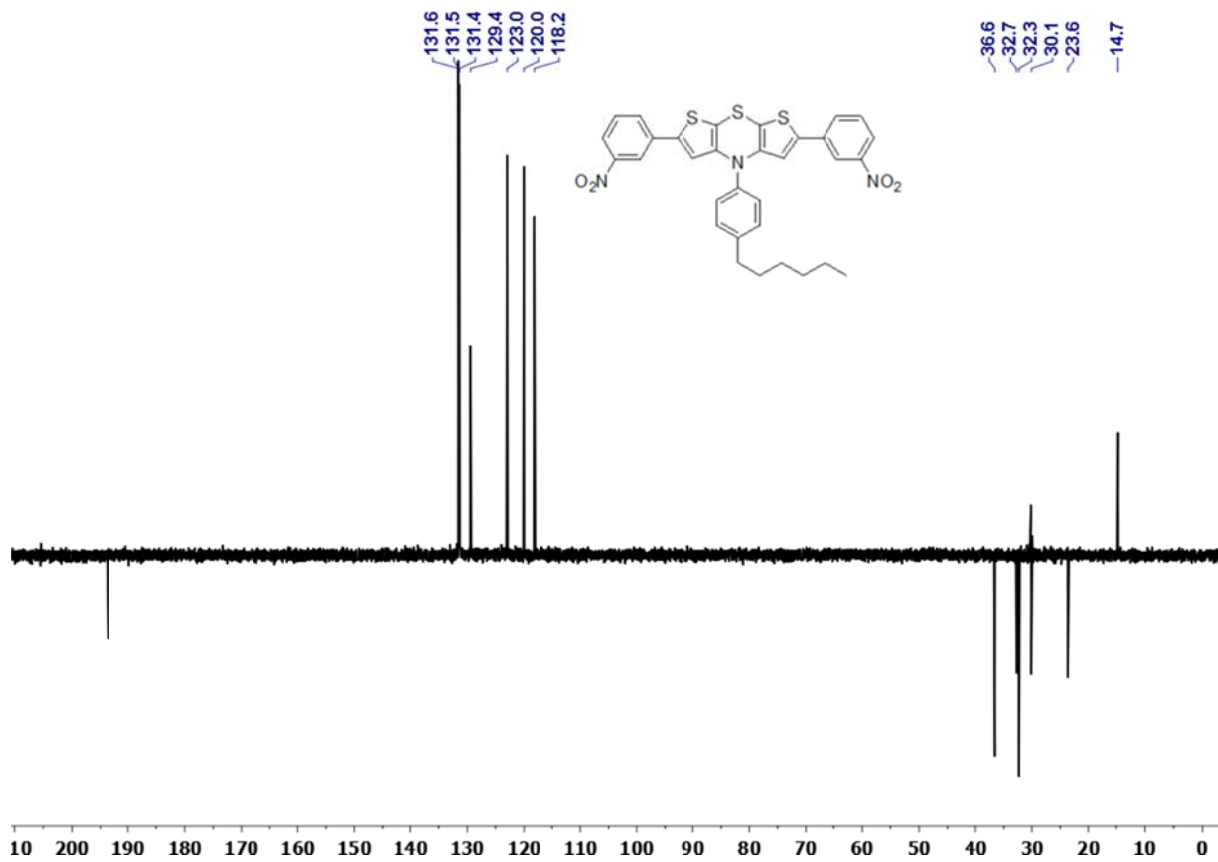

$^{13}\text{C}$ -DEPT 135-NMR (150 MHz) of **3i** (20 mg) in acetone- $\text{d}_6$ /CS $_2$  1:1 at 313 K ( $\delta$  in ppm).

**1.10 4-(4-Hexylphenyl)-2,6-bis(2-nitrophenyl)-4H-dithieno[2,3-b:3',2'-e][1,4]thiazine (3j)**

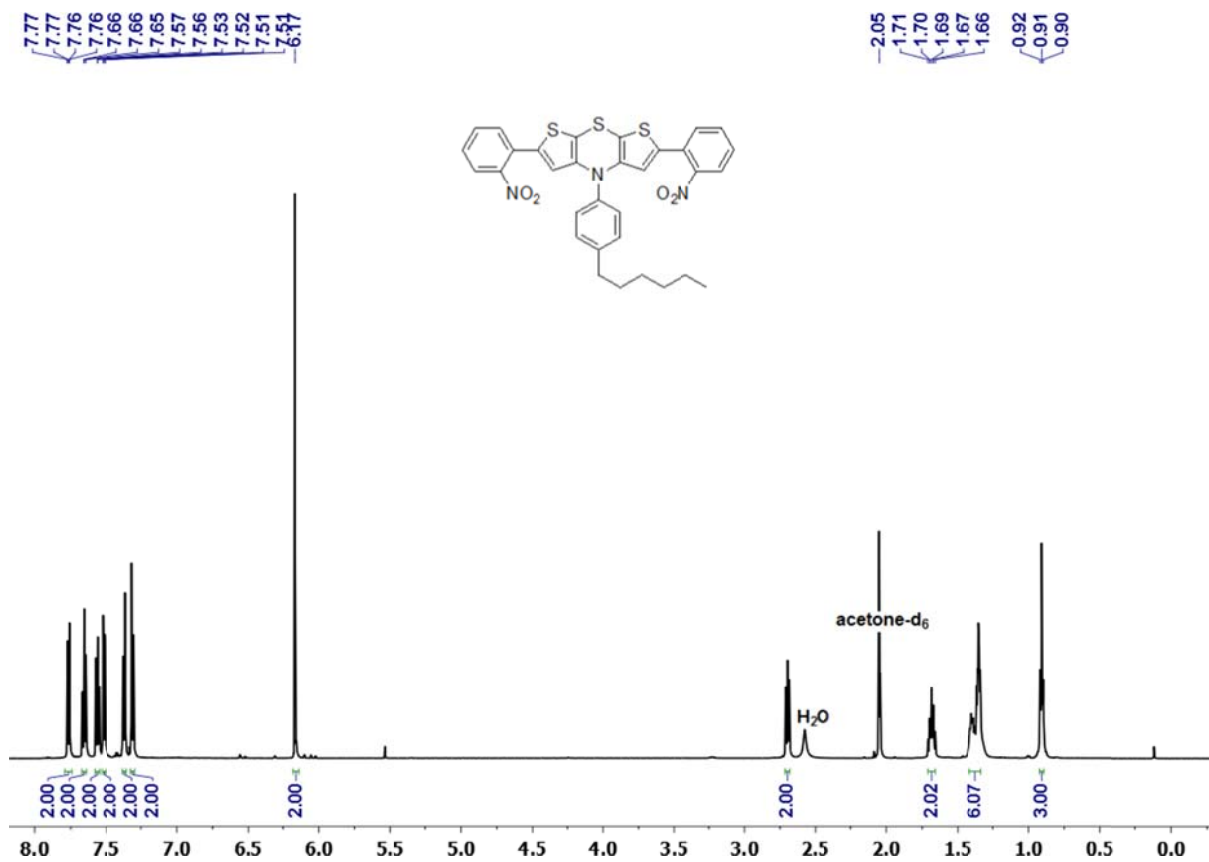

$^1\text{H}$ -NMR (600 MHz) of **3j** (20 mg) in acetone- $\text{d}_6$ / $\text{CS}_2$  1:1 at 298 K ( $\delta$  in ppm).

$^1\text{H}$ - and  $^{13}\text{C}$ -NMR spectra of 2,6-di(hetero)aryl dithienothiazines

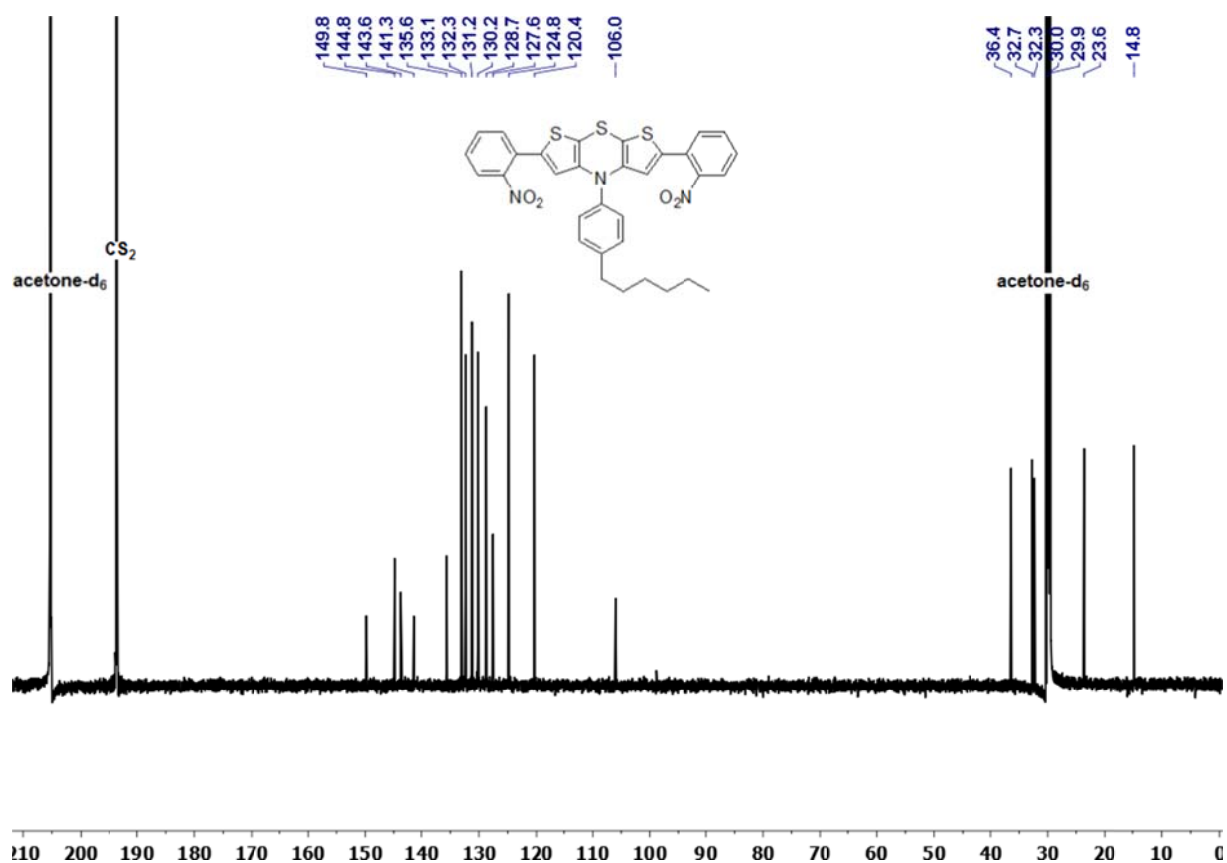

$^{13}\text{C}$ -NMR (150 MHz) of **3j** (20 mg) in acetone- $\text{d}_6$ / $\text{CS}_2$  1:1 at 298 K ( $\delta$  in ppm).

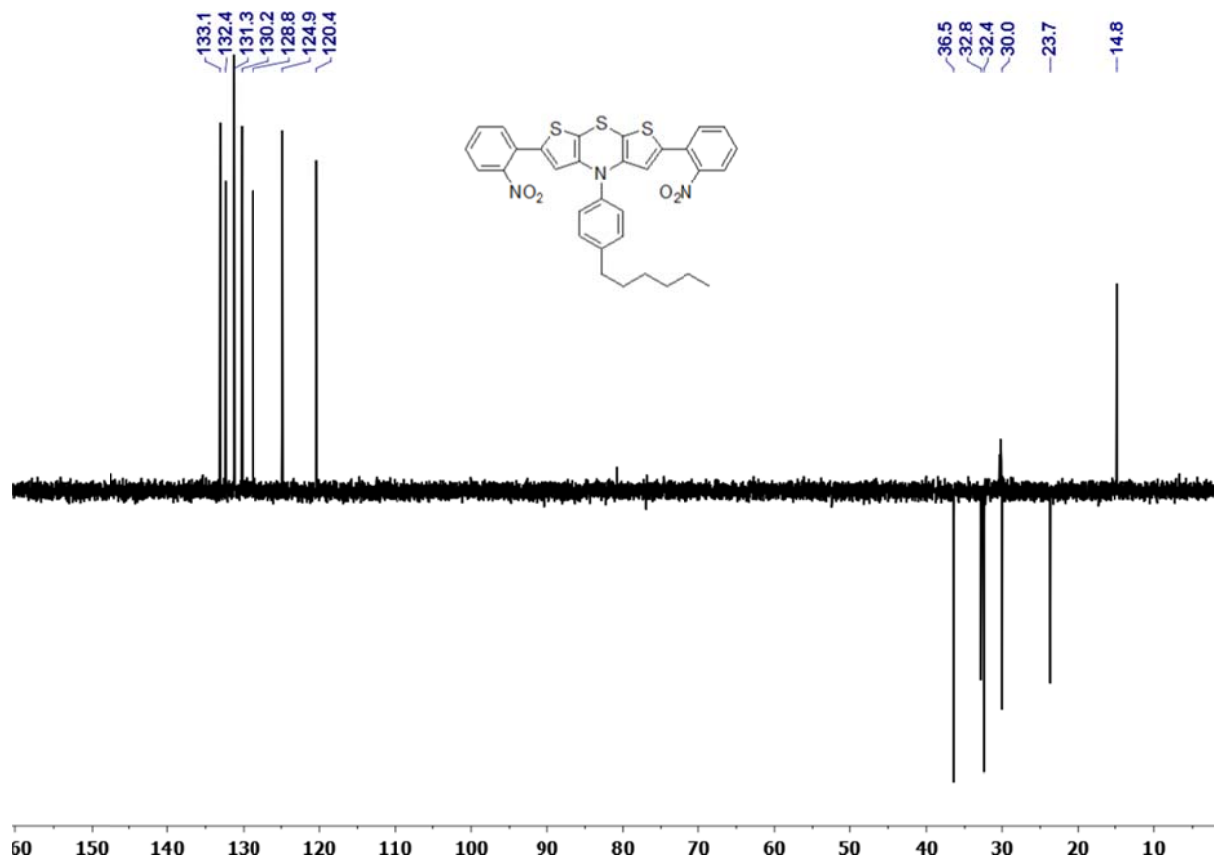

$^{13}\text{C}$ -DEPT 135-NMR (150 MHz) of **3j** (20 mg) in acetone- $\text{d}_6$ / $\text{CS}_2$  1:1 at 298 K ( $\delta$  in ppm).

**1.11 4-(4-Hexylphenyl)-2,6-di(pyridin-3-yl)-4H-dithieno[2,3-b:3',2'-e][1,4]thiazine (3k)**

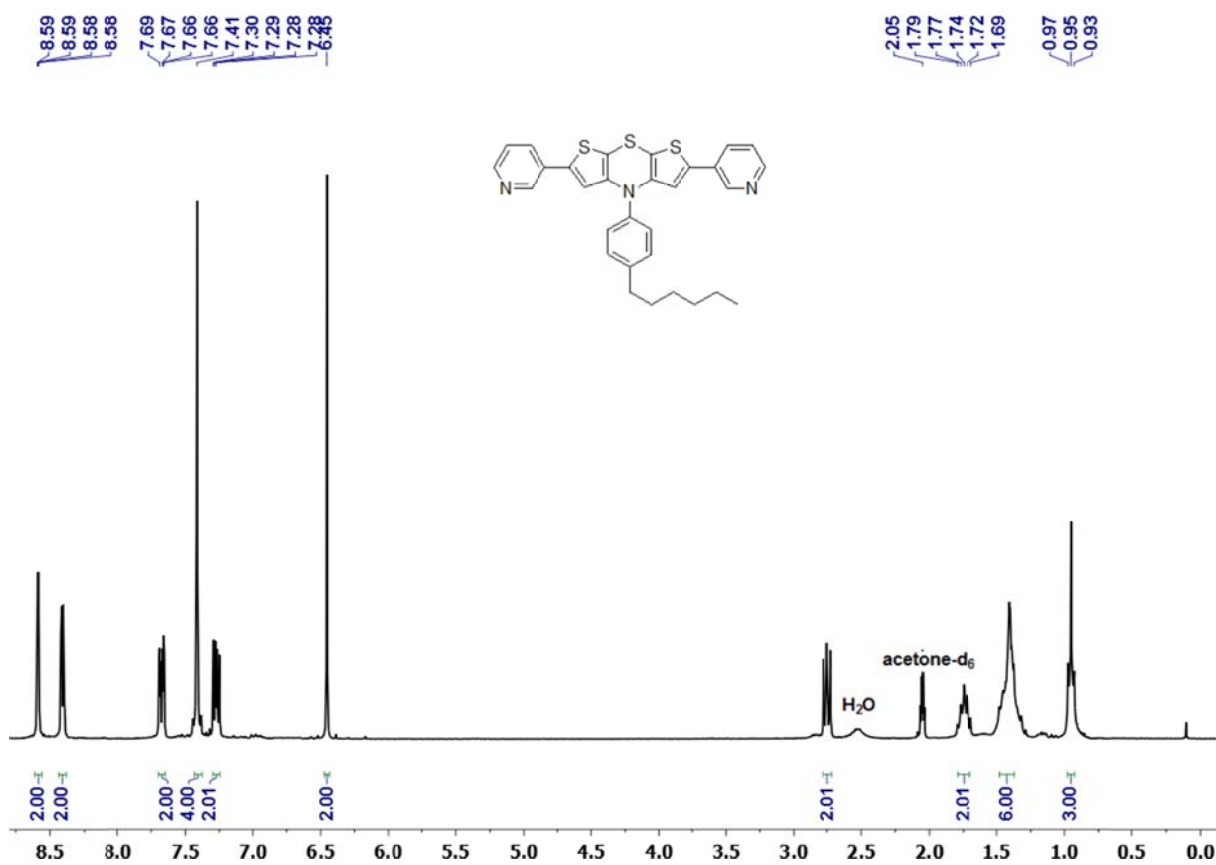

$^1\text{H}$ -NMR (300 MHz) of **3k** (20 mg) in acetone- $d_6$ / $\text{CS}_2$  1:1 at 298 K ( $\delta$  in ppm).

$^1\text{H}$ - and  $^{13}\text{C}$ -NMR spectra of 2,6-di(hetero)aryl dithienothiazines

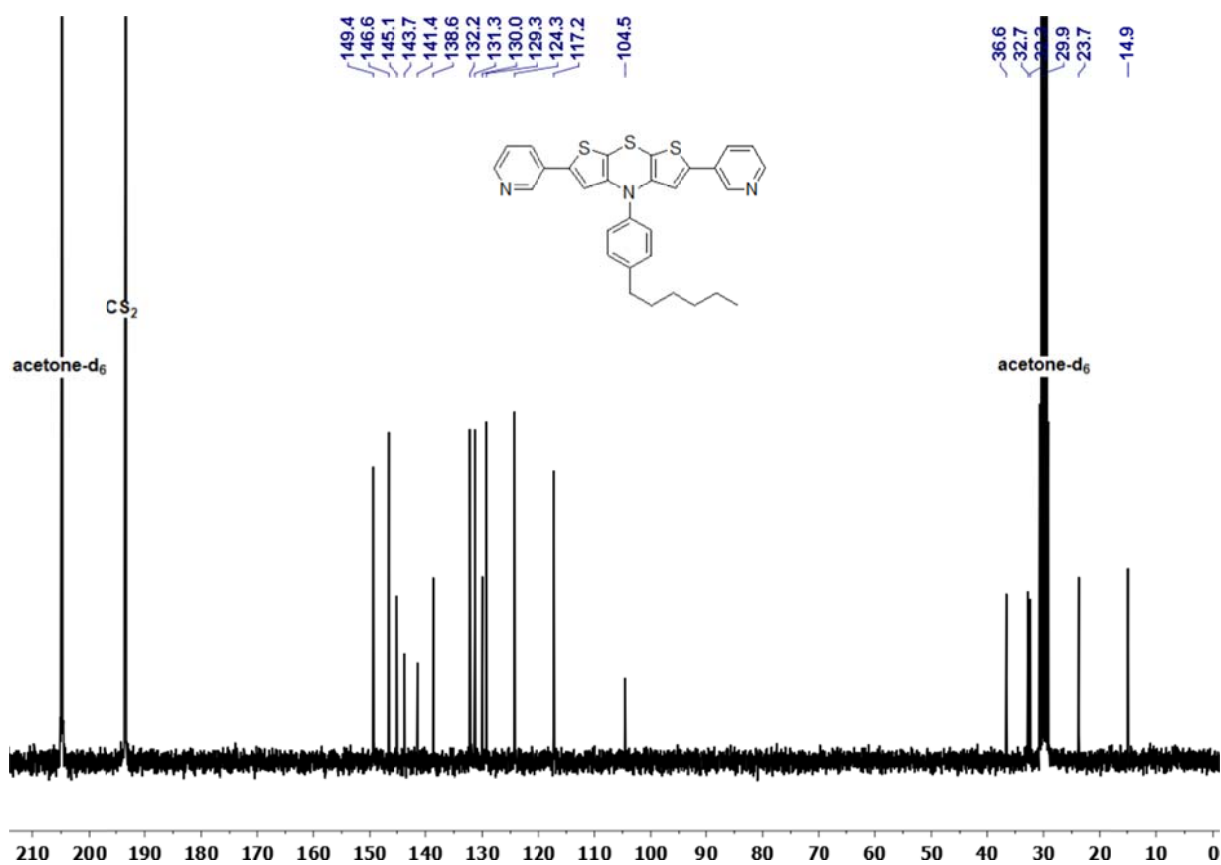

$^{13}\text{C}$ -NMR (75 MHz) of **3k** (20 mg) in acetone- $\text{d}_6$ / $\text{CS}_2$  1:1 at 298 K ( $\delta$  in ppm).

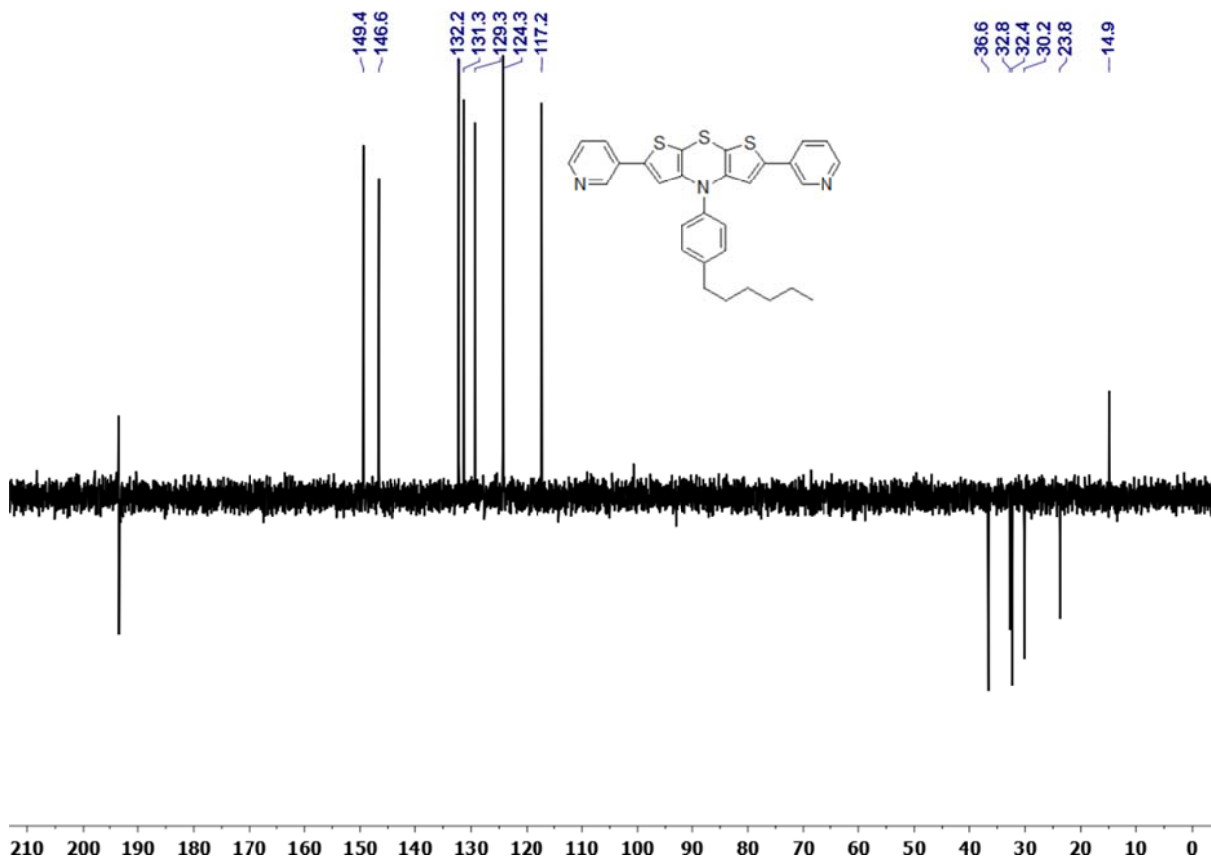

$^{13}\text{C}$ -DEPT 135-NMR (75 MHz) of **3k** (20 mg) in acetone- $\text{d}_6$ / $\text{CS}_2$  1:1 at 298 K ( $\delta$  in ppm).



**1.12 3,3'-(4-(4-Hexylphenyl)-4H-dithieno[2,3-b:3',2'-e][1,4]thiazine-2,6-diyl)bis(10-hexyl-10H-phenothiazine) (3I)**

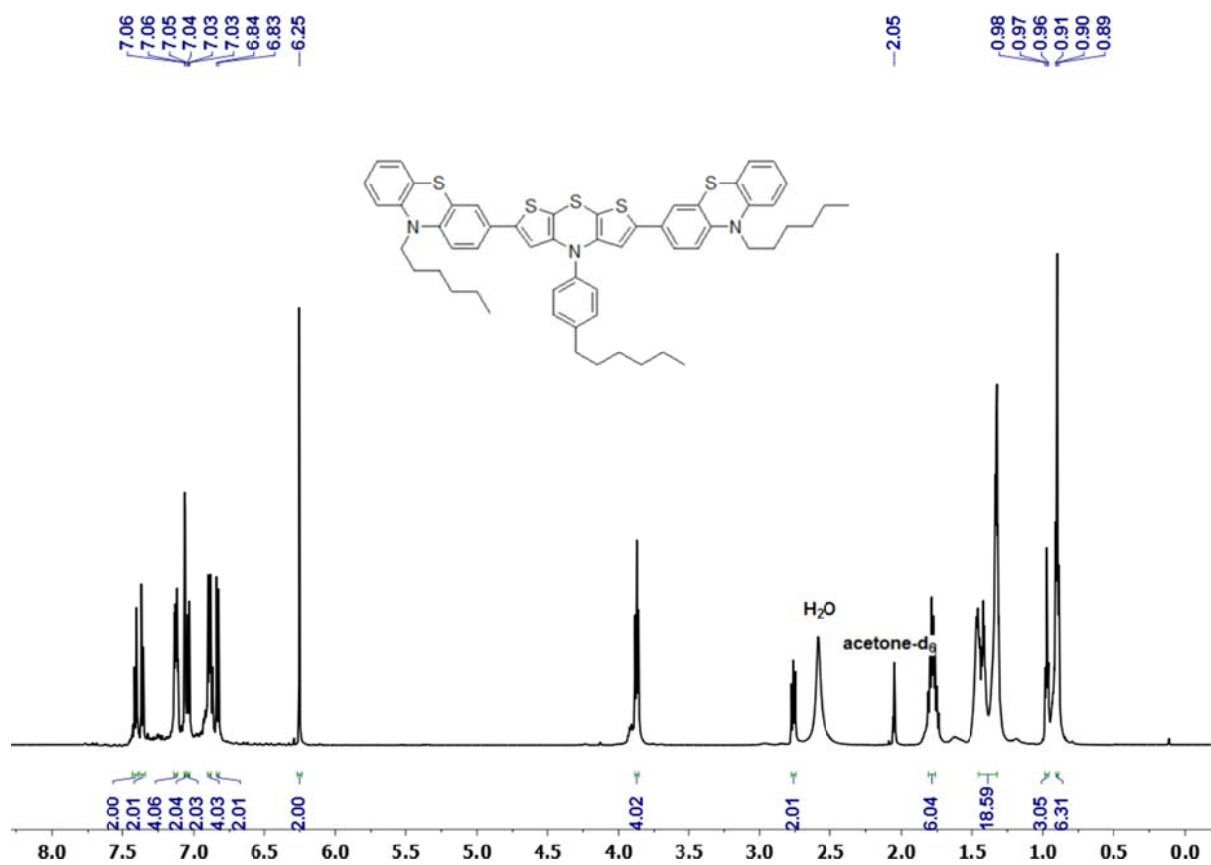

$^1\text{H}$ -NMR (600 MHz) of **3I** (20 mg) in acetone- $d_6$ /CS $_2$  1:2 at 298 K ( $\delta$  in ppm).

$^1\text{H}$ - and  $^{13}\text{C}$ -NMR spectra of 2,6-di(hetero)aryl dithienothiazines

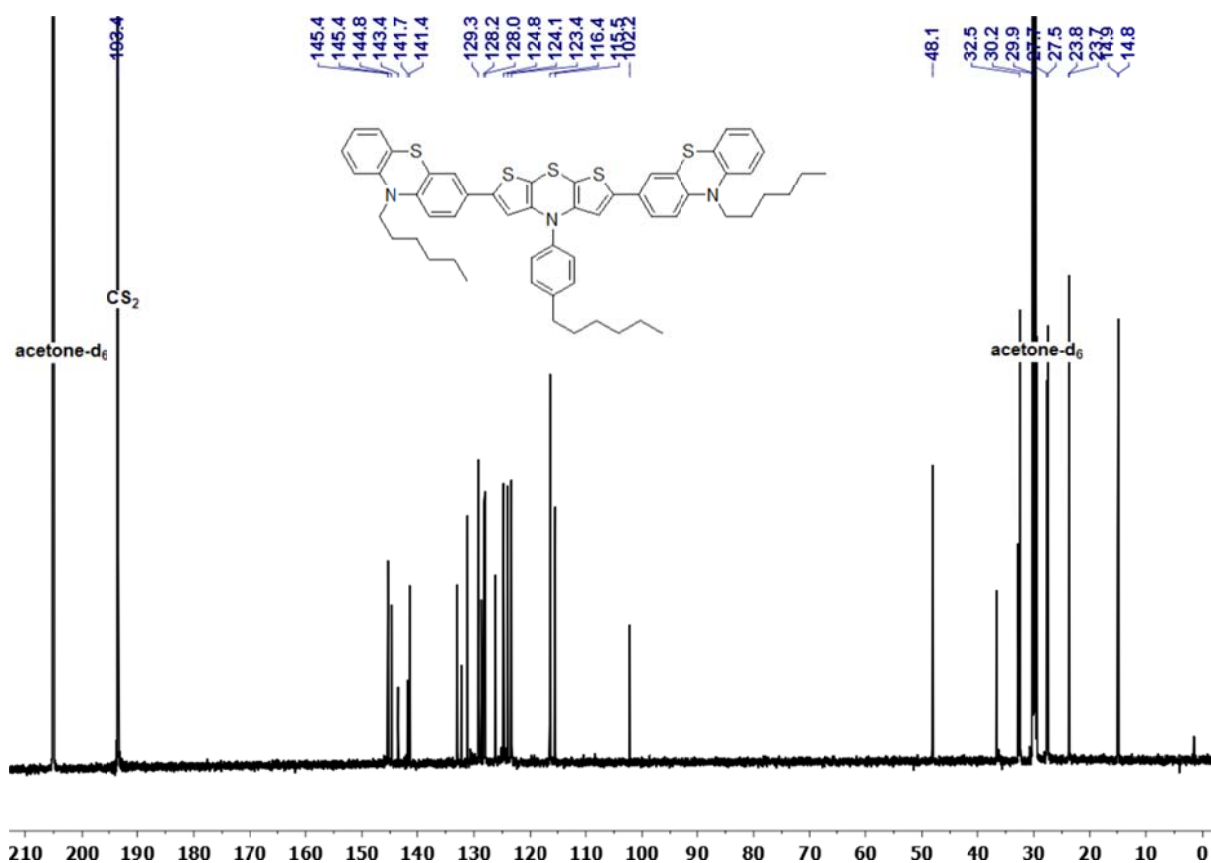

$^{13}\text{C}$ -NMR (150 MHz) of **3I** (20 mg) in acetone- $\text{d}_6$ / $\text{CS}_2$  1:2 at 298 K ( $\delta$  in ppm).

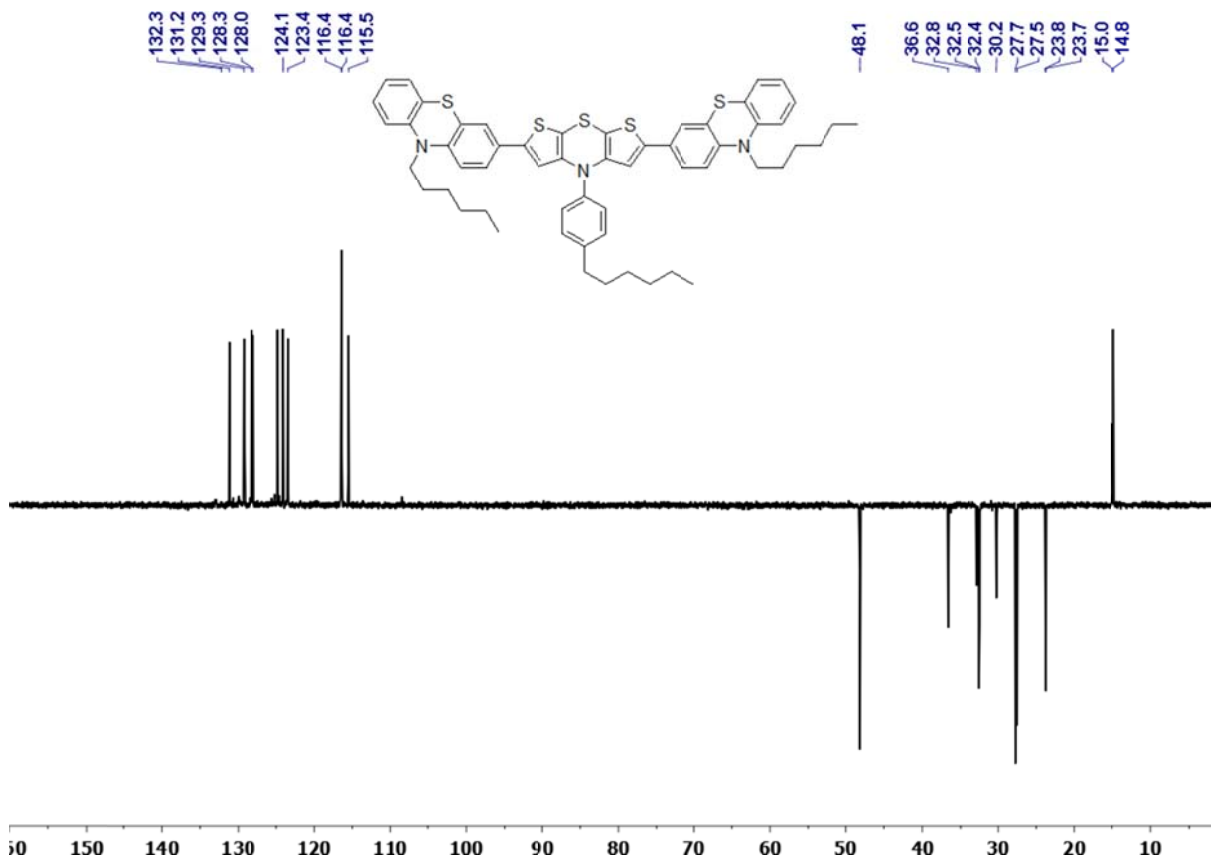

$^{13}\text{C}$ -DEPT 135-NMR (150 MHz) of **3I** (20 mg) in acetone- $\text{d}_6$ / $\text{CS}_2$  1:2 at 298 K ( $\delta$  in ppm).

## 2 <sup>1</sup>H- and <sup>13</sup>C-NMR spectra of 2-(hetero)aryl dithienothiazines 6a-6c

### 2.1 4-(4-Hexylphenyl)-2-(4-nitrophenyl)-4H-dithieno[2,3-b:3',2'-e][1,4]thiazine (6a)

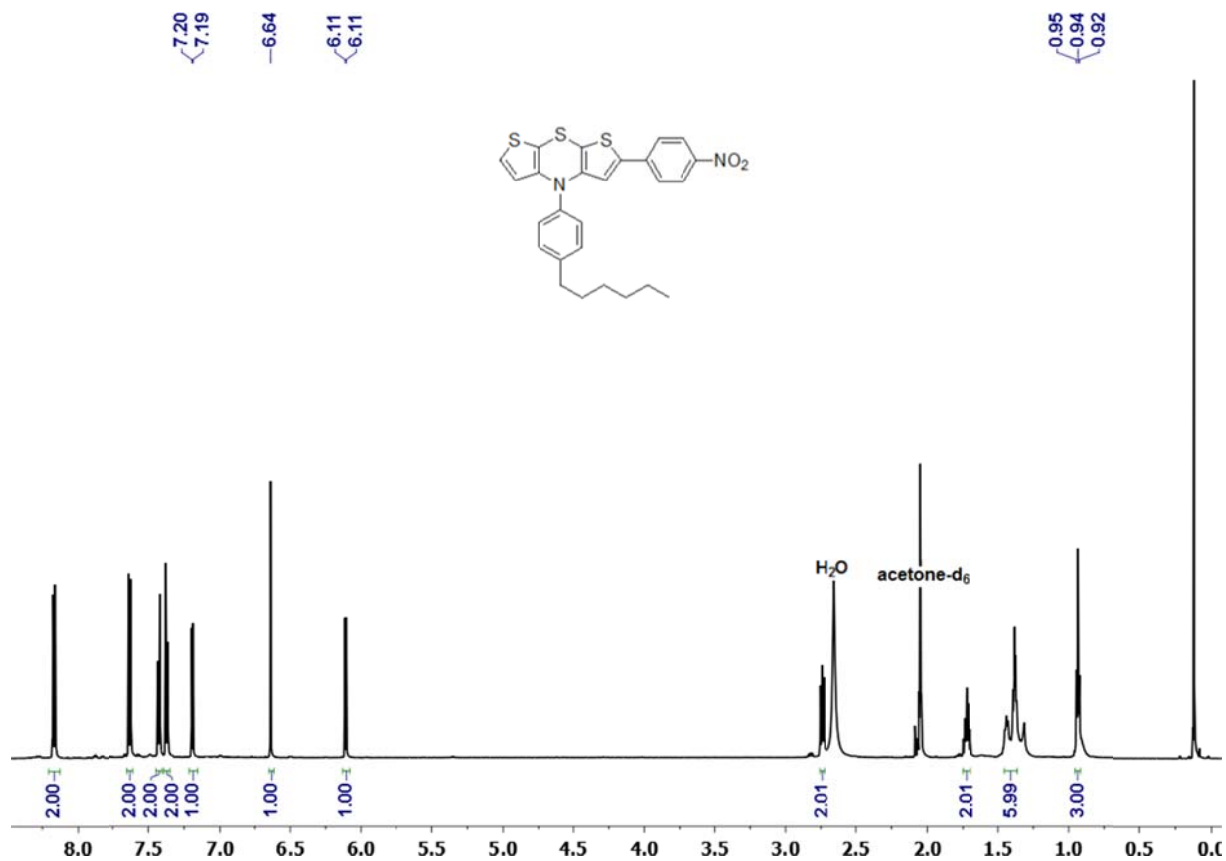

<sup>1</sup>H-NMR (600 MHz) of **6a** (20 mg) in acetone-d<sub>6</sub>/CS<sub>2</sub> 2:1 at 298 K (δ in ppm).

2 <sup>1</sup>H- and <sup>13</sup>C-NMR spectra of 2-(hetero)aryl dithienothiazines

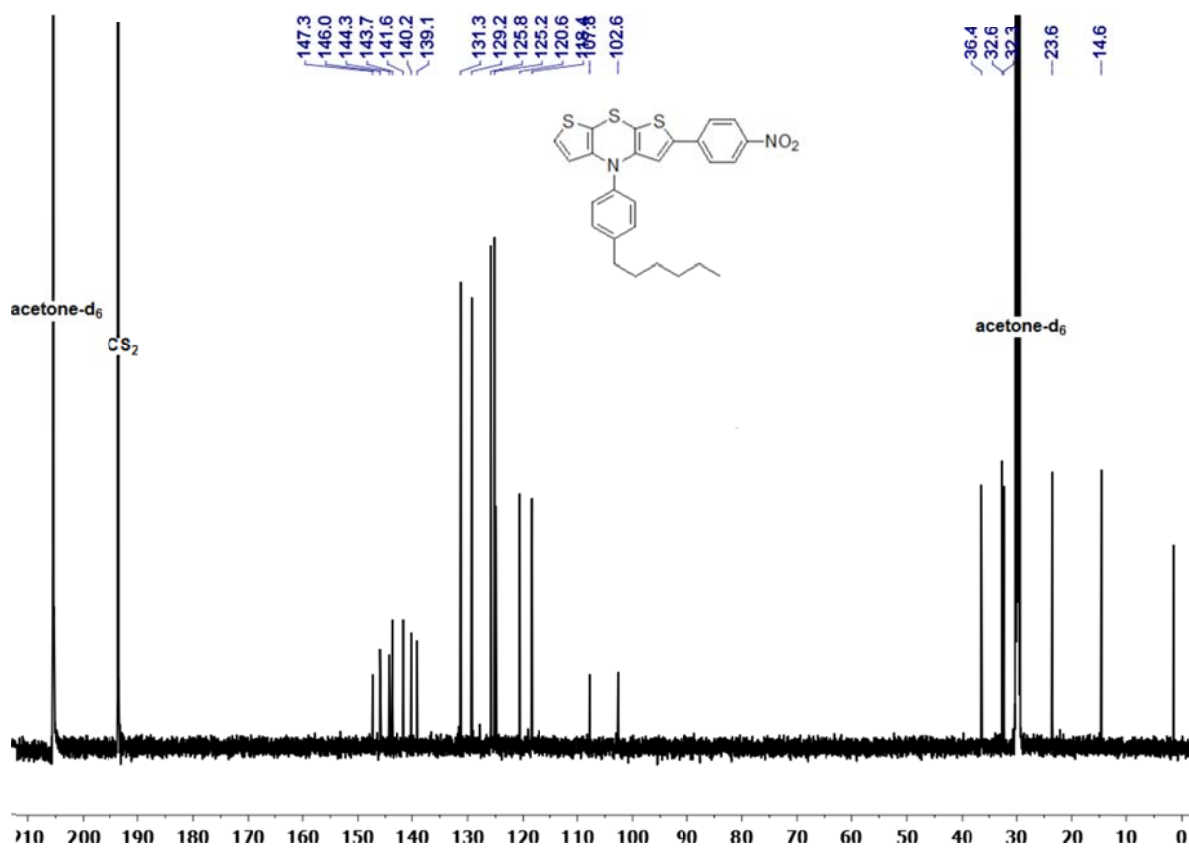

<sup>13</sup>C-NMR (150 MHz) of **6a** (20 mg) in acetone-d<sub>6</sub>/CS<sub>2</sub> 2:1 at 298 K (δ in ppm).

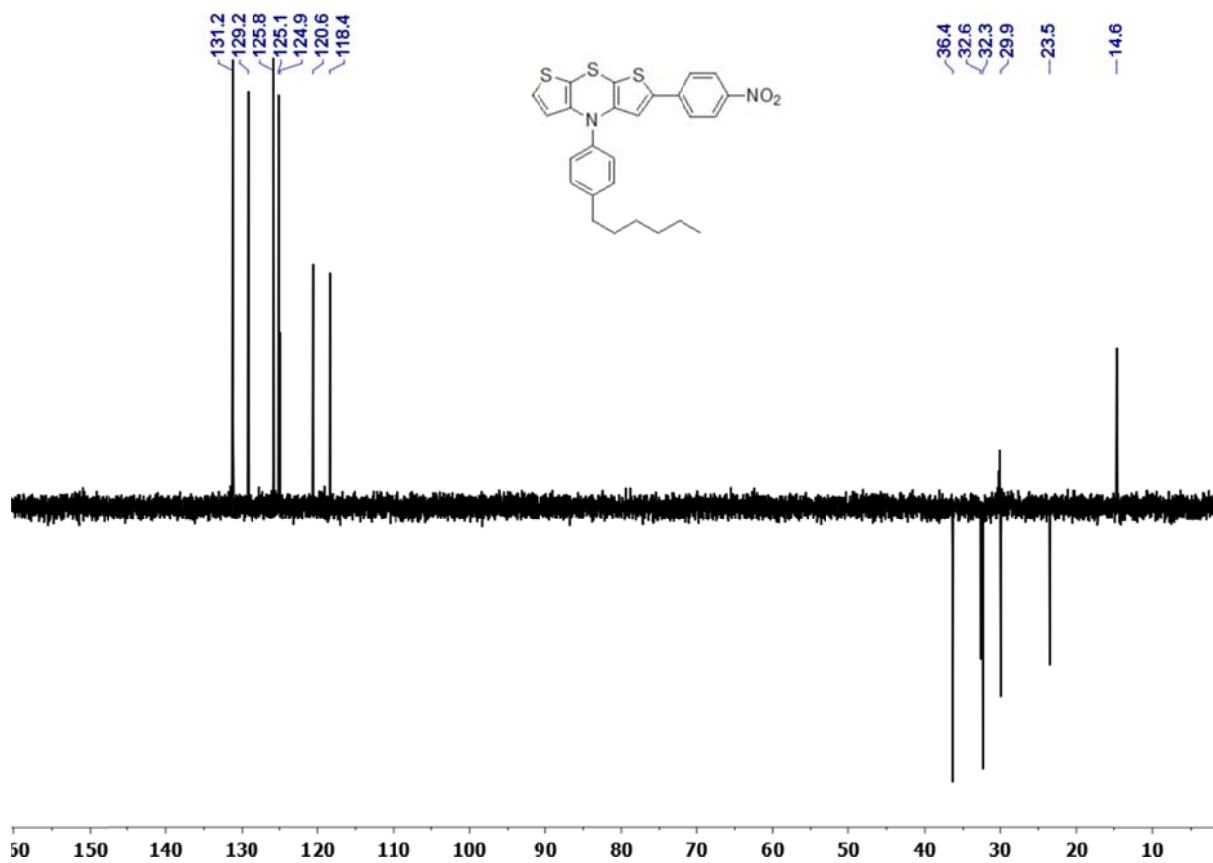

<sup>13</sup>C-DEPT 135-NMR (150 MHz) of **6a** (20 mg) in acetone-d<sub>6</sub>/CS<sub>2</sub> 2:1 at 298 K (δ in ppm).

2.2 4-(4-Hexylphenyl)-2-(thiophen-2-yl)-4H-dithieno[2,3-b:3',2'-e][1,4]thiazine (6b)

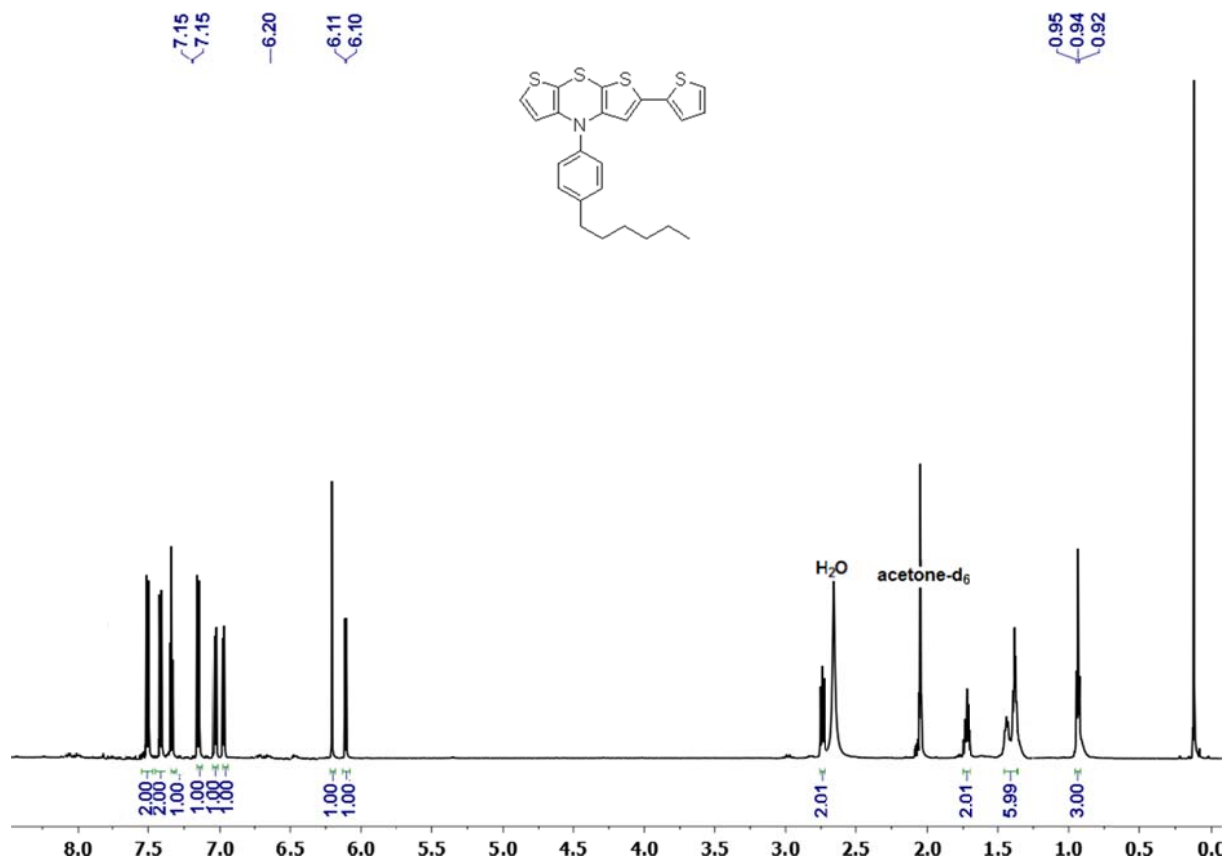

<sup>1</sup>H-NMR (600 MHz) of **6b** (20 mg) in acetone-d<sub>6</sub>/CS<sub>2</sub> 5:1 at 298 K (δ in ppm).

2 <sup>1</sup>H- and <sup>13</sup>C-NMR spectra of 2-(hetero)aryl dithienothiazines

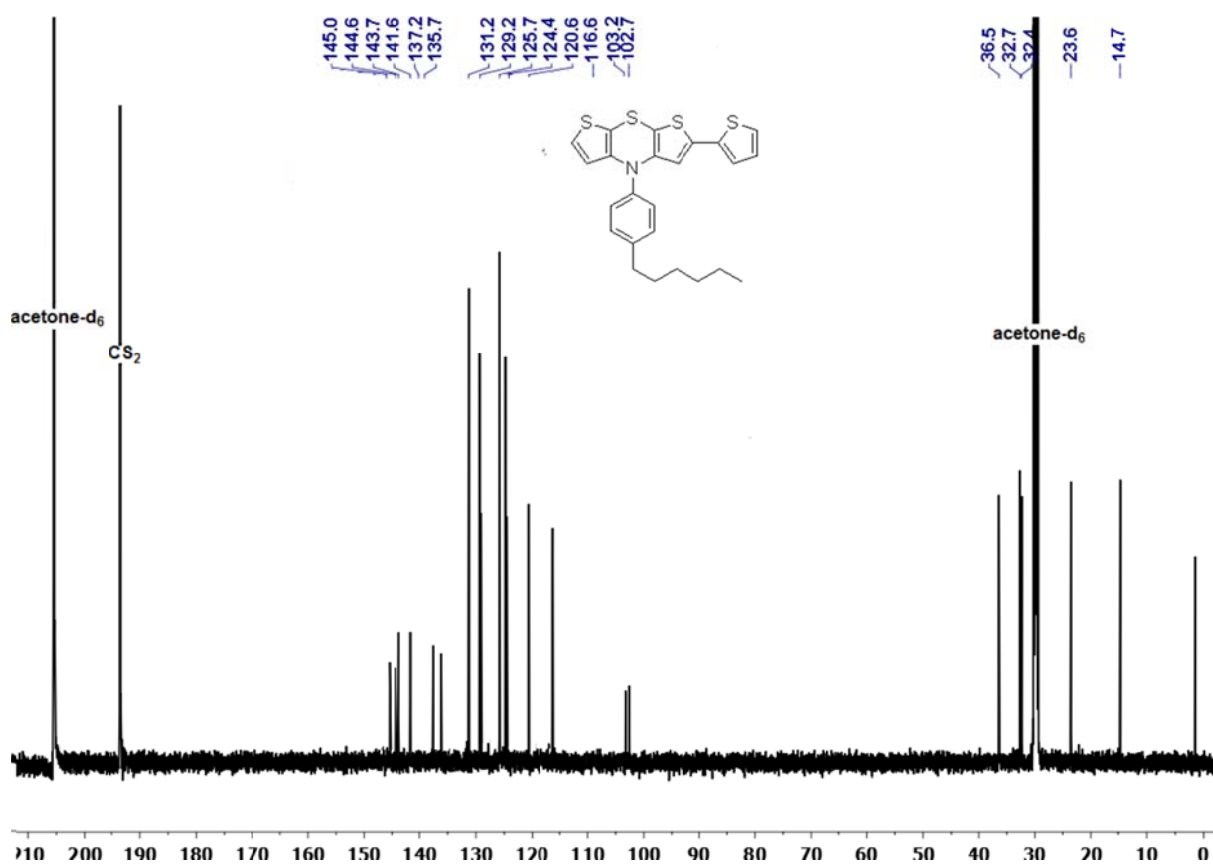

<sup>13</sup>C-NMR (150 MHz) of **6b** (20 mg) in acetone-d<sub>6</sub>/CS<sub>2</sub> 5:1 at 298 K (δ in ppm).

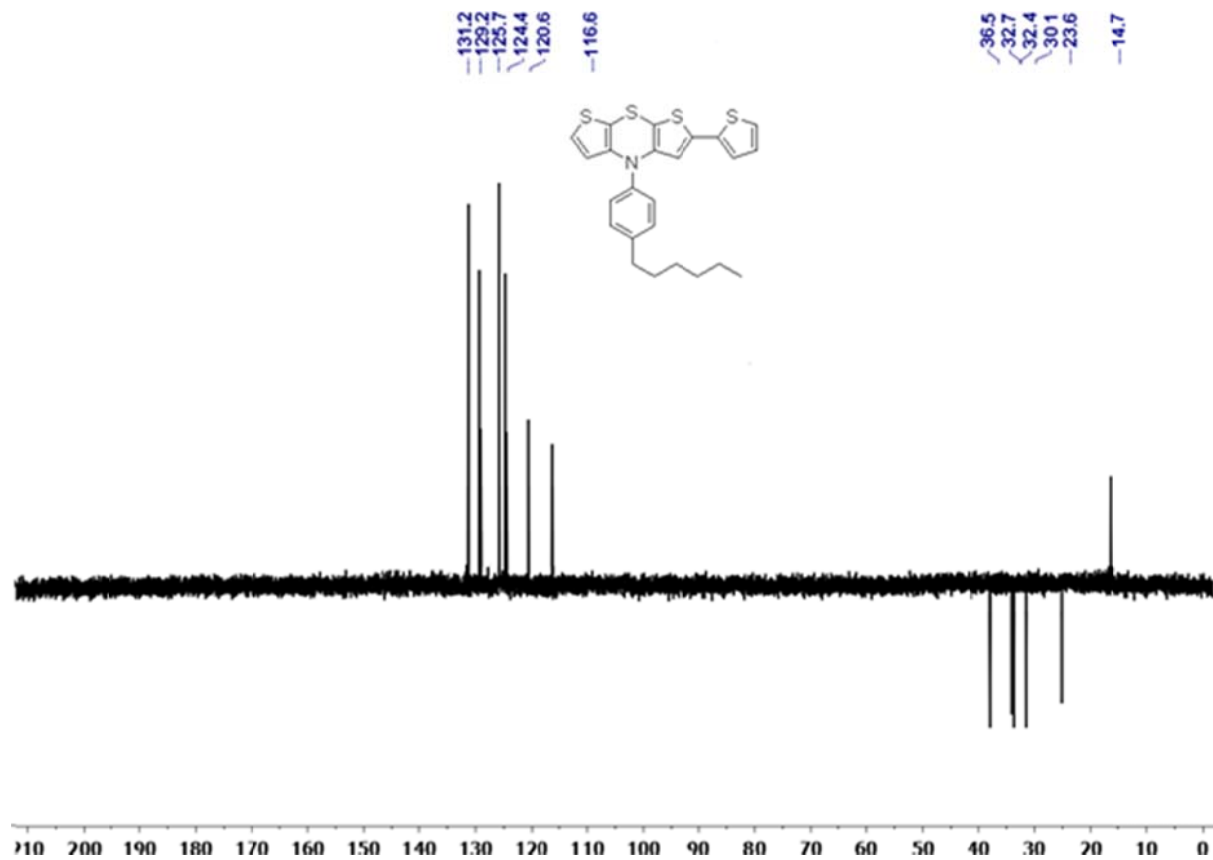

<sup>13</sup>C-DEPT 135-NMR (150 MHz) of **6b** (20 mg) in acetone-d<sub>6</sub>/CS<sub>2</sub> 5:1 at 298 K (δ in ppm).

### 2.3 4-(4-Hexylphenyl)-2-(pyridin-4-yl)-4H-dithieno[2,3-b:3',2'-e][1,4]thiazine (6c)

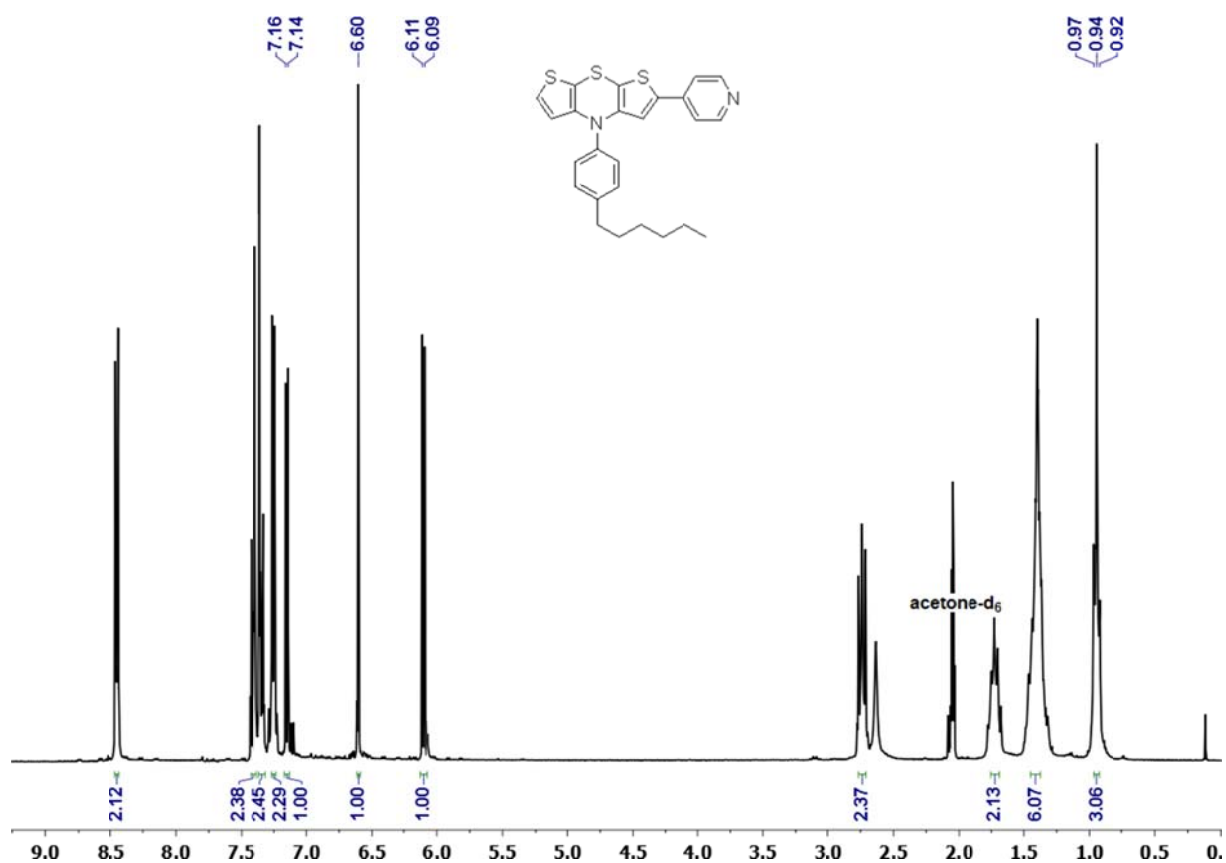

<sup>1</sup>H-NMR (300 MHz) of **6c** (20 mg) in acetone-d<sub>6</sub>/CS<sub>2</sub> 5:1 at 298 K (δ in ppm).

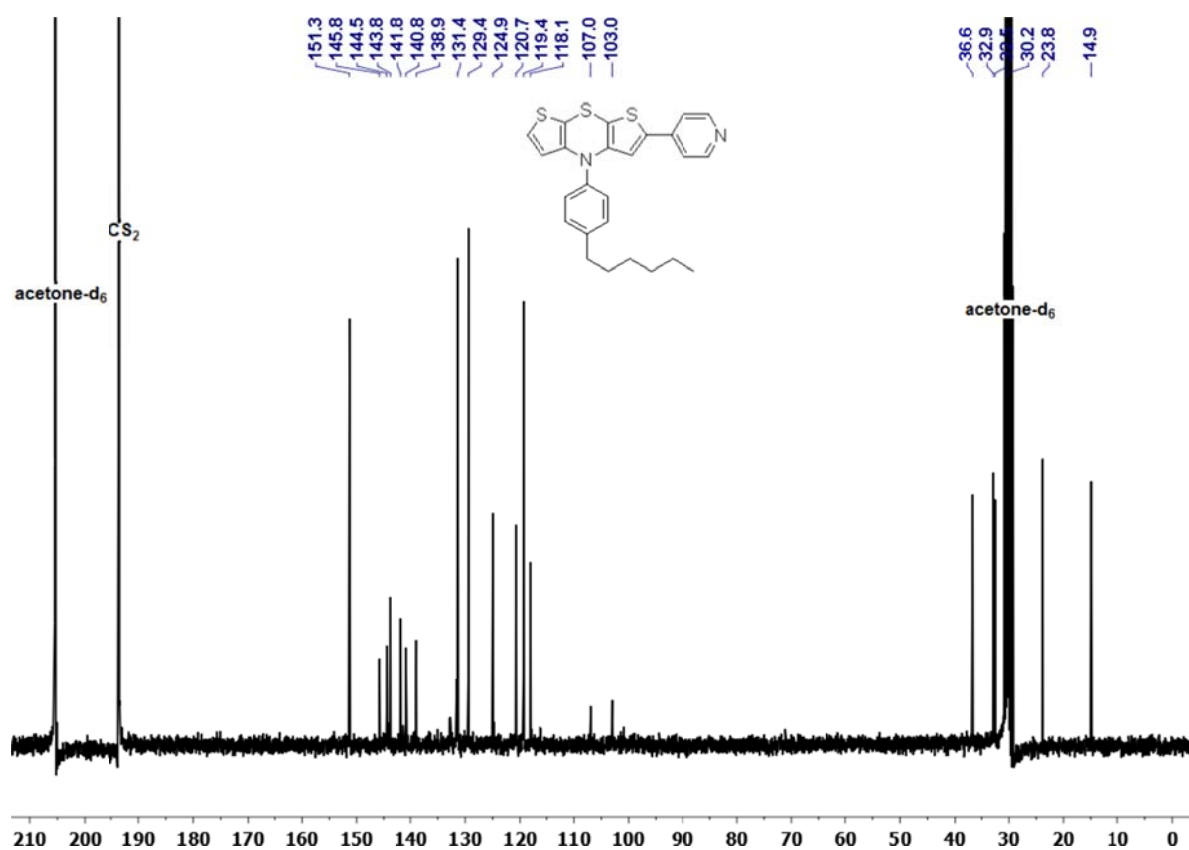

<sup>13</sup>C-NMR (75 MHz) of **6c** (20 mg) in acetone-d<sub>6</sub>/CS<sub>2</sub> 5:1 at 298 K (δ in ppm).

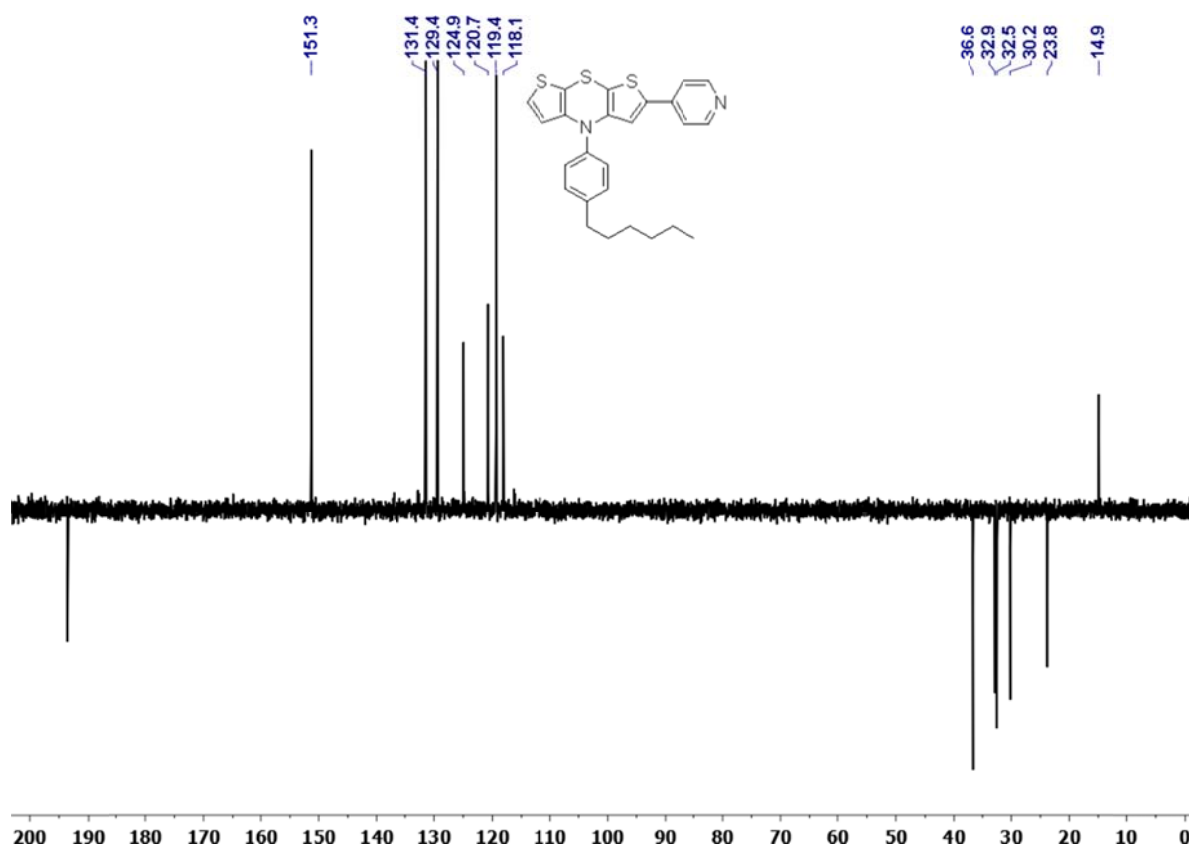

<sup>13</sup>C-DEPT 135-NMR (75 MHz) of **6c** (20 mg) in acetone-d<sub>6</sub>/CS<sub>2</sub> 5:1 at 298 K (δ in ppm).



### 3 UV and fluorescence spectra of 2,6-di(hetero)aryl dithienothiazines 3a-3l

#### 3.1 4-(4-Hexylphenyl)-2,6-bis(4-methoxyphenyl)-4H-dithieno[2,3-b:3',2'-e][1,4]thiazine (3a)

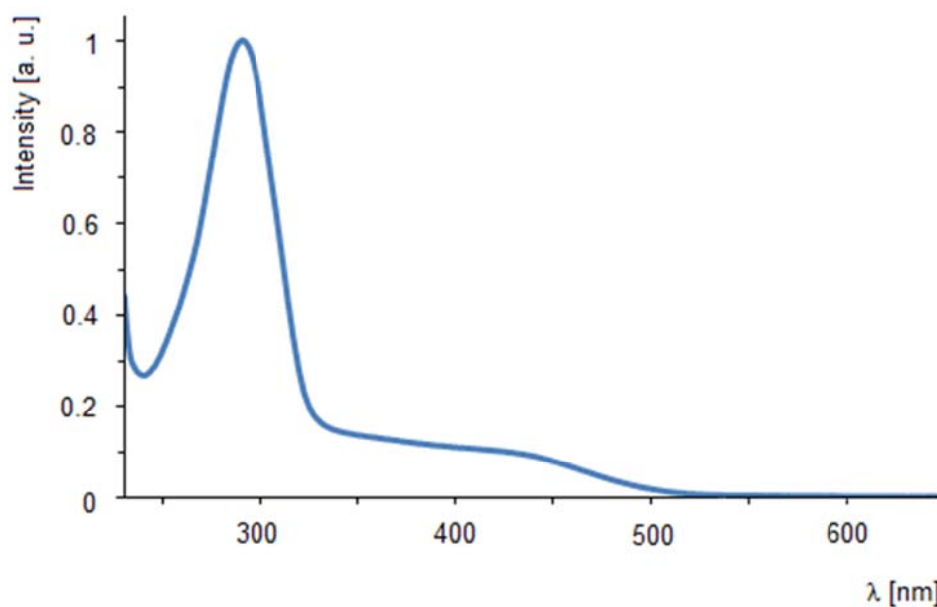

Normalized UV spectrum of **3a** in dichloromethane at 293 K.

#### 3.2 4-(4-Hexylphenyl)-2,6-di-p-tolyl-4H-dithieno[2,3-b:3',2'-e][1,4]thiazine (3b)

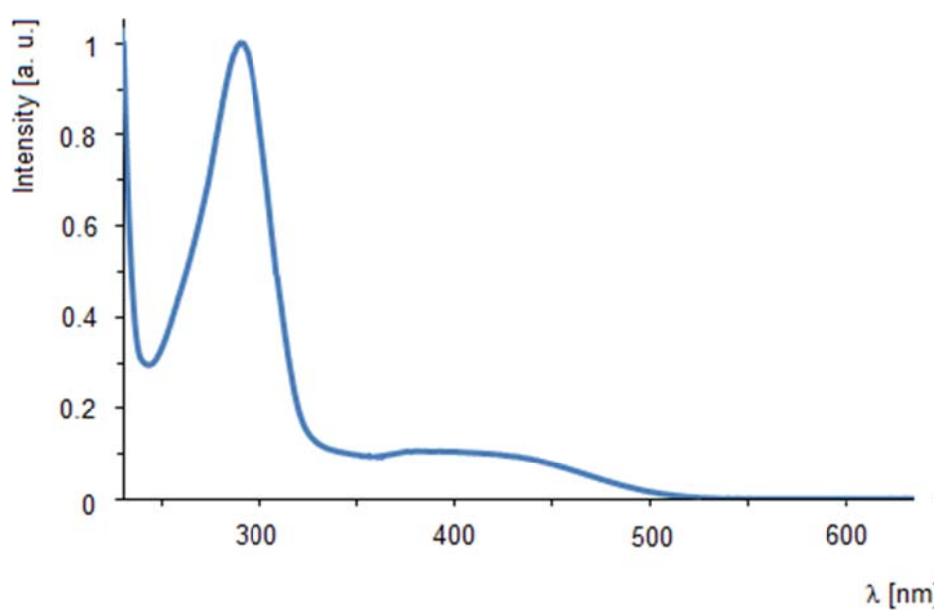

Normalized UV spectrum of **3b** in dichloromethane at 293 K.

### 3.3 4-(4-Hexylphenyl)-2,6-diphenyl-4H-dithieno[2,3-b:3',2'-e][1,4]thiazine (3c)

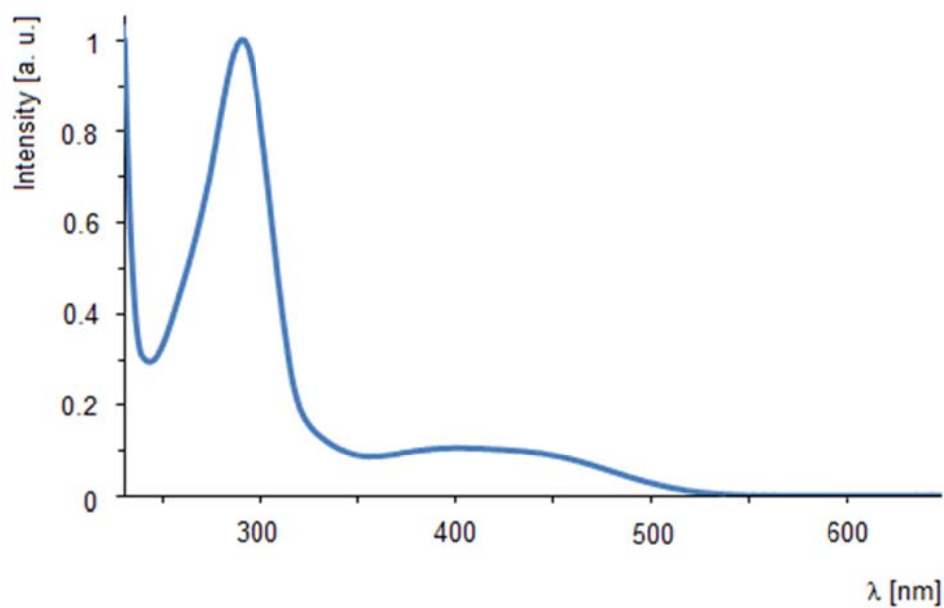

Normalized UV spectrum of **3c** in dichloromethane at 293 K.

### 3.4 2,6-Bis(4-chlorophenyl)-4-(4-hexylphenyl)-4H-dithieno [2,3-b:3',2'-e][1,4]thiazine (3d)

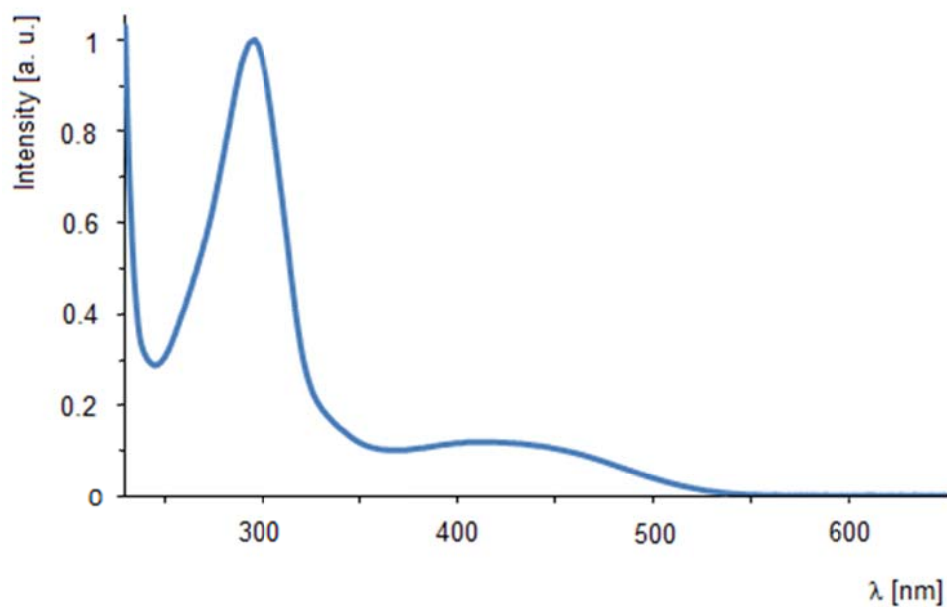

Normalized UV spectrum of **3d** in dichloromethane at 293 K.

**3.5 Dimethyl 4,4'-(4-(4-hexylphenyl)-4H-dithieno[2,3-b:3',2'-e][1,4]thiazine-2,6-diyl)dibenzoate (3e)**

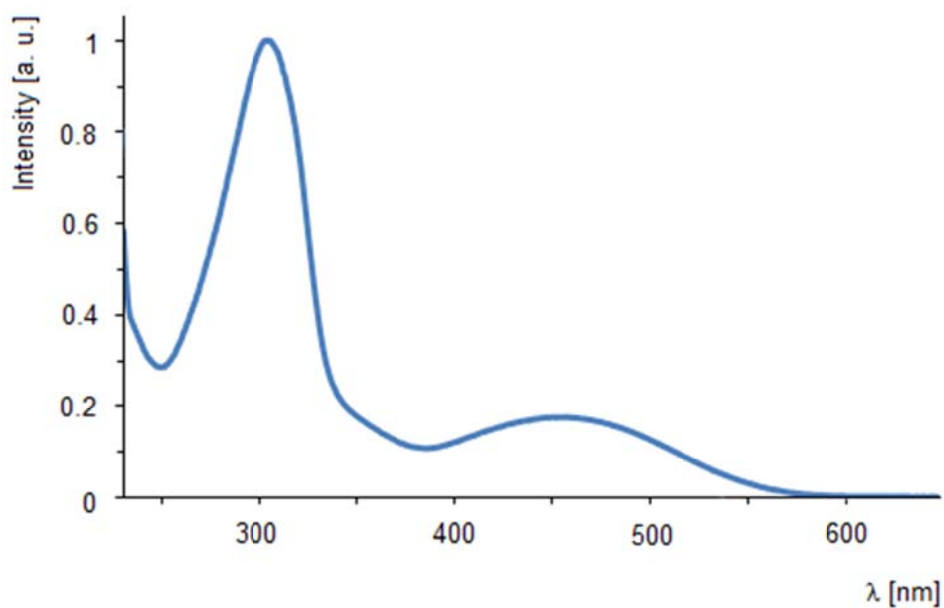

Normalized UV spectrum of **3e** in dichloromethane at 293 K.

**3.6 4-(4-Hexylphenyl)-2,6-bis(4-(trifluoromethyl)phenyl)-4H-dithieno[2,3-b:3',2'-e][1,4]thiazine (3f)**

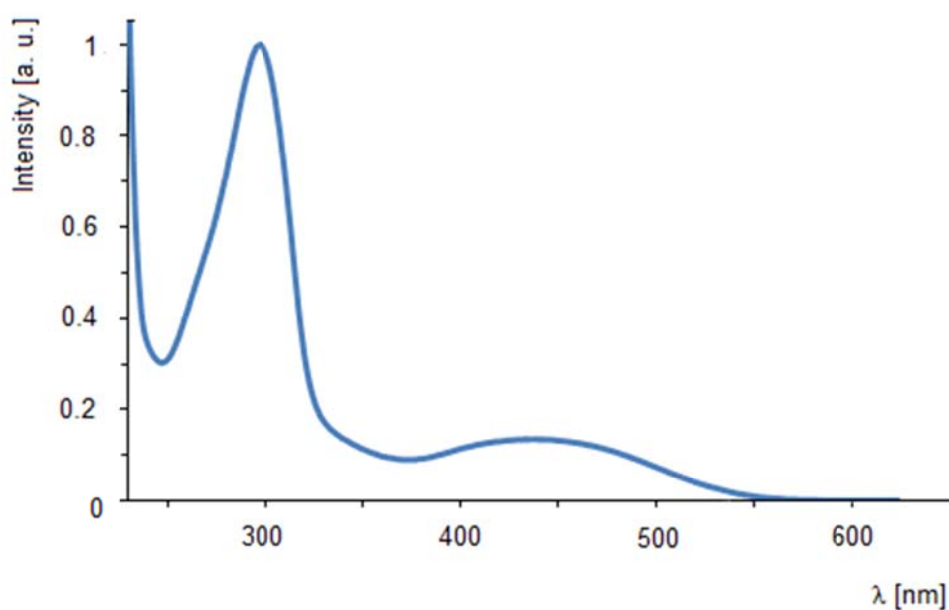

Normalized UV spectrum of **3f** in dichloromethane at 293 K.

**3.7 4,4'-(4-(4-Hexylphenyl)-4H-dithieno[2,3-b:3',2'-e][1,4]thiazine-2,6-diyl)dibenzonitrile (3g)**

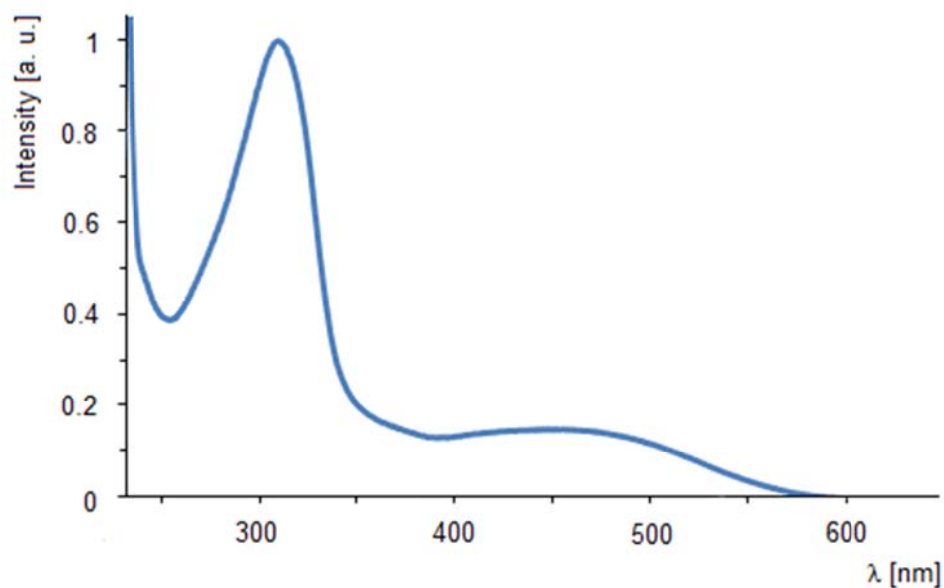

Normalized UV spectrum of **3g** in dichloromethane at 293 K.

**3.8 4-(4-Hexylphenyl)-2,6-bis(4-nitrophenyl)-4H-dithieno[2,3-b:3',2'-e][1,4]thiazine (3h)**

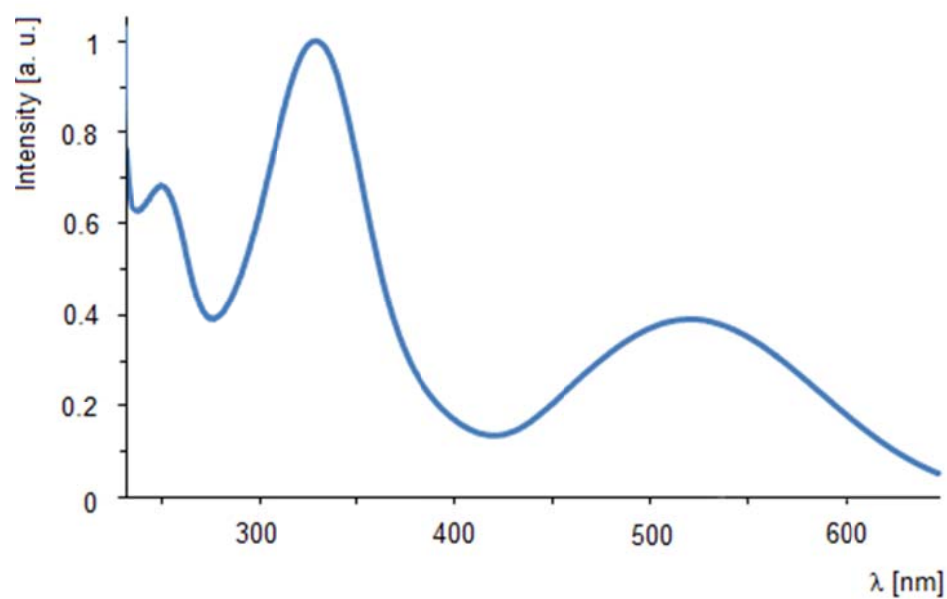

Normalized UV spectrum of **3h** in dichloromethane at 293 K.

**3.9 4-(4-Hexylphenyl)-2,6-bis(3-nitrophenyl)-4H-dithieno[2,3-b:3',2'-e][1,4]thiazine (3i)**

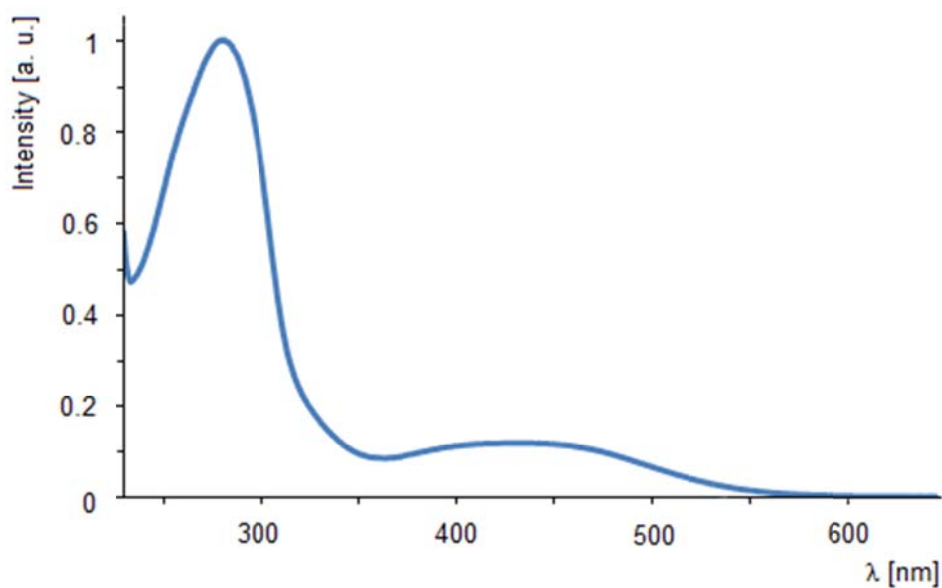

Normalized UV spectrum of **3h** in dichloromethane at 293 K.

**3.10 4-(4-Hexylphenyl)-2,6-bis(2-nitrophenyl)-4H-dithieno[2,3-b:3',2'-e][1,4]thiazine (3j)**

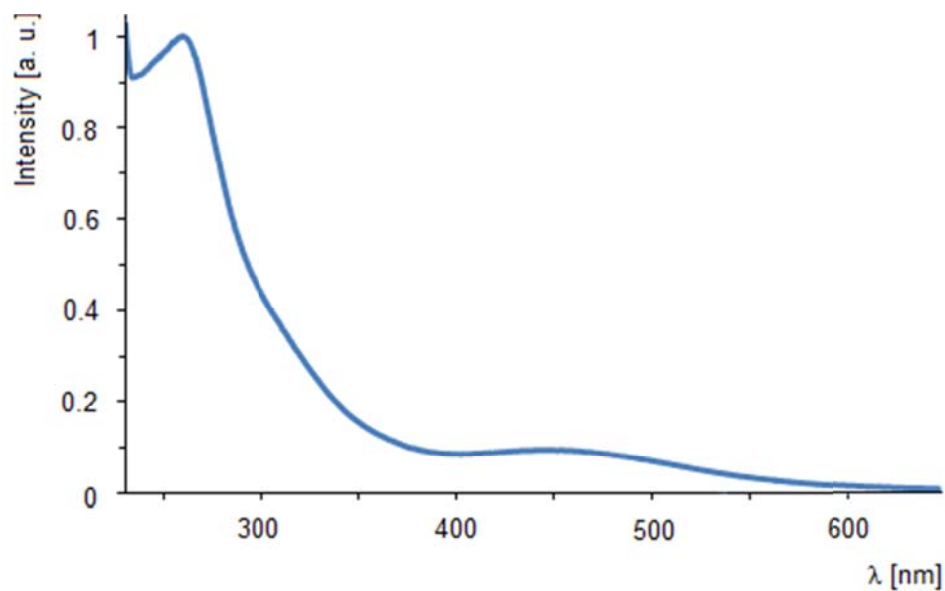

Normalized UV spectrum of **3i** in dichloromethane at 293 K.

### 3.11 4-(4-Hexylphenyl)-2,6-di(pyridin-3-yl)-4H-dithieno[2,3-b:3',2'-e][1,4]thiazine (3k)

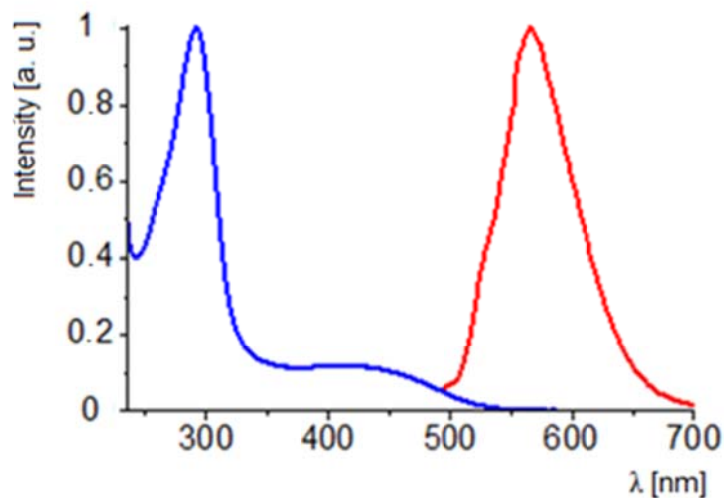

Normalized absorption (blue) and emission (red) spectra of **3k** ( $\lambda_{max,exc}$  = 380 nm) in dichloromethane at 293 K.

### 3.12 3,3'-(4-(4-Hexylphenyl)-4H-dithieno[2,3-b:3',2'-e][1,4]thiazine-2,6-diyl)bis(10-hexyl-10H-phenothiazine) (3l)

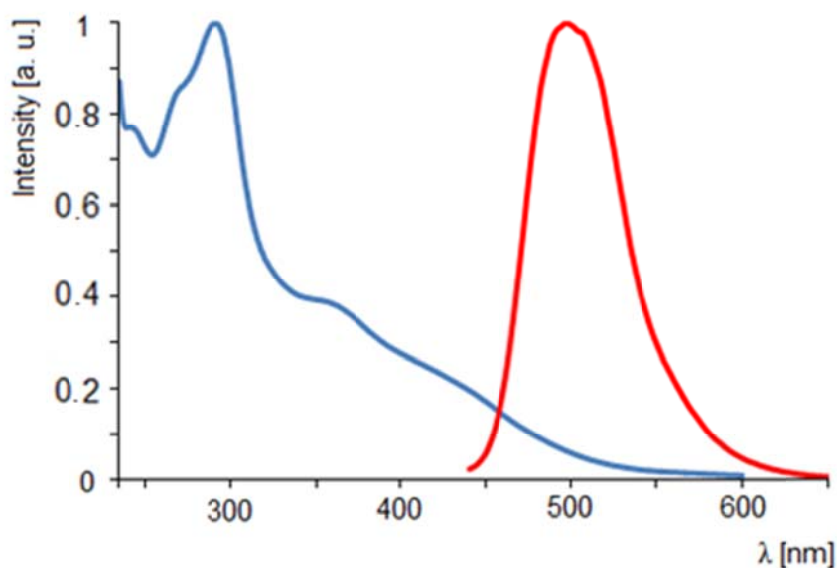

Normalized absorption (blue) and emission (red) spectra of **3l** ( $\lambda_{max,exc}$  = 420 nm) in dichloromethane at 293 K.

## 4 UV and fluorescence spectra of 2-(hetero)aryl dithienothiazines 6a-6c

### 4.1 4-(4-Hexylphenyl)-2-(4-nitrophenyl)-4H-dithieno[2,3-b:3',2'-e][1,4]thiazine (6a)

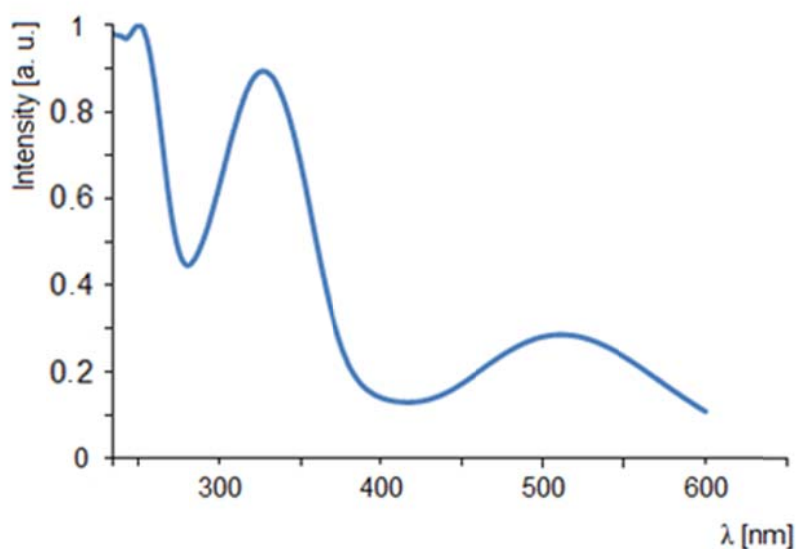

Normalized UV spectrum of **6a** in dichloromethane at 293 K.

### 4.2 4-(4-Hexylphenyl)-2-(thiophen-2-yl)-4H-dithieno[2,3-b:3',2'-e][1,4]thiazine (6b)

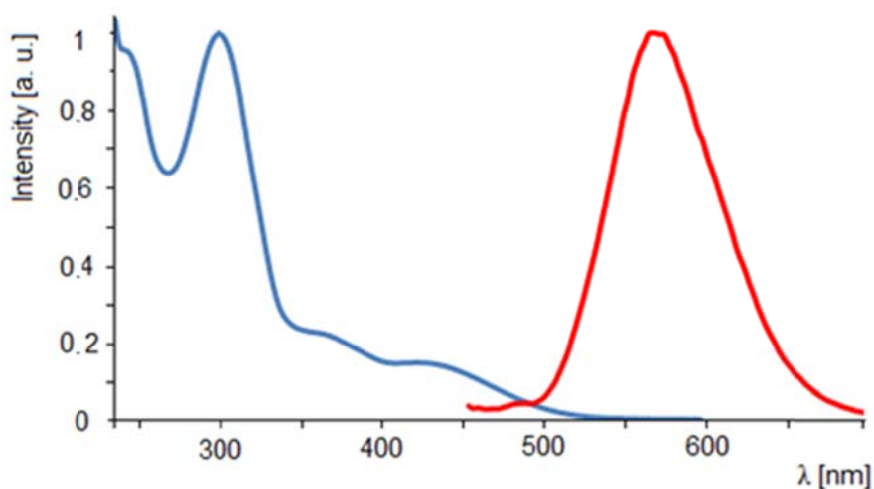

Normalized absorption (blue) and emission (red) spectra of **6b** ( $\lambda_{max,exc} = 425$  nm) in dichloromethane at 293 K.

### 4.3 4-(4-Hexylphenyl)-2-(pyridin-4-yl)-4H-dithieno[2,3-b:3',2'-e][1,4]thiazine (**6c**)

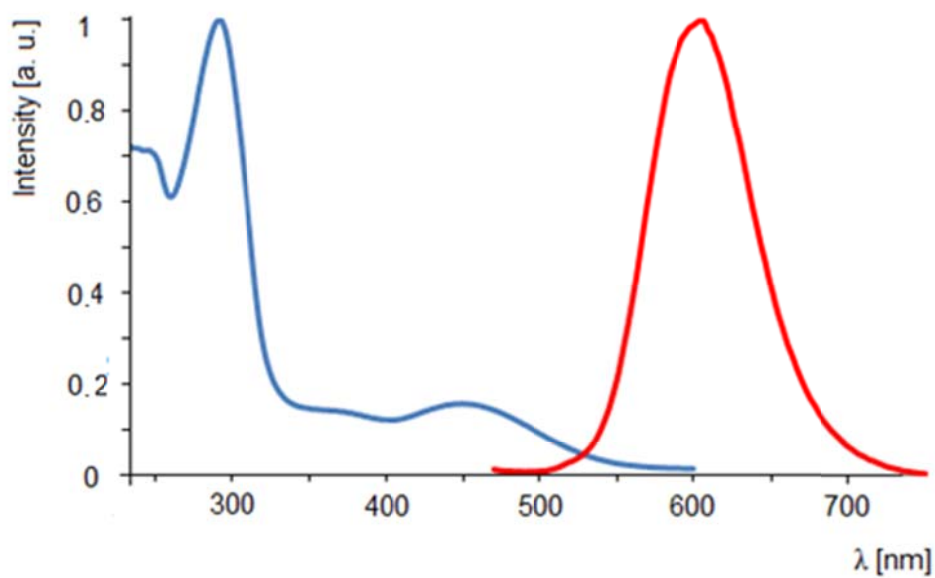

Normalized absorption (blue) and emission (red) spectra of **6c** ( $\lambda_{max,exc}$  = 450 nm) in dichloromethane at 293 K.



## 5 Cyclic voltammograms of 2,6-di(hetero)aryl dithienothiazines 3a-3l

### 5.1 4-(4-Hexylphenyl)-2,6-bis(4-methoxyphenyl)-4H-dithieno[2,3-b:3',2'-e][1,4]thiazine (3a)

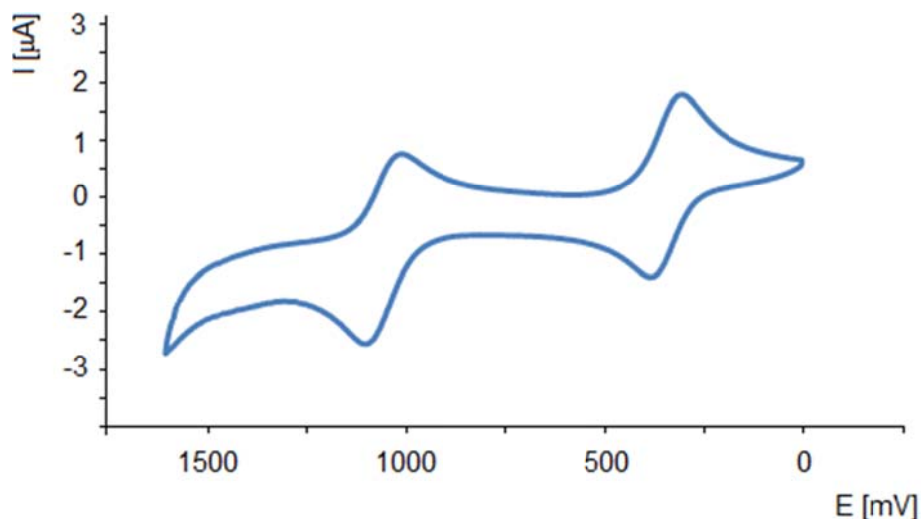

Cyclic voltammogram of **3a** recorded in dichloromethane,  $T = 293 \text{ K}$ ,  $\nu = 100 \text{ mV/s}$ ,  $0.1 \text{ M}$  electrolyte [ $n\text{Bu}_4\text{N}^+$ ][ $\text{PF}_6^-$ ], Pt working electrode, Pt counter electrode, Ag/AgCl reference electrode.

### 5.2 4-(4-Hexylphenyl)-2,6-di-p-tolyl-4H-dithieno[2,3-b:3',2'-e][1,4]thiazine (3b)

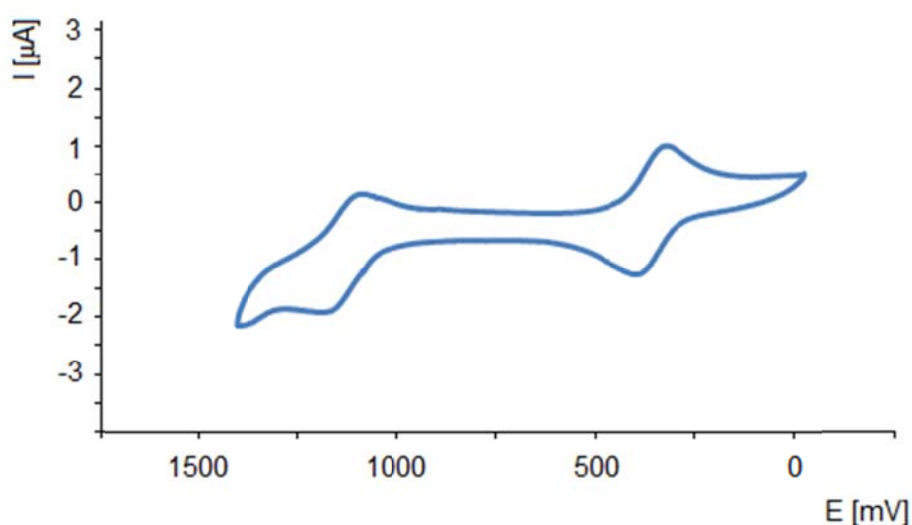

Cyclic voltammogram of **3b** recorded in dichloromethane,  $T = 293 \text{ K}$ ,  $\nu = 100 \text{ mV/s}$ ,  $0.1 \text{ M}$  electrolyte [ $n\text{Bu}_4\text{N}^+$ ][ $\text{PF}_6^-$ ], Pt working electrode, Pt counter electrode, Ag/AgCl reference electrode.

### 5.3 4-(4-Hexylphenyl)-2,6-diphenyl-4H-dithieno[2,3-b:3',2'-e][1,4]thiazine (3c)

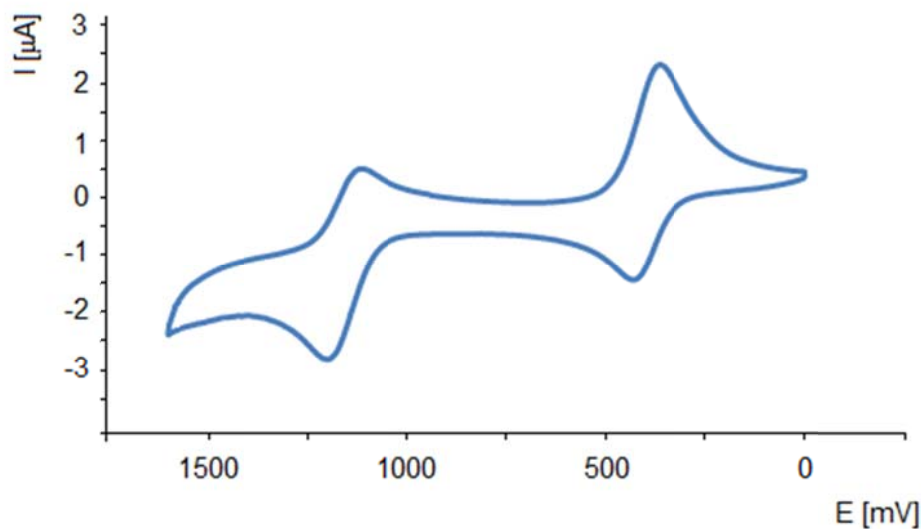

Cyclic voltammogram of **3c** recorded in dichloromethane,  $T = 293\text{ K}$ ,  $v = 100\text{ mV/s}$ ,  $0.1\text{ M}$  electrolyte  $[\text{nBu}_4\text{N}^+][\text{PF}_6^-]$ , Pt working electrode, Pt counter electrode, Ag/AgCl reference electrode.

### 5.4 2,6-Bis(4-chlorophenyl)-4-(4-hexylphenyl)-4H-dithieno [2,3-b:3',2'-e][1,4] thiazine (3d)

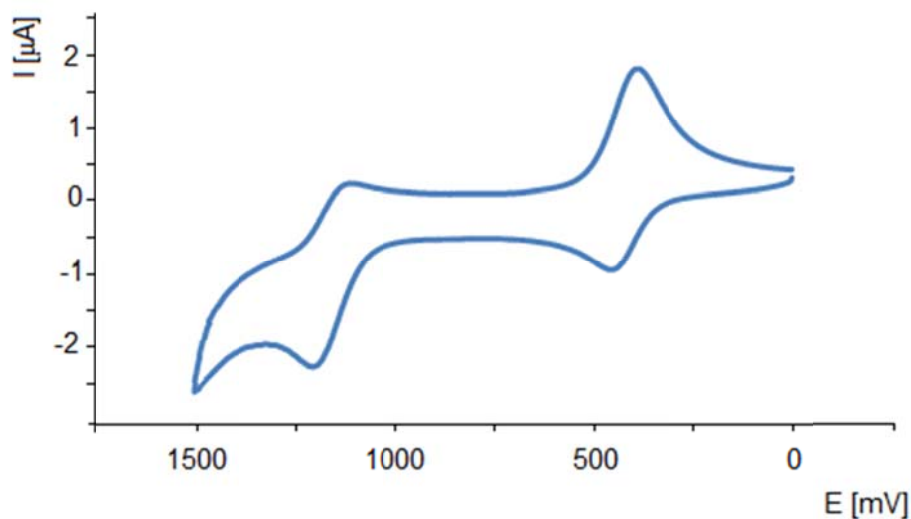

Cyclic voltammogram of **3d** recorded in dichloromethane,  $T = 293\text{ K}$ ,  $v = 100\text{ mV/s}$ ,  $0.1\text{ M}$  electrolyte  $[\text{nBu}_4\text{N}^+][\text{PF}_6^-]$ , Pt working electrode, Pt counter electrode, Ag/AgCl reference electrode.

**5.5 Dimethyl 4,4'-(4-(4-hexylphenyl)-4H-dithieno[2,3-b:3',2'-e][1,4]thiazine-2,6-diyl)dibenzoate (3e)**

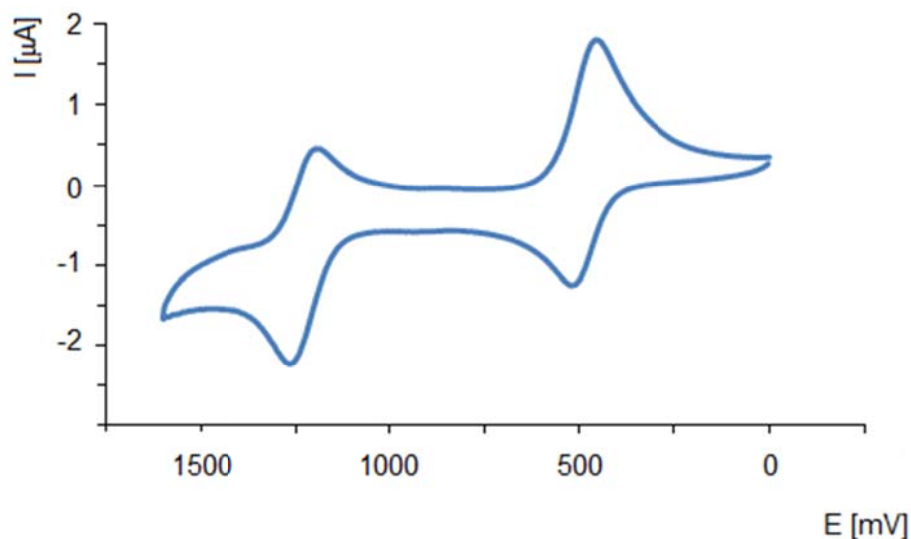

Cyclic voltammogram of **3e** recorded in dichloromethane,  $T = 293$  K,  $v = 100$  mV/s, 0.1 M electrolyte [ $n$ Bu $_4$ N $^+$ ][PF $_6^-$ ], Pt working electrode, Pt counter electrode, Ag/AgCl reference electrode.

**5.6 4-(4-Hexylphenyl)-2,6-bis(4-(trifluoromethyl)phenyl)-4H-dithieno[2,3-b:3',2'-e][1,4]thiazine (3f)**

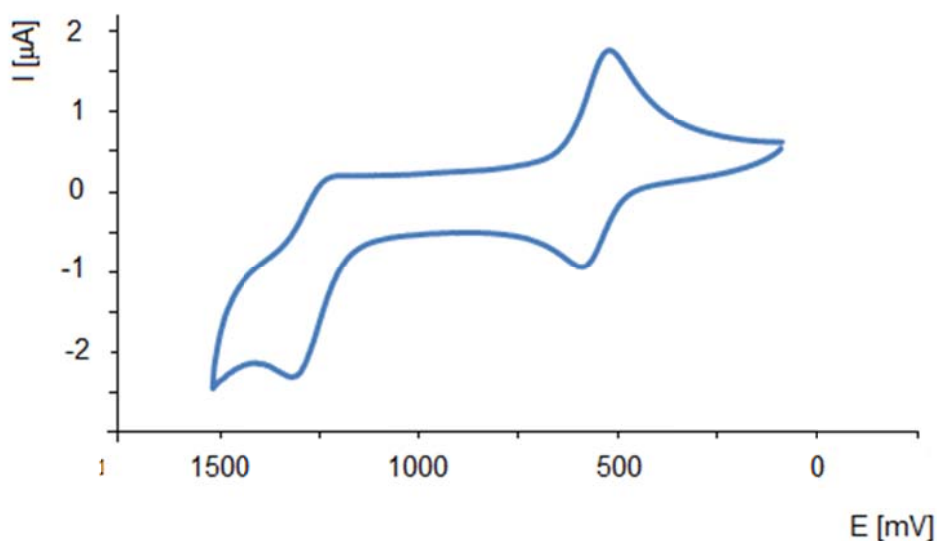

Cyclic voltammogram of **3f** recorded in dichloromethane,  $T = 293$  K,  $v = 100$  mV/s, 0.1 M electrolyte [ $n$ Bu $_4$ N $^+$ ][PF $_6^-$ ], Pt working electrode, Pt counter electrode, Ag/AgCl reference electrode.

**5.7 4,4'-(4-(4-Hexylphenyl)-4H-dithieno[2,3-b:3',2'-e][1,4]thiazine-2,6-diyl)dibenzonitrile (3g)**

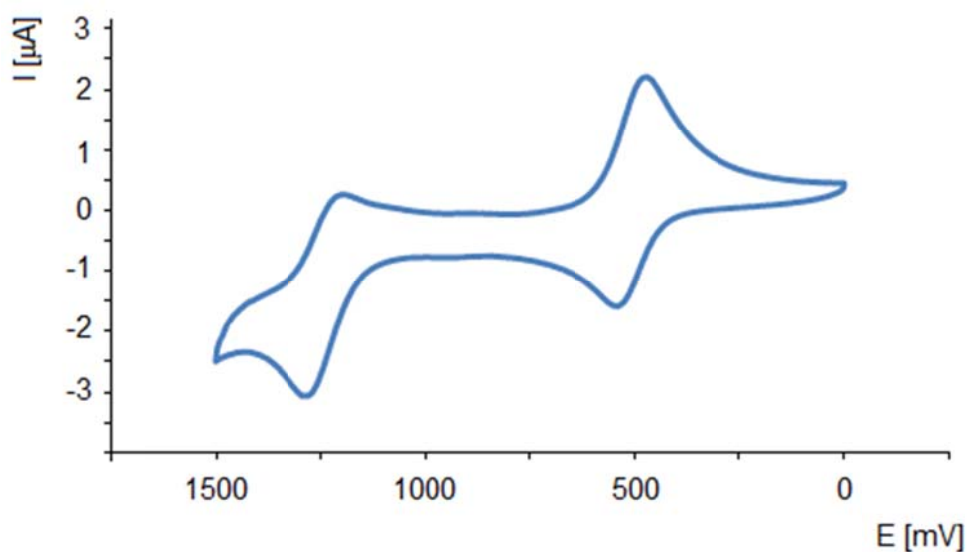

Cyclic voltammogram of **3g** recorded in dichloromethane,  $T = 293\text{ K}$ ,  $v = 100\text{ mV/s}$ ,  $0.1\text{ M}$  electrolyte  $[\text{nBu}_4\text{N}^+][\text{PF}_6^-]$ , Pt working electrode, Pt counter electrode, Ag/AgCl reference electrode.

**5.8 4-(4-Hexylphenyl)-2,6-bis(4-nitrophenyl)-4H-dithieno[2,3-b:3',2'-e][1,4]thiazine (3h)**

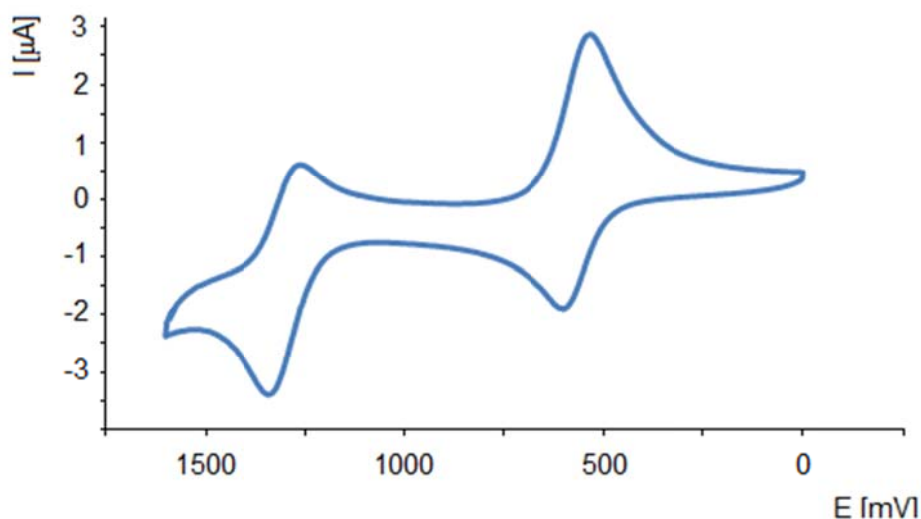

Cyclic voltammogram of **3h** recorded in dichloromethane,  $T = 293\text{ K}$ ,  $v = 100\text{ mV/s}$ ,  $0.1\text{ M}$  electrolyte  $[\text{nBu}_4\text{N}^+][\text{PF}_6^-]$ , Pt working electrode, Pt counter electrode, Ag/AgCl reference electrode.

**5.9 4-(4-Hexylphenyl)-2,6-bis(3-nitrophenyl)-4H-dithieno[2,3-b:3',2'-e][1,4]thiazine (3i)**

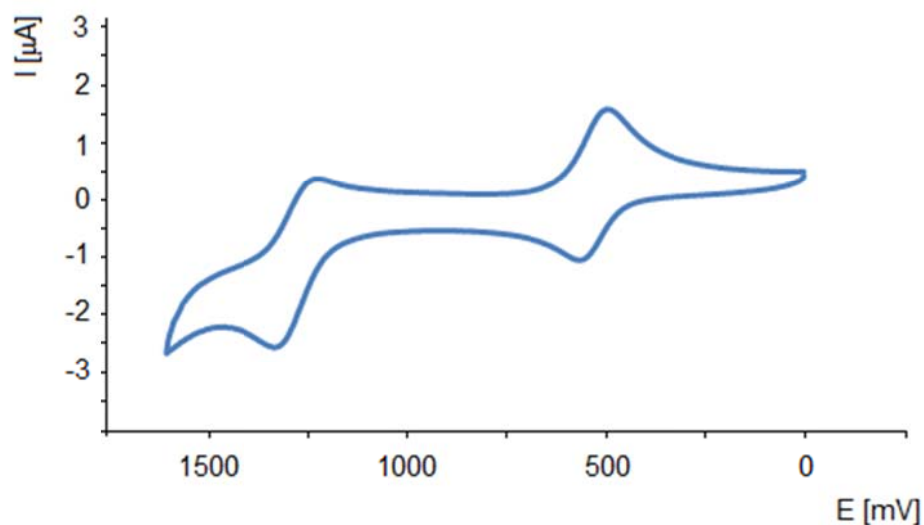

Cyclic voltammogram of **3i** recorded in dichloromethane,  $T = 293\text{ K}$ ,  $\nu = 100\text{ mV/s}$ ,  $0.1\text{ M}$  electrolyte  $[\text{nBu}_4\text{N}^+][\text{PF}_6^-]$ , Pt working electrode, Pt counter electrode, Ag/AgCl reference electrode.

**5.10 4-(4-Hexylphenyl)-2,6-bis(2-nitrophenyl)-4H-dithieno[2,3-b:3',2'-e][1,4]thiazine (3j)**

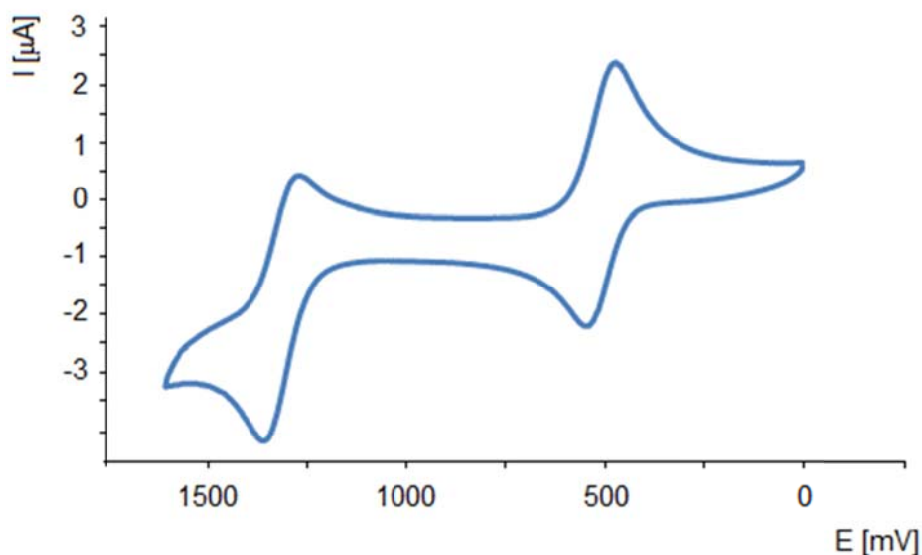

Cyclic voltammogram of **3j** recorded in dichloromethane,  $T = 293\text{ K}$ ,  $\nu = 100\text{ mV/s}$ ,  $0.1\text{ M}$  electrolyte  $[\text{nBu}_4\text{N}^+][\text{PF}_6^-]$ , Pt working electrode, Pt counter electrode, Ag/AgCl reference electrode.

**5.11 4-(4-Hexylphenyl)-2,6-di(pyridin-3-yl)-4H-dithieno[2,3-b:3',2'-e][1,4]thiazine (3k)**

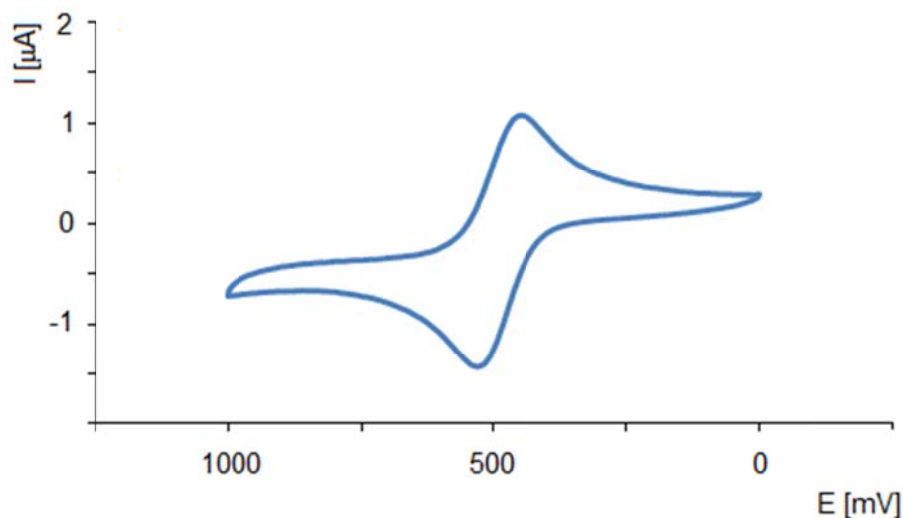

Cyclic voltammogram of **3k** recorded in dichloromethane,  $T = 293\text{ K}$ ,  $\nu = 100\text{ mV/s}$ ,  $0.1\text{ M}$  electrolyte [ $n\text{Bu}_4\text{N}^+$ ][ $\text{PF}_6^-$ ], Pt working electrode, Pt counter electrode, Ag/AgCl reference electrode.

**5.12 3,3'-(4-(4-Hexylphenyl)-4H-dithieno[2,3-b:3',2'-e][1,4]thiazine-2,6-diyl)bis(10-hexyl-10H-phenothiazine) (3l)**

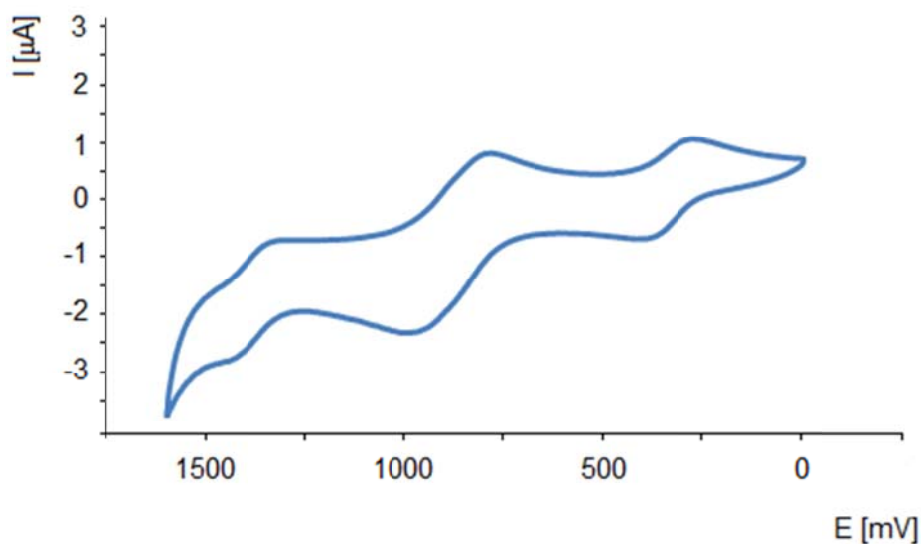

Cyclic voltammogram of **3l** recorded in dichloromethane,  $T = 293\text{ K}$ ,  $\nu = 100\text{ mV/s}$ ,  $0.1\text{ M}$  electrolyte [ $n\text{Bu}_4\text{N}^+$ ][ $\text{PF}_6^-$ ], Pt working electrode, Pt counter electrode, Ag/AgCl reference electrode.

## 6 Cyclic voltammograms of 2-(hetero)aryl dithienothiazines 6a-6c

### 6.1 4-(4-Hexylphenyl)-2-(4-nitrophenyl)-4H-dithieno[2,3-b:3',2'-e][1,4]thiazine (6a)

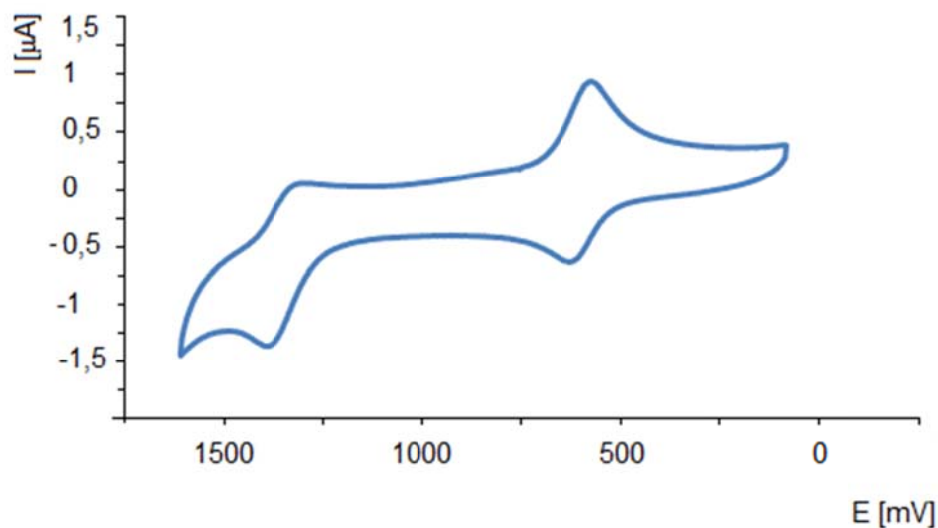

Cyclic voltammogram of **6a** recorded in dichloromethane,  $T = 293\text{ K}$ ,  $\nu = 100\text{ mV/s}$ ,  $0.1\text{ M}$  electrolyte [ $n\text{Bu}_4\text{N}^+$ ][ $\text{PF}_6^-$ ], Pt working electrode, Pt counter electrode, Ag/AgCl reference electrode.

### 6.2 4-(4-Hexylphenyl)-2-(thiophen-2-yl)-4H-dithieno[2,3-b:3',2'-e][1,4]thiazine (6b)

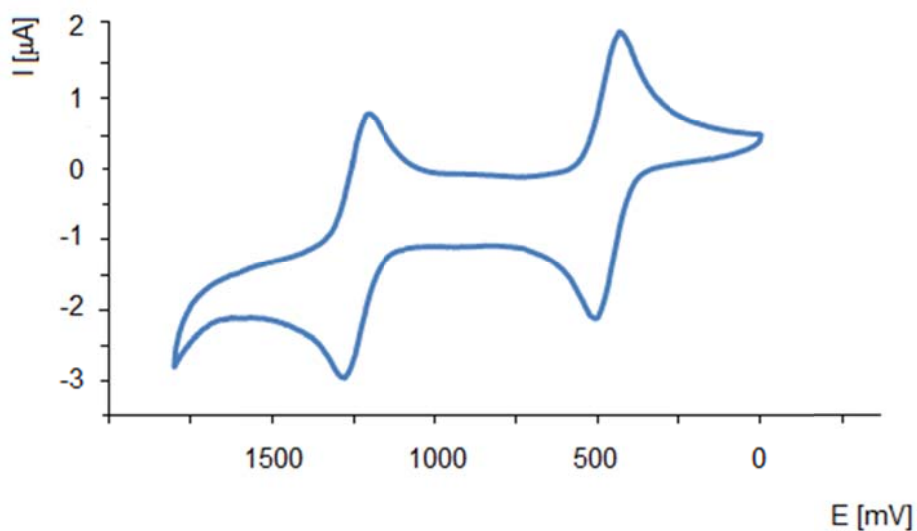

Cyclic voltammogram of **6b** recorded in dichloromethane,  $T = 293\text{ K}$ ,  $\nu = 100\text{ mV/s}$ ,  $0.1\text{ M}$  electrolyte [ $n\text{Bu}_4\text{N}^+$ ][ $\text{PF}_6^-$ ], Pt working electrode, Pt counter electrode, Ag/AgCl reference electrode.

### 6.3 4-(4-Hexylphenyl)-2-(pyridin-4-yl)-4H-dithieno[2,3-b:3',2'-e][1,4]thiazine (6c)

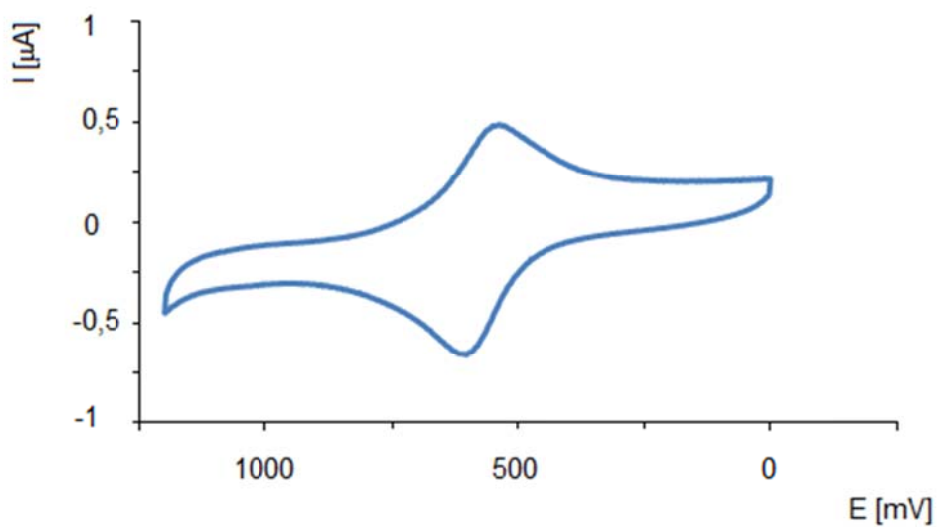

Cyclic voltammogram of **6c** recorded in dichloromethane,  $T = 293\text{ K}$ ,  $v = 100\text{ mV/s}$ ,  $0.1\text{ M}$  electrolyte [ $n\text{Bu}_4\text{N}^+$ ][ $\text{PF}_6^-$ ], Pt working electrode, Pt counter electrode, Ag/AgCl reference electrode.



## 7 Molecular modeling coordinates and FMO energies of compounds 3a, 3c and 3g-3j

### 7.1 XYZ-Coordinates of the S0 (Gaussian03, B3LYP/6-311G\*) of compound 3a

|   |           |           |           |
|---|-----------|-----------|-----------|
| C | 4.822897  | -1.168984 | -1.673543 |
| C | 4.656080  | -1.095909 | -0.277426 |
| C | 5.777375  | -1.345129 | 0.521772  |
| C | 7.018158  | -1.653525 | -0.032139 |
| C | 7.164603  | -1.710519 | -1.420248 |
| C | 6.051797  | -1.463356 | -2.235469 |
| C | 3.349208  | -0.762914 | 0.298639  |
| C | 2.361502  | 0.032009  | -0.222989 |
| C | 1.228156  | 0.175221  | 0.633552  |
| C | 1.355227  | -0.539110 | 1.797074  |
| S | 2.849895  | -1.429371 | 1.848712  |
| N | 0.023131  | 0.867129  | 0.327489  |
| C | -1.154168 | 0.130080  | 0.636090  |
| C | -1.251490 | -0.587787 | 1.800299  |
| S | 0.055290  | -0.664587 | 2.995135  |
| C | -2.283144 | -0.056623 | -0.217838 |
| C | -3.238795 | -0.887966 | 0.306701  |
| S | -2.711352 | -1.533697 | 1.856055  |
| C | -4.533259 | -1.271359 | -0.266169 |
| C | -5.643473 | -1.558495 | 0.535736  |
| C | -6.872657 | -1.915111 | -0.015098 |
| C | -7.018555 | -1.983804 | -1.402743 |
| C | -5.916757 | -1.699056 | -2.220636 |
| C | -4.698935 | -1.356663 | -1.661719 |
| C | -0.004171 | 2.269346  | 0.119947  |
| C | 1.184603  | 3.012727  | 0.022912  |
| C | 1.147019  | 4.380921  | -0.206953 |
| C | -0.055351 | 5.083407  | -0.346233 |
| C | -1.229611 | 4.341650  | -0.219204 |
| C | -1.214025 | 2.967548  | 0.013005  |
| C | -0.027473 | 6.577789  | -0.615084 |
| C | -1.379416 | 7.292188  | -0.611989 |
| O | 8.325804  | -1.995760 | -2.070521 |
| O | -8.169142 | -2.315112 | -2.050054 |
| C | 9.485743  | -2.268901 | -1.299447 |
| C | -9.316972 | -2.627903 | -1.275964 |
| H | 3.968645  | -1.013954 | -2.323768 |
| H | 5.693245  | -1.277812 | 1.601631  |
| H | 7.857168  | -1.834984 | 0.627664  |
| H | 6.176514  | -1.523441 | -3.310877 |
| H | 2.447368  | 0.533341  | -1.178237 |
| H | -2.390079 | 0.439993  | -1.173362 |
| H | -5.560511 | -1.483384 | 1.615166  |
| H | -7.703588 | -2.124517 | 0.646649  |
| H | -6.040487 | -1.768580 | -3.295589 |
| H | -3.851762 | -1.172683 | -2.313701 |
| H | 2.143591  | 2.529313  | 0.154025  |
| H | 2.089280  | 4.919933  | -0.270564 |
| H | -2.194571 | 4.831739  | -0.290814 |
| H | -2.156220 | 2.450071  | 0.135376  |
| H | 0.461405  | 6.752276  | -1.582386 |
| H | 0.626025  | 7.053701  | 0.126360  |

## 7 Molecular modeling coordinates and FMO energies of compounds 3a, 3c and 3g-3j

---

|   |            |           |           |
|---|------------|-----------|-----------|
| H | -1.245796  | 8.361730  | -0.793492 |
| H | -2.044278  | 6.910468  | -1.391923 |
| H | -1.893217  | 7.182857  | 0.347332  |
| H | 10.278021  | -2.471186 | -2.017640 |
| H | 9.769009   | -1.410002 | -0.681542 |
| H | 9.345070   | -3.146708 | -0.659661 |
| H | -10.101866 | -2.863879 | -1.991983 |
| H | -9.142358  | -3.496297 | -0.631720 |
| H | -9.631827  | -1.777067 | -0.662209 |

SCF Done: E (RB + HF-LYP) = -2558.33244230 A. U. after 7 cycles

Sum of electronic and zero-point Energies = -2557.859085

Sum of electronic and thermal Energies = -2557.826506

Sum of electronic and thermal Enthalpies = -2557.825561

Sum of electronic and thermal Free Energies = -2557.927268

LUMO+1 = -1.168 eV

LUMO = -1.211 eV

HOMO = -5.061 eV

HOMO-1 = -5.666 eV

### 7.2 XYZ-Coordinates of the S0 (Gaussian03, B3LYP/6-311G\*) of compound 3c

|   |           |           |           |
|---|-----------|-----------|-----------|
| C | 6.951569  | -2.265258 | 1.835631  |
| C | 6.808289  | -2.320503 | 0.450911  |
| C | 5.591964  | -1.999826 | -0.142923 |
| C | 4.487845  | -1.623936 | 0.638145  |
| C | 4.643045  | -1.582048 | 2.033549  |
| C | 5.863131  | -1.892923 | 2.623084  |
| C | 3.198543  | -1.275083 | 0.028710  |
| S | 2.652727  | -2.068211 | -1.442690 |
| C | 1.213769  | -1.092252 | -1.482317 |
| C | 1.137468  | -0.249613 | -0.402374 |
| C | 2.264834  | -0.370794 | 0.464305  |
| S | -0.099469 | -1.270564 | -2.658750 |
| C | -1.391212 | -0.981204 | -1.480652 |
| C | -1.242306 | -0.148043 | -0.401030 |
| N | -0.020614 | 0.543968  | -0.173023 |
| C | -2.375347 | -0.171966 | 0.466306  |
| C | -3.383444 | -0.992911 | 0.031627  |
| S | -2.908559 | -1.830477 | -1.439719 |
| C | 0.039600  | 1.960346  | -0.121916 |
| C | -1.131721 | 2.736568  | -0.107902 |
| C | -1.062600 | 4.120384  | -0.029416 |
| C | 0.155932  | 4.805960  | 0.032230  |
| C | 1.312648  | 4.028198  | -0.011266 |
| C | 1.265307  | 2.637597  | -0.091066 |
| C | 0.162525  | 6.321460  | 0.130394  |
| C | 1.534193  | 6.996689  | 0.108852  |
| C | -4.697252 | -1.229765 | 0.642380  |
| C | -5.829311 | -1.515316 | -0.136967 |
| C | -7.067842 | -1.731083 | 0.458316  |

|   |           |           |           |
|---|-----------|-----------|-----------|
| C | -7.205439 | -1.658416 | 1.842789  |
| C | -6.089417 | -1.374528 | 2.628528  |
| C | -4.847952 | -1.168919 | 2.037607  |
| H | 7.901395  | -2.513418 | 2.297678  |
| H | 7.649624  | -2.605308 | -0.172664 |
| H | 5.503429  | -2.018929 | -1.224286 |
| H | 3.793550  | -1.327866 | 2.658389  |
| H | 5.960498  | -1.856609 | 3.703458  |
| H | 2.387848  | 0.221482  | 1.361633  |
| H | -2.446856 | 0.429522  | 1.363139  |
| H | -2.102031 | 2.264203  | -0.184924 |
| H | -1.992128 | 4.684544  | -0.025416 |
| H | 2.288452  | 4.501152  | 0.007435  |
| H | 2.195488  | 2.088664  | -0.154271 |
| H | -0.361250 | 6.615535  | 1.049001  |
| H | -0.444654 | 6.727439  | -0.688197 |
| H | 1.425169  | 8.082212  | 0.174998  |
| H | 2.157851  | 6.679934  | 0.949632  |
| H | 2.080743  | 6.777701  | -0.812892 |
| H | -5.743250 | -1.545990 | -1.218276 |
| H | -7.930285 | -1.947188 | -0.164006 |
| H | -8.172434 | -1.824658 | 2.305959  |
| H | -6.182941 | -1.325497 | 3.708739  |
| H | -3.980024 | -0.983549 | 2.661354  |

SCF Done: E (RB + HF-LYP) = -2329.229220214 A. U. after 9 cycles

Sum of electronic and zero-point Energies = -2328.821074

Sum of electronic and thermal Energies = -2328.793723

Sum of electronic and thermal Enthalpies = -2328.792779

Sum of electronic and thermal Free Energies = -2328.882714

LUMO+1 = -1.386 eV

LUMO = -1.451 eV

HOMO = -5.206 eV

HOMO-1 = -5.921 eV

### 7.3 XYZ-Coordinates of the S<sub>0</sub> (Gaussian03, B3LYP/6-311G\*) of compound 3g

|   |          |          |          |
|---|----------|----------|----------|
| C | -0.06981 | 5.00414  | -0.33937 |
| C | 1.13533  | 4.30531  | -0.20654 |
| C | 1.17767  | 2.93579  | 0.01571  |
| C | -0.00838 | 2.18995  | 0.11139  |
| C | -1.22062 | 2.88261  | 0.00969  |
| C | -1.24148 | 4.2581   | -0.21484 |
| N | 0.02387  | 0.78269  | 0.31313  |
| C | -1.14908 | 0.04431  | 0.62761  |
| C | -1.24511 | -0.66973 | 1.79657  |
| S | 0.0612   | -0.74394 | 2.99042  |
| C | 1.35969  | -0.61258 | 1.79308  |
| C | 1.22923  | 0.09716  | 0.6248   |
| S | -2.70592 | -1.60777 | 1.8689   |

## 7 Molecular modeling coordinates and FMO energies of compounds 3a, 3c and 3g-3j

---

|   |          |          |          |
|---|----------|----------|----------|
| C | -3.23313 | -0.97546 | 0.31541  |
| C | -2.27808 | -0.14836 | -0.22035 |
| S | 2.86056  | -1.48547 | 1.86094  |
| C | 3.35566  | -0.82931 | 0.30663  |
| C | 2.36356  | -0.0449  | -0.22605 |
| C | -0.04782 | 6.50027  | -0.59785 |
| C | 1.40253  | 7.20906  | -0.59322 |
| H | -2.38539 | 0.34227  | -1.17878 |
| H | 2.44667  | 0.45075  | -1.18436 |
| H | 2.13926  | 2.45646  | 0.14327  |
| H | -2.16165 | 2.36276  | 0.13164  |
| H | 2.07537  | 4.84787  | -0.26872 |
| H | -2.20777 | 4.74571  | -0.28193 |
| H | 0.4432   | 6.68192  | -1.56251 |
| H | 0.60243  | 6.97273  | 0.14839  |
| H | -1.27196 | 8.27983  | -0.76809 |
| H | -2.06437 | 6.8303   | -1.37711 |
| H | -1.91785 | 7.09319  | 0.36448  |
| C | -4.52938 | -1.35375 | -0.25166 |
| C | 4.66585  | -1.14946 | -0.26406 |
| C | 5.77247  | -1.44349 | 0.55054  |
| C | 4.84597  | -1.16565 | -1.65871 |
| C | 6.08111  | -1.45116 | -2.21708 |
| C | 7.00929  | -1.73989 | -0.00076 |
| C | 7.17807  | -1.74332 | -1.39253 |
| H | 4.0019   | -0.97566 | -2.31178 |
| H | 5.66983  | -1.4185  | 1.62992  |
| H | 7.85313  | -1.96007 | 0.6427   |
| H | 6.20227  | -1.46241 | -3.2941  |
| C | 8.45219  | -2.04376 | -1.96556 |
| N | 9.48237  | -2.28572 | -2.42956 |
| C | -5.62059 | -1.69284 | 0.56618  |
| C | -4.71128 | -1.38205 | -1.64587 |
| C | -6.84462 | -2.04383 | 0.01837  |
| C | -5.93412 | -1.72215 | -2.20079 |
| C | -7.01584 | -2.05863 | -1.37304 |
| H | -3.87738 | -1.15786 | -2.30118 |
| H | -5.5169  | -1.66031 | 1.64525  |
| H | -7.67692 | -2.29825 | 0.66424  |
| H | -6.05684 | -1.74193 | -3.27751 |
| C | -8.27702 | -2.41532 | -1.94245 |
| N | -9.29679 | -2.70275 | -2.4035  |

SCF Done: E (RB + HF-LYP) = -2513.76143743 A. U. after 8 cycles

Sum of electronic and zero-point Energies = -2513.355987

Sum of electronic and thermal Energies = -2513.325005

Sum of electronic and thermal Enthalpies = -2513.324061

Sum of electronic and thermal Free Energies = -2513.422675

LUMO+1 = -2.331 eV

LUMO = -2.395 eV

HOMO = -5.655 eV

HOMO-1 = -6.409 eV

**7.4 XYZ-Coordinates of the S0 (Gaussian03, B3LYP/6-311G\*) of compound 3h**

|   |           |           |           |
|---|-----------|-----------|-----------|
| C | -7.007540 | -1.915800 | -1.116910 |
| C | -6.854773 | -1.859549 | 0.264191  |
| C | -5.626369 | -1.488267 | 0.789950  |
| C | -4.540908 | -1.177952 | -0.048623 |
| C | -4.729843 | -1.255494 | -1.441191 |
| C | -5.955846 | -1.615900 | -1.977625 |
| C | -3.242266 | -0.779367 | 0.496710  |
| S | -2.718331 | -1.331124 | 2.081667  |
| C | -1.252521 | -0.407175 | 1.958855  |
| C | -1.152485 | 0.243819  | 0.753516  |
| C | -2.282365 | 0.012734  | -0.082564 |
| S | 0.052367  | -0.424596 | 3.156075  |
| C | 1.352251  | -0.360617 | 1.955089  |
| C | 1.225730  | 0.286331  | 0.749828  |
| N | 0.023588  | 0.958804  | 0.401100  |
| C | 2.359839  | 0.092911  | -0.090193 |
| C | 3.348718  | -0.664952 | 0.486357  |
| S | 2.849371  | -1.233272 | 2.073294  |
| C | -0.004209 | 2.351569  | 0.113504  |
| C | 1.183539  | 3.083997  | -0.043997 |
| C | 1.143761  | 4.437881  | -0.347749 |
| C | -0.060057 | 5.133713  | -0.505612 |
| C | -1.233007 | 4.402563  | -0.319909 |
| C | -1.214698 | 3.043102  | -0.013066 |
| C | -0.035552 | 6.611471  | -0.853727 |
| C | -1.386580 | 7.327283  | -0.865038 |
| C | 4.658514  | -1.019047 | -0.062924 |
| C | 5.756395  | -1.292030 | 0.772502  |
| C | 6.995026  | -1.622036 | 0.243259  |
| C | 7.145473  | -1.673988 | -1.138262 |
| C | 6.081715  | -1.410040 | -1.995926 |
| C | 4.845887  | -1.090776 | -1.455999 |
| N | 8.461053  | -2.019720 | -1.707461 |
| O | 9.373677  | -2.252088 | -0.925219 |
| O | 8.559815  | -2.052355 | -2.927419 |
| N | -8.312539 | -2.305092 | -1.682351 |
| O | -9.214436 | -2.568566 | -0.897531 |
| O | -8.413963 | -2.340082 | -2.902023 |
| H | -7.694503 | -2.094288 | 0.904272  |
| H | -5.515766 | -1.417126 | 1.866254  |
| H | -3.900463 | -1.054478 | -2.109178 |
| H | -6.107127 | -1.680515 | -3.046743 |
| H | -2.386796 | 0.452658  | -1.065531 |
| H | 2.444941  | 0.533512  | -1.074713 |
| H | 2.145269  | 2.609238  | 0.098531  |
| H | 2.085133  | 4.970719  | -0.455963 |
| H | -2.198120 | 4.890143  | -0.402156 |
| H | -2.156257 | 2.536850  | 0.153845  |
| H | 0.437411  | 6.732200  | -1.836750 |
| H | 0.631566  | 7.123326  | -0.149613 |
| H | -1.254113 | 8.385809  | -1.101814 |
| H | -2.064151 | 6.909242  | -1.614753 |
| H | -1.884901 | 7.267716  | 0.106672  |
| H | 5.646662  | -1.224024 | 1.849101  |
| H | 7.844073  | -1.828008 | 0.880943  |
| H | 6.231891  | -1.470214 | -3.065459 |
| H | 4.008291  | -0.918384 | -2.121698 |

|                                             |                                       |
|---------------------------------------------|---------------------------------------|
| SCF Done: E (RB + HF-LYP)                   | = -2738.34454905 A. U. after 7 cycles |
| Sum of electronic and zero-point Energies   | = -2737.931407                        |
| Sum of electronic and thermal Energies      | = -2737.898876                        |
| Sum of electronic and thermal Enthalpies    | = -2737.897932                        |
| Sum of electronic and thermal Free Energies | = -2738.001513                        |
| LUMO+1                                      | = -2.897 eV                           |
| LUMO                                        | = -2.932 eV                           |
| HOMO                                        | = -5.718 eV                           |
| HOMO-1                                      | = -6.507 eV                           |

### 7.5 XYZ-Coordinates of the S0 (Gaussian03, B3LYP/6-311G\*) of compound 3i

|   |           |           |           |
|---|-----------|-----------|-----------|
| C | -4.834464 | -1.307954 | 0.976685  |
| C | -4.659679 | -1.041352 | -0.388517 |
| C | -5.767467 | -1.188044 | -1.240915 |
| C | -7.006710 | -1.587448 | -0.750390 |
| C | -7.182389 | -1.842095 | 0.605534  |
| C | -6.083044 | -1.690719 | 1.443321  |
| C | -3.348374 | -0.618435 | -0.892134 |
| C | -2.359495 | 0.060347  | -0.227498 |
| C | -1.225185 | 0.355479  | -1.040338 |
| C | -1.355188 | -0.133743 | -2.316402 |
| S | -2.853418 | -0.986690 | -2.537543 |
| N | -0.017895 | 0.970703  | -0.613105 |
| C | 1.153642  | 0.297032  | -1.051280 |
| C | 1.248065  | -0.198241 | -2.328041 |
| S | -0.055983 | -0.047202 | -3.517539 |
| C | 2.279993  | -0.051376 | -0.248703 |
| C | 3.228587  | -0.777722 | -0.921596 |
| S | 2.701095  | -1.123056 | -2.562058 |
| C | 4.522638  | -1.262328 | -0.429045 |
| C | 5.615974  | -1.458882 | -1.290003 |
| C | 6.839428  | -1.914634 | -0.808985 |
| C | 7.013603  | -2.177946 | 0.545477  |
| C | 5.928582  | -1.977685 | 1.391644  |
| C | 4.695223  | -1.538222 | 0.934587  |
| C | 0.018662  | 2.304404  | -0.124204 |
| C | -1.164738 | 3.015357  | 0.134047  |
| C | -1.117142 | 4.307617  | 0.638215  |
| C | 0.090622  | 4.962253  | 0.904512  |
| C | 1.259408  | 4.258810  | 0.614753  |
| C | 1.233317  | 2.961192  | 0.107277  |
| C | 0.075345  | 6.369160  | 1.475359  |
| C | 1.430382  | 7.068593  | 1.589370  |
| N | -6.243978 | -1.963838 | 2.891735  |
| O | -7.349370 | -2.314114 | 3.279720  |
| O | -5.263482 | -1.819686 | 3.608493  |
| N | 6.087993  | -2.258799 | 2.838675  |
| O | 7.179921  | -2.657061 | 3.218430  |
| O | 5.119969  | -2.072664 | 3.562668  |

|   |           |           |           |
|---|-----------|-----------|-----------|
| H | -4.012497 | -1.240040 | 1.675823  |
| H | -5.662344 | -0.968519 | -2.297982 |
| H | -7.845382 | -1.691267 | -1.429757 |
| H | -8.134298 | -2.149516 | 1.015771  |
| H | -2.441100 | 0.369980  | 0.806189  |
| H | 2.386621  | 0.256078  | 0.783371  |
| H | 5.513042  | -1.233811 | -2.346121 |
| H | 7.667423  | -2.055860 | -1.494677 |
| H | 7.953732  | -2.528356 | 0.948368  |
| H | 3.882277  | -1.433634 | 1.639719  |
| H | -2.128919 | 2.574513  | -0.081629 |
| H | -2.055352 | 4.825039  | 0.822366  |
| H | 2.227353  | 4.721330  | 0.773296  |
| H | 2.172128  | 2.478015  | -0.128921 |
| H | -0.392008 | 6.339599  | 2.467969  |
| H | -0.592339 | 6.986373  | 0.862015  |
| H | 1.304709  | 8.078705  | 1.987040  |
| H | 2.109285  | 6.537190  | 2.262107  |
| H | 1.923828  | 7.156607  | 0.617282  |

SCF Done: E (RB + HF-LYP) = - 2738.34248589 A. U. after 7 cycles

Sum of electronic and zero-point Energies = -2737.931407

Sum of electronic and thermal Energies = -2737.898876

Sum of electronic and thermal Enthalpies = -2737.897932

Sum of electronic and thermal Free Energies = -2738.001513

LUMO+1 = -2.765 eV

LUMO = -2.768 eV

HOMO = -5.562 eV

HOMO-1 = -6.361 eV

## 7.6 XYZ-Coordinates of the S0 (Gaussian03, B3LYP/6-311G\*) of compound 3j

|   |           |           |           |
|---|-----------|-----------|-----------|
| C | 5.080365  | -1.622025 | -1.085644 |
| C | 4.727512  | -0.899951 | 0.071164  |
| C | 5.792435  | -0.548504 | 0.922525  |
| C | 7.111726  | -0.870582 | 0.632286  |
| C | 7.420869  | -1.587075 | -0.521551 |
| C | 6.396116  | -1.975950 | -1.371885 |
| C | 3.355259  | -0.571808 | 0.506124  |
| C | 2.352662  | 0.137269  | -0.100090 |
| C | 1.222391  | 0.355667  | 0.742660  |
| C | 1.363763  | -0.226128 | 1.977892  |
| S | 2.878131  | -1.060867 | 2.131516  |
| N | 0.004238  | 0.984628  | 0.367721  |
| C | -1.157637 | 0.262284  | 0.751824  |
| C | -1.244583 | -0.328726 | 1.987321  |
| S | 0.063416  | -0.263679 | 3.180329  |
| C | -2.275365 | -0.039025 | -0.081953 |

## 7 Molecular modeling coordinates and FMO energies of compounds 3a, 3c and 3g-3j

---

|   |           |           |           |
|---|-----------|-----------|-----------|
| C | -3.215868 | -0.822858 | 0.531023  |
| S | -2.690305 | -1.276055 | 2.152051  |
| C | -4.562581 | -1.252888 | 0.105272  |
| C | -5.645909 | -0.977551 | 0.961301  |
| C | -6.939712 | -1.395213 | 0.678291  |
| C | -7.201459 | -2.135228 | -0.472397 |
| C | -6.155209 | -2.451215 | -1.326847 |
| C | -4.867357 | -2.001772 | -1.047989 |
| C | -0.054759 | 2.351693  | -0.006757 |
| C | 1.115331  | 3.097662  | -0.225405 |
| C | 1.043567  | 4.429342  | -0.609706 |
| C | -0.176002 | 5.090547  | -0.792507 |
| C | -1.331195 | 4.348426  | -0.547540 |
| C | -1.280780 | 3.011311  | -0.159229 |
| C | -0.187242 | 6.542221  | -1.237577 |
| C | -1.543593 | 7.248073  | -1.209733 |
| N | -3.838537 | -2.390389 | -2.033028 |
| O | -3.888818 | -3.533514 | -2.465492 |
| O | -3.026857 | -1.543529 | -2.377925 |
| N | 4.078037  | -2.082567 | -2.066766 |
| O | 4.210139  | -3.217421 | -2.503635 |
| O | 3.204337  | -1.296784 | -2.404750 |
| H | 5.564917  | 0.008119  | 1.824024  |
| H | 7.898958  | -0.559799 | 1.310744  |
| H | 8.447134  | -1.846175 | -0.755813 |
| H | 6.594536  | -2.559941 | -2.261397 |
| H | 2.418504  | 0.501349  | -1.112995 |
| H | -2.378352 | 0.322903  | -1.092639 |
| H | -5.455000 | -0.403527 | 1.860375  |
| H | -7.744242 | -1.140726 | 1.359897  |
| H | -8.207311 | -2.468680 | -0.701090 |
| H | -6.314986 | -3.050444 | -2.214005 |
| H | 2.088214  | 2.649157  | -0.074390 |
| H | 1.972401  | 4.972424  | -0.766222 |
| H | -2.307447 | 4.810136  | -0.647955 |
| H | -2.209196 | 2.494597  | 0.044922  |
| H | 0.220859  | 6.601570  | -2.254918 |
| H | 0.517574  | 7.103479  | -0.612245 |
| H | -1.435755 | 8.293047  | -1.511362 |
| H | -2.259332 | 6.785291  | -1.894814 |
| H | -1.984382 | 7.237136  | -0.208766 |

SCF Done: E (RB + HF-LYP) = -2738.31965016 A. U. after 6 cycles

Sum of electronic and zero-point Energies = -2737.931407

Sum of electronic and thermal Energies = -2737.898876

Sum of electronic and thermal Enthalpies = -2737.897932

Sum of electronic and thermal Free Energies = -2738.001513

LUMO+1 = -2.436 eV

LUMO = -2.467 eV

HOMO = -5.330 eV



HOMO-1 = -6.184 eV

### 7.7 Results of the TD-DFT calculation of compound 3g

Excitation energies and oscillator strengths:

Excited State 1: Singlet-A, 2.7252 eV, 454.96 nm, f = 0.0885

134 -> 135 0.69200

Excited State 2: Singlet-A, 2.8625 eV, 433.13 nm, f = 0.0234

134 -> 136 0.68751

Excited State 3: Singlet-A, 3.5572 eV, 348.54 nm, f = 0.5258

133 -> 135 0.68432

Excited State 4: Singlet-A, 3.6793 eV, 336.98 nm, f = 0.0393

132 -> 135 0.21770

133 -> 136 0.65319

Excited State 5: Singlet-A, 3.8533 eV, 321.76 nm, f = 0.1599

132 -> 135 0.19498

133 -> 136 -0.12300

134 -> 137 0.49287

134 -> 139 0.40656

Excited State 6: Singlet-A, 3.9341 eV, 315.15 nm, f = 0.5655

132 -> 136 0.65226

134 -> 138 0.16073

Excited State 7: Singlet-A, 3.9544 eV, 313.54 nm, f = 0.0328

132 -> 135 -0.33242

134 -> 137 0.47137

134 -> 139 -0.36578

Excited State 8: Singlet-A, 3.9659 eV, 312.63 nm, f = 0.1013

132 -> 136 -0.14166

134 -> 138 0.67307

Excited State 9: Singlet-A, 4.0385 eV, 307.00 nm, f = 0.0005

## 7 Molecular modeling coordinates and FMO energies of compounds 3a, 3c and 3g-3j

---

|            |          |
|------------|----------|
| 132 -> 136 | 0.10588  |
| 134 -> 140 | 0.66216  |
| 134 -> 142 | -0.12672 |

Excited State 10: Singlet-A, 4.0559 eV, 305.69 nm, f = 0.1473

|            |          |
|------------|----------|
| 132 -> 135 | 0.49509  |
| 133 -> 136 | -0.12412 |
| 134 -> 139 | -0.40535 |

Excited State 11: Singlet-A, 4.3394 eV, 285.72 nm, f = 0.0049

|            |         |
|------------|---------|
| 131 -> 135 | 0.70247 |
|------------|---------|

Excited State 12: Singlet-A, 4.3890 eV, 282.49 nm, f = 0.0025

|            |         |
|------------|---------|
| 131 -> 136 | 0.63579 |
| 134 -> 141 | 0.27919 |

Excited State 13: Singlet-A, 4.4560 eV, 278.24 nm, f = 0.0328

|            |          |
|------------|----------|
| 131 -> 136 | -0.30048 |
| 131 -> 144 | 0.10466  |
| 134 -> 141 | 0.59139  |

Excited State 14: Singlet-A, 4.5176 eV, 274.45 nm, f = 0.0053

|            |          |
|------------|----------|
| 133 -> 140 | -0.10626 |
| 134 -> 140 | 0.13904  |
| 134 -> 141 | 0.12047  |
| 134 -> 142 | 0.61853  |
| 134 -> 143 | -0.15920 |

Excited State 15: Singlet-A, 4.5242 eV, 274.04 nm, f = 0.0060

|            |          |
|------------|----------|
| 126 -> 135 | -0.18300 |
| 127 -> 136 | -0.18068 |
| 132 -> 138 | 0.26591  |
| 133 -> 137 | 0.54709  |

Excited State 16: Singlet-A, 4.5430 eV, 272.91 nm, f = 0.0093

|            |         |
|------------|---------|
| 126 -> 135 | 0.11698 |
| 126 -> 136 | 0.20247 |
| 127 -> 135 | 0.21497 |
| 130 -> 135 | 0.11046 |
| 132 -> 137 | 0.31923 |

133 -> 138            0.49142

Excited State 17: Singlet-A, 4.6076 eV, 269.08 nm, f = 0.0518

134 -> 142            0.16379

134 -> 143            0.60699

134 -> 144            -0.11223

Excited State 18: Singlet-A, 4.6754 eV, 265.18 nm, f = 0.0298

126 -> 135            0.10485

130 -> 136            -0.12669

132 -> 138            -0.16298

133 -> 137            0.15735

133 -> 139            0.59109

Excited State 19: Singlet-A, 4.6837 eV, 264.71 nm, f = 0.0610

129 -> 136            0.11208

130 -> 135            0.64033

132 -> 139            0.14748

133 -> 138            -0.11648

Excited State 20: Singlet-A, 4.7590 eV, 260.53 nm, f = 0.0362

128 -> 136            -0.12313

129 -> 135            0.21114

130 -> 136            0.59391

132 -> 140            -0.10574

133 -> 137            0.15184

Excited State 21: Singlet-A, 4.8281 eV, 256.80 nm, f = 0.0207

129 -> 135            0.62087

130 -> 136            -0.28416

Excited State 22: Singlet-A, 4.8509 eV, 255.59 nm, f = 0.0084

128 -> 135            0.13632

129 -> 136            0.45933

130 -> 135            -0.20209

132 -> 137            0.17788

132 -> 139            0.17902

133 -> 138            -0.11981

133 -> 140            0.34208

Excited State 23: Singlet-A, 4.8795 eV, 254.09 nm, f = 0.0120

|            |          |
|------------|----------|
| 129 -> 136 | -0.17606 |
| 132 -> 137 | -0.29909 |
| 133 -> 138 | 0.32093  |
| 133 -> 140 | 0.44276  |
| 134 -> 146 | -0.10891 |

Excited State 24: Singlet-A, 4.8876 eV, 253.67 nm, f = 0.0071

|            |          |
|------------|----------|
| 128 -> 135 | -0.34264 |
| 129 -> 136 | 0.39898  |
| 132 -> 137 | -0.27723 |
| 133 -> 138 | 0.19669  |
| 133 -> 140 | -0.16019 |

Excited State 25: Singlet-A, 4.9080 eV, 252.62 nm, f = 0.0292

|            |          |
|------------|----------|
| 126 -> 135 | -0.19454 |
| 127 -> 136 | -0.17326 |
| 128 -> 137 | -0.11363 |
| 132 -> 138 | 0.39301  |
| 133 -> 137 | -0.34583 |
| 133 -> 139 | 0.29032  |
